# Supplementary material for: Indole-3-Acetamido-Polyamines as Antimicrobial Agents and Antibiotic Adjuvants
Source: MDPI journal article supplement (doi:10.3390/biom13081226), 2023-08-07
Supplement: s1 [file s1]

## Supporting Information

# Indole Acetamido-Polyamines as Antimicrobial Agents and Antibiotic Adjuvants

Kenneth Sue<sup>1</sup>, Melissa M. Cadelis<sup>1,2</sup>, Evangelene S. Gill<sup>1</sup>, Florent Rouvier<sup>3</sup>, Marie-Lise Bourguet-Kondracki<sup>4</sup>, Jean Michel Brunel<sup>3</sup> and Brent R. Copp<sup>1,\*</sup>

<sup>1</sup> School of Chemical Sciences, The University of Auckland, Private Bag 92019, Auckland 1142, New Zealand

<sup>2</sup> School of Medical Sciences, The University of Auckland, Private Bag 92019, Auckland 1142, New Zealand

<sup>3</sup> Membranes et Cibles Thérapeutiques, INSERM, Aix-Marseille Université, 27 bd Jean Moulin, 13385 Marseille, France

<sup>4</sup> Laboratoire Molécules de Communication et Adaptation des Micro-organismes, UMR 7245 CNRS, Muséum National d'Histoire Naturelle, 57 rue Cuvier (C.P. 54), 75005 Paris, France

\*Corresponding author e-mail address: b.copp@auckland.ac.nz (Brent R. Copp).

### Contents

|                                                                                                                                             |            |
|---------------------------------------------------------------------------------------------------------------------------------------------|------------|
| <b>Figure S1</b> <sup>1</sup> H (CD <sub>3</sub> OD, 400 MHz) and <sup>13</sup> C (CD <sub>3</sub> OD, 100 MHz) NMR spectra for <b>14b</b>  | <b>S3</b>  |
| <b>Figure S2</b> <sup>1</sup> H (CD <sub>3</sub> OD, 400 MHz) and <sup>13</sup> C (CD <sub>3</sub> OD, 100 MHz) NMR spectra for <b>14c</b>  | <b>S4</b>  |
| <b>Figure S3</b> <sup>1</sup> H (CD <sub>3</sub> OD, 400 MHz) and <sup>13</sup> C (CD <sub>3</sub> OD, 100 MHz) NMR spectra for <b>14d</b>  | <b>S5</b>  |
| <b>Figure S4</b> <sup>1</sup> H (CD <sub>3</sub> OD, 400 MHz) and <sup>13</sup> C (CD <sub>3</sub> OD, 100 MHz) NMR spectra for <b>14e</b>  | <b>S6</b>  |
| <b>Figure S5</b> <sup>1</sup> H (CD <sub>3</sub> OD, 400 MHz) and <sup>13</sup> C (CD <sub>3</sub> OD, 100 MHz) NMR spectra for <b>14f</b>  | <b>S7</b>  |
| <b>Figure S6</b> <sup>1</sup> H (CD <sub>3</sub> OD, 400 MHz) and <sup>13</sup> C (CD <sub>3</sub> OD, 100 MHz) NMR spectra for <b>15b</b>  | <b>S8</b>  |
| <b>Figure S7</b> <sup>1</sup> H (CD <sub>3</sub> OD, 400 MHz) and <sup>13</sup> C (CD <sub>3</sub> OD, 100 MHz) NMR spectra for <b>15c</b>  | <b>S9</b>  |
| <b>Figure S8</b> <sup>1</sup> H (CD <sub>3</sub> OD, 400 MHz) and <sup>13</sup> C (CD <sub>3</sub> OD, 100 MHz) NMR spectra for <b>15d</b>  | <b>S10</b> |
| <b>Figure S9</b> <sup>1</sup> H (CD <sub>3</sub> OD, 400 MHz) and <sup>13</sup> C (CD <sub>3</sub> OD, 100 MHz) NMR spectra for <b>15e</b>  | <b>S11</b> |
| <b>Figure S10</b> <sup>1</sup> H (CD <sub>3</sub> OD, 400 MHz) and <sup>13</sup> C (CD <sub>3</sub> OD, 100 MHz) NMR spectra for <b>15f</b> | <b>S12</b> |
| <b>Figure S11</b> <sup>1</sup> H (CD <sub>3</sub> OD, 400 MHz) and <sup>13</sup> C (CD <sub>3</sub> OD, 100 MHz) NMR spectra for <b>16b</b> | <b>S13</b> |
| <b>Figure S12</b> <sup>1</sup> H (CD <sub>3</sub> OD, 400 MHz) and <sup>13</sup> C (CD <sub>3</sub> OD, 100 MHz) NMR spectra for <b>16c</b> | <b>S14</b> |
| <b>Figure S13</b> <sup>1</sup> H (CD <sub>3</sub> OD, 400 MHz) and <sup>13</sup> C (CD <sub>3</sub> OD, 100 MHz) NMR spectra for <b>16d</b> | <b>S15</b> |
| <b>Figure S14</b> <sup>1</sup> H (CD <sub>3</sub> OD, 400 MHz) and <sup>13</sup> C (CD <sub>3</sub> OD, 100 MHz) NMR spectra for <b>16e</b> | <b>S16</b> |
| <b>Figure S15</b> <sup>1</sup> H (CD <sub>3</sub> OD, 400 MHz) and <sup>13</sup> C (CD <sub>3</sub> OD, 100 MHz) NMR spectra for <b>16f</b> | <b>S17</b> |
| <b>Figure S16</b> <sup>1</sup> H (CD <sub>3</sub> OD, 400 MHz) and <sup>13</sup> C (CD <sub>3</sub> OD, 100 MHz) NMR spectra for <b>17a</b> | <b>S18</b> |
| <b>Figure S17</b> <sup>1</sup> H (CD <sub>3</sub> OD, 400 MHz) and <sup>13</sup> C (CD <sub>3</sub> OD, 100 MHz) NMR spectra for <b>17b</b> | <b>S19</b> |
| <b>Figure S18</b> <sup>1</sup> H (CD <sub>3</sub> OD, 400 MHz) and <sup>13</sup> C (CD <sub>3</sub> OD, 100 MHz) NMR spectra for <b>17c</b> | <b>S20</b> |

|                                                                                                                                                       |            |
|-------------------------------------------------------------------------------------------------------------------------------------------------------|------------|
| <b>Figure S19</b> $^1\text{H}$ ( $\text{CD}_3\text{OD}$ , 400 MHz) and $^{13}\text{C}$ ( $\text{CD}_3\text{OD}$ , 100 MHz) NMR spectra for <b>17d</b> | <b>S21</b> |
| <b>Figure S20</b> $^1\text{H}$ ( $\text{CD}_3\text{OD}$ , 400 MHz) and $^{13}\text{C}$ ( $\text{CD}_3\text{OD}$ , 100 MHz) NMR spectra for <b>17e</b> | <b>S22</b> |
| <b>Figure S21</b> $^1\text{H}$ ( $\text{CD}_3\text{OD}$ , 400 MHz) and $^{13}\text{C}$ ( $\text{CD}_3\text{OD}$ , 100 MHz) NMR spectra for <b>17f</b> | <b>S23</b> |
| <b>Figure S22</b> $^1\text{H}$ ( $\text{CD}_3\text{OD}$ , 400 MHz) and $^{13}\text{C}$ ( $\text{CD}_3\text{OD}$ , 100 MHz) NMR spectra for <b>18a</b> | <b>S24</b> |
| <b>Figure S23</b> $^1\text{H}$ ( $\text{CD}_3\text{OD}$ , 400 MHz) and $^{13}\text{C}$ ( $\text{CD}_3\text{OD}$ , 100 MHz) NMR spectra for <b>18b</b> | <b>S25</b> |
| <b>Figure S24</b> $^1\text{H}$ ( $\text{CD}_3\text{OD}$ , 400 MHz) and $^{13}\text{C}$ ( $\text{CD}_3\text{OD}$ , 100 MHz) NMR spectra for <b>18c</b> | <b>S26</b> |
| <b>Figure S25</b> $^1\text{H}$ ( $\text{CD}_3\text{OD}$ , 400 MHz) and $^{13}\text{C}$ ( $\text{CD}_3\text{OD}$ , 100 MHz) NMR spectra for <b>18d</b> | <b>S27</b> |
| <b>Figure S26</b> $^1\text{H}$ ( $\text{CD}_3\text{OD}$ , 400 MHz) and $^{13}\text{C}$ ( $\text{CD}_3\text{OD}$ , 100 MHz) NMR spectra for <b>18e</b> | <b>S28</b> |
| <b>Figure S27</b> $^1\text{H}$ ( $\text{CD}_3\text{OD}$ , 400 MHz) and $^{13}\text{C}$ ( $\text{CD}_3\text{OD}$ , 100 MHz) NMR spectra for <b>18f</b> | <b>S29</b> |
| <b>Figure S28</b> $^1\text{H}$ ( $\text{CD}_3\text{OD}$ , 400 MHz) and $^{13}\text{C}$ ( $\text{CD}_3\text{OD}$ , 100 MHz) NMR spectra for <b>19a</b> | <b>S30</b> |
| <b>Figure S29</b> $^1\text{H}$ ( $\text{CD}_3\text{OD}$ , 400 MHz) and $^{13}\text{C}$ ( $\text{CD}_3\text{OD}$ , 100 MHz) NMR spectra for <b>19b</b> | <b>S31</b> |
| <b>Figure S30</b> $^1\text{H}$ ( $\text{CD}_3\text{OD}$ , 400 MHz) and $^{13}\text{C}$ ( $\text{CD}_3\text{OD}$ , 100 MHz) NMR spectra for <b>19c</b> | <b>S32</b> |
| <b>Figure S31</b> $^1\text{H}$ ( $\text{CD}_3\text{OD}$ , 400 MHz) and $^{13}\text{C}$ ( $\text{CD}_3\text{OD}$ , 100 MHz) NMR spectra for <b>19d</b> | <b>S33</b> |
| <b>Figure S32</b> $^1\text{H}$ ( $\text{CD}_3\text{OD}$ , 400 MHz) and $^{13}\text{C}$ ( $\text{CD}_3\text{OD}$ , 100 MHz) NMR spectra for <b>19e</b> | <b>S34</b> |
| <b>Figure S33</b> $^1\text{H}$ ( $\text{CD}_3\text{OD}$ , 400 MHz) and $^{13}\text{C}$ ( $\text{CD}_3\text{OD}$ , 100 MHz) NMR spectra for <b>19f</b> | <b>S35</b> |
| <b>Figure S34</b> $^1\text{H}$ ( $\text{CD}_3\text{OD}$ , 400 MHz) and $^{13}\text{C}$ ( $\text{CD}_3\text{OD}$ , 100 MHz) NMR spectra for <b>20a</b> | <b>S36</b> |
| <b>Figure S35</b> $^1\text{H}$ ( $\text{CD}_3\text{OD}$ , 400 MHz) and $^{13}\text{C}$ ( $\text{CD}_3\text{OD}$ , 100 MHz) NMR spectra for <b>20b</b> | <b>S37</b> |
| <b>Figure S36</b> $^1\text{H}$ ( $\text{CD}_3\text{OD}$ , 400 MHz) and $^{13}\text{C}$ ( $\text{CD}_3\text{OD}$ , 100 MHz) NMR spectra for <b>20c</b> | <b>S38</b> |
| <b>Figure S37</b> $^1\text{H}$ ( $\text{CD}_3\text{OD}$ , 400 MHz) and $^{13}\text{C}$ ( $\text{CD}_3\text{OD}$ , 100 MHz) NMR spectra for <b>20d</b> | <b>S39</b> |
| <b>Figure S38</b> $^1\text{H}$ ( $\text{CD}_3\text{OD}$ , 400 MHz) and $^{13}\text{C}$ ( $\text{CD}_3\text{OD}$ , 100 MHz) NMR spectra for <b>20e</b> | <b>S40</b> |
| <b>Figure S39</b> $^1\text{H}$ ( $\text{CD}_3\text{OD}$ , 400 MHz) and $^{13}\text{C}$ ( $\text{CD}_3\text{OD}$ , 100 MHz) NMR spectra for <b>20f</b> | <b>S41</b> |

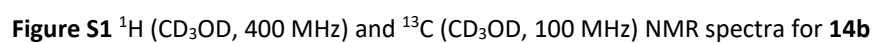

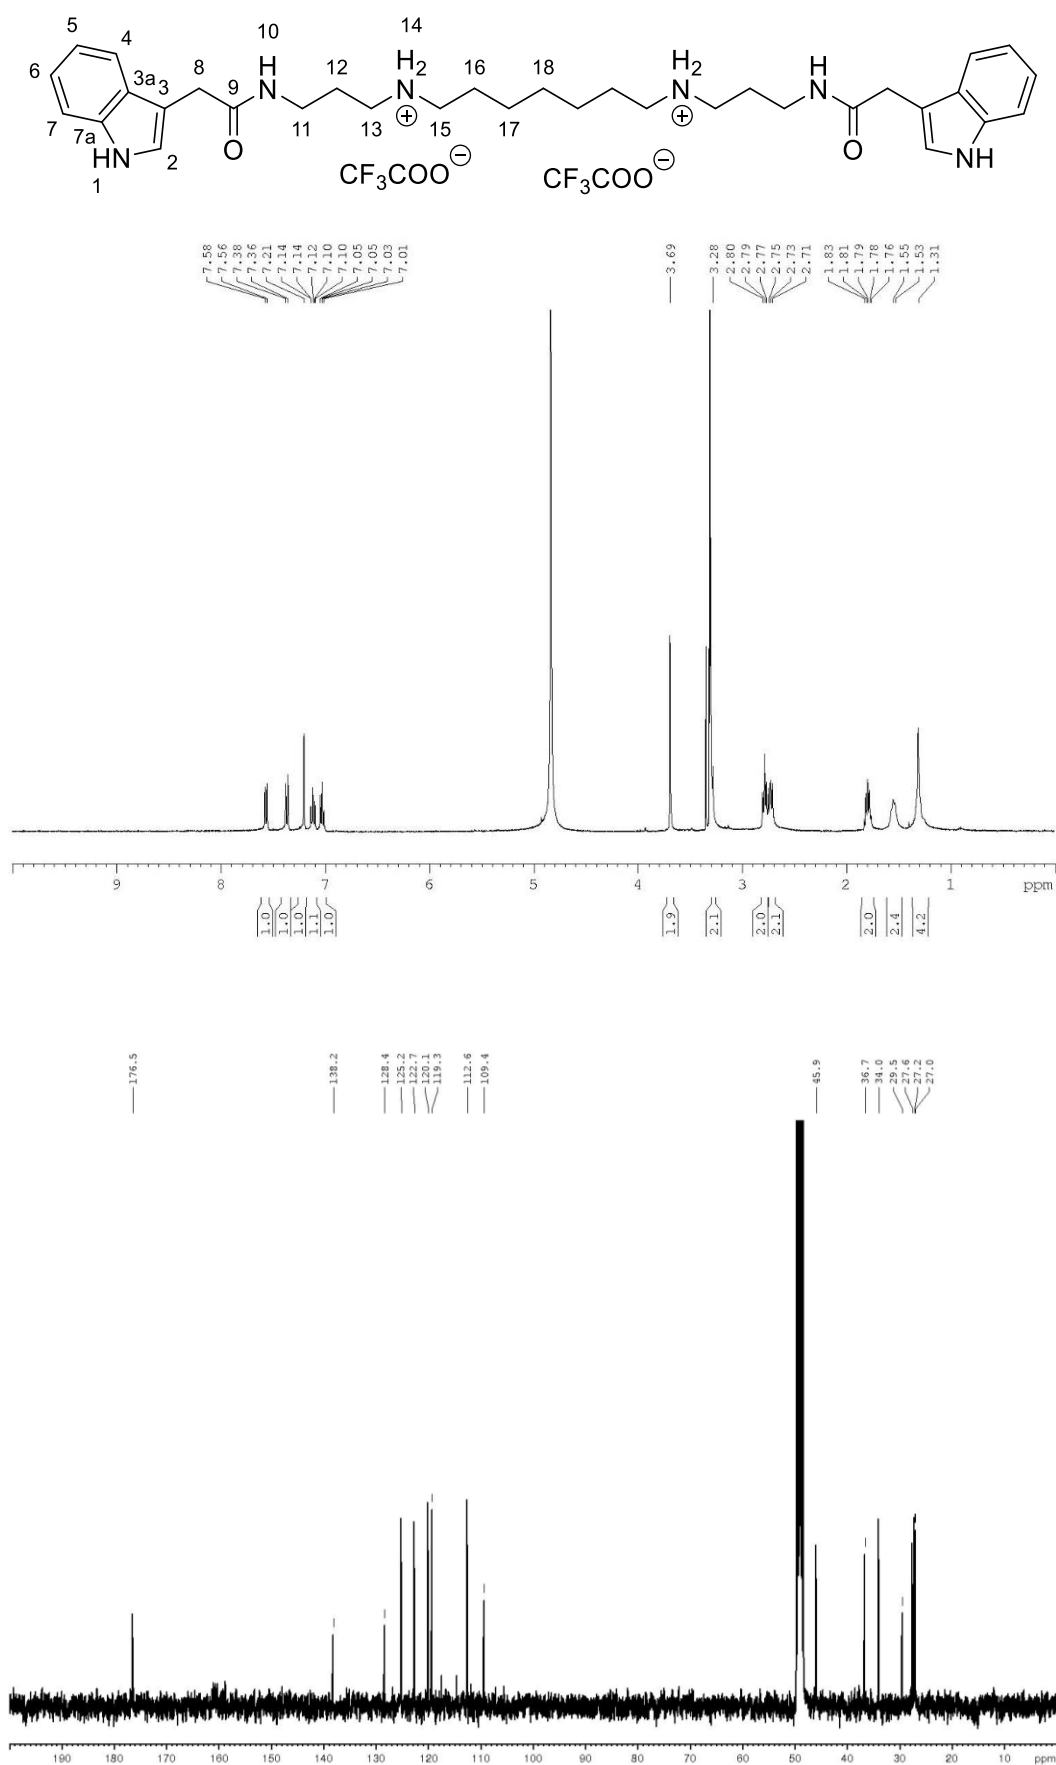

**Figure S2**  $^1\text{H}$  (CD<sub>3</sub>OD, 400 MHz) and  $^{13}\text{C}$  (CD<sub>3</sub>OD, 100 MHz) NMR spectra for **14c**

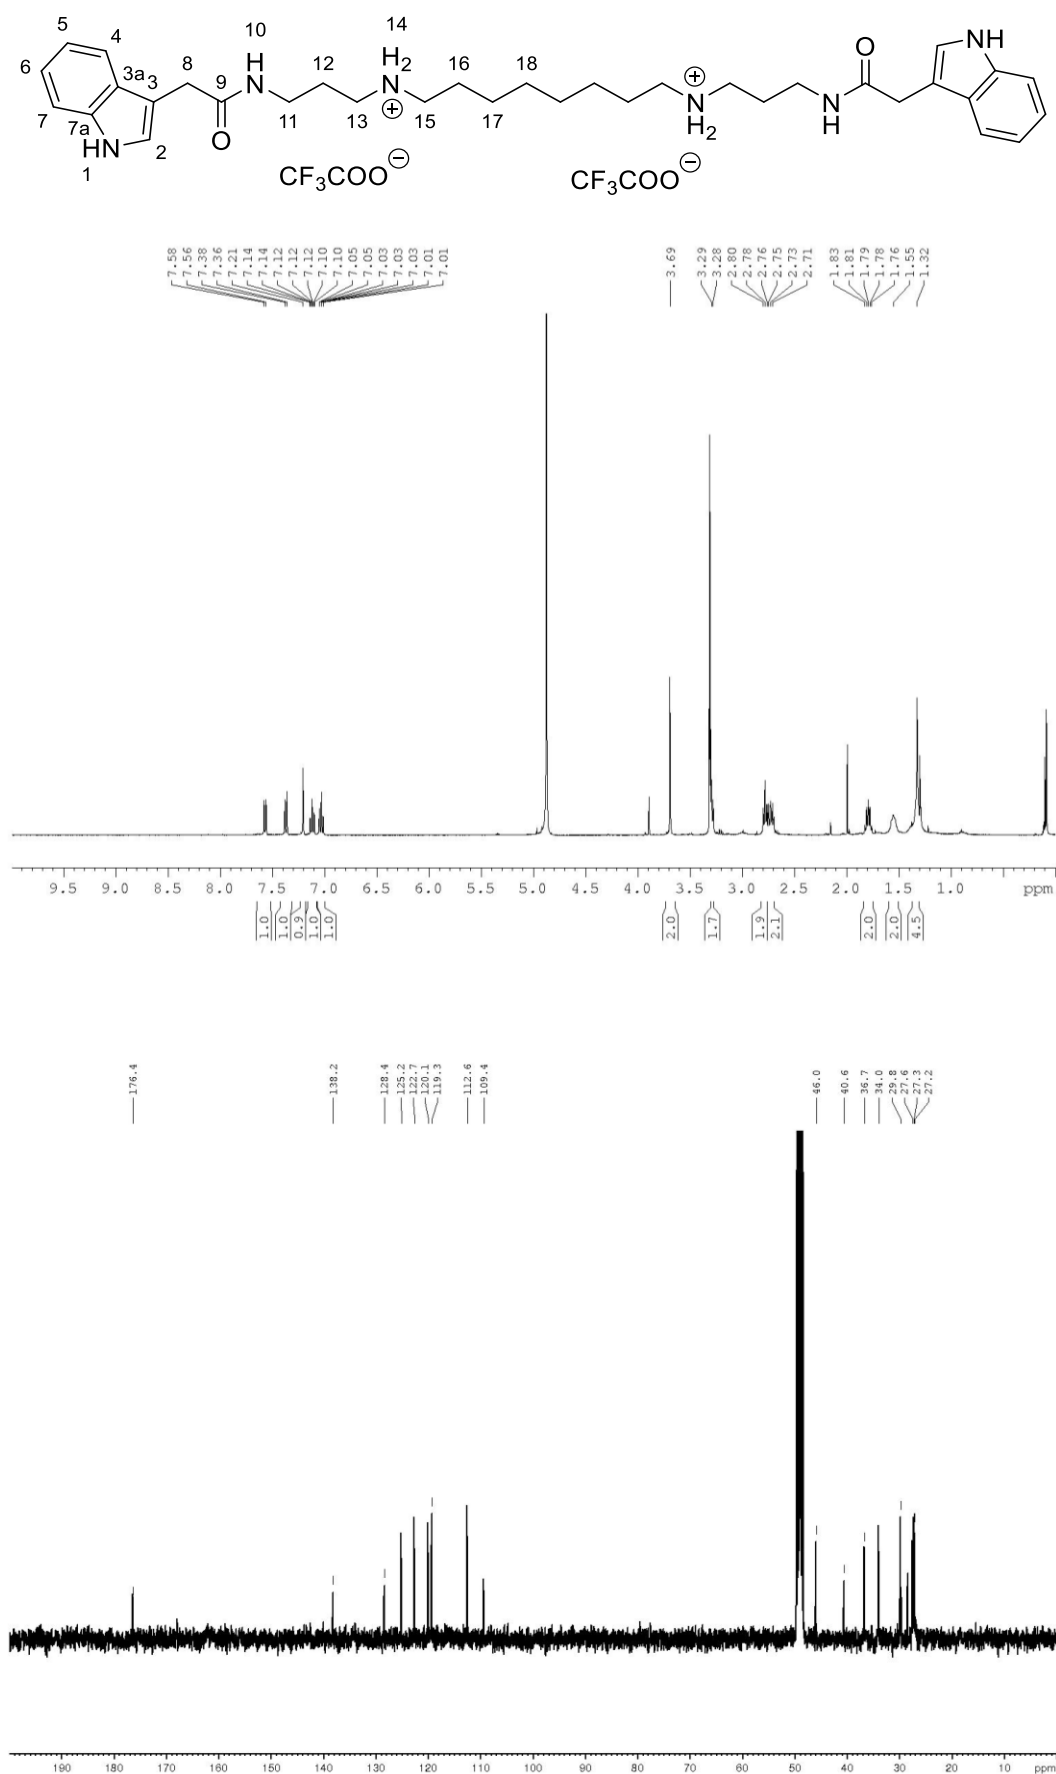

**Figure S3**  $^1\text{H}$  (CD<sub>3</sub>OD, 400 MHz) and  $^{13}\text{C}$  (CD<sub>3</sub>OD, 100 MHz) NMR spectra for **14d**

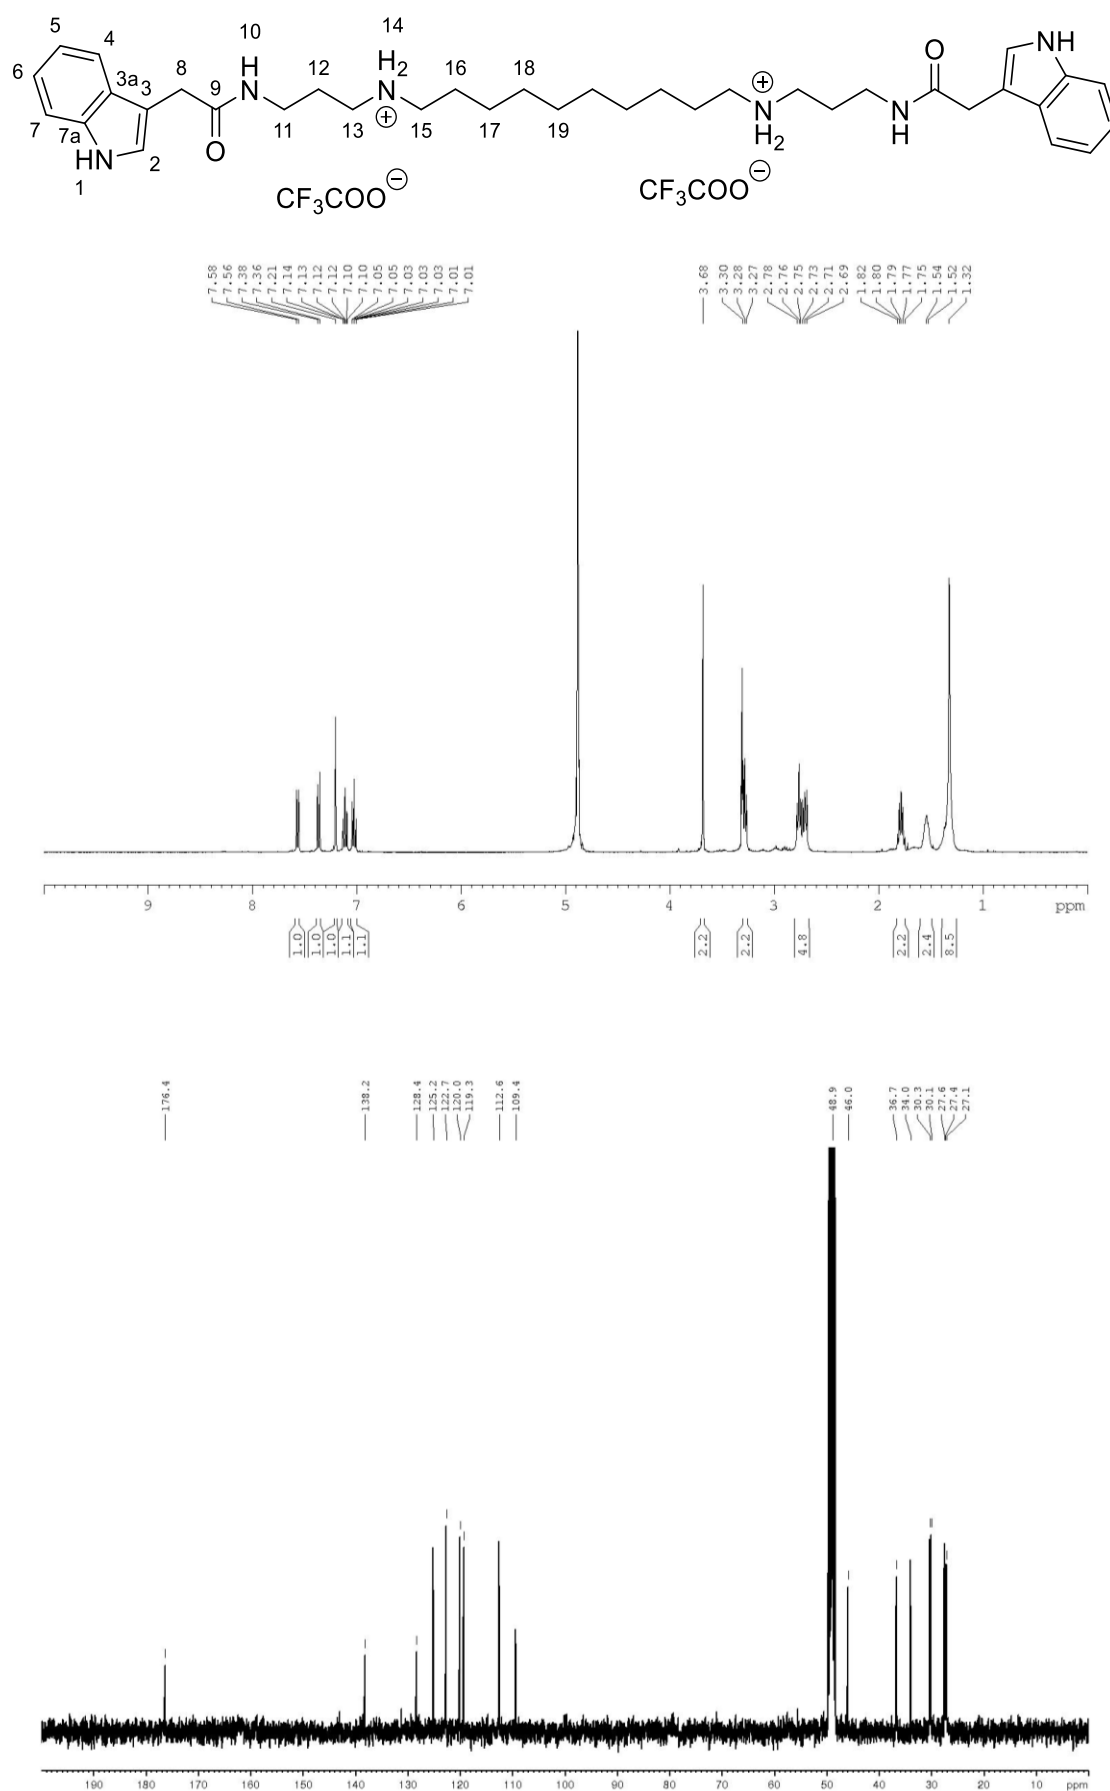

**Figure S4** <sup>1</sup>H (CD<sub>3</sub>OD, 400 MHz) and <sup>13</sup>C (CD<sub>3</sub>OD, 100 MHz) NMR spectra for **14e**

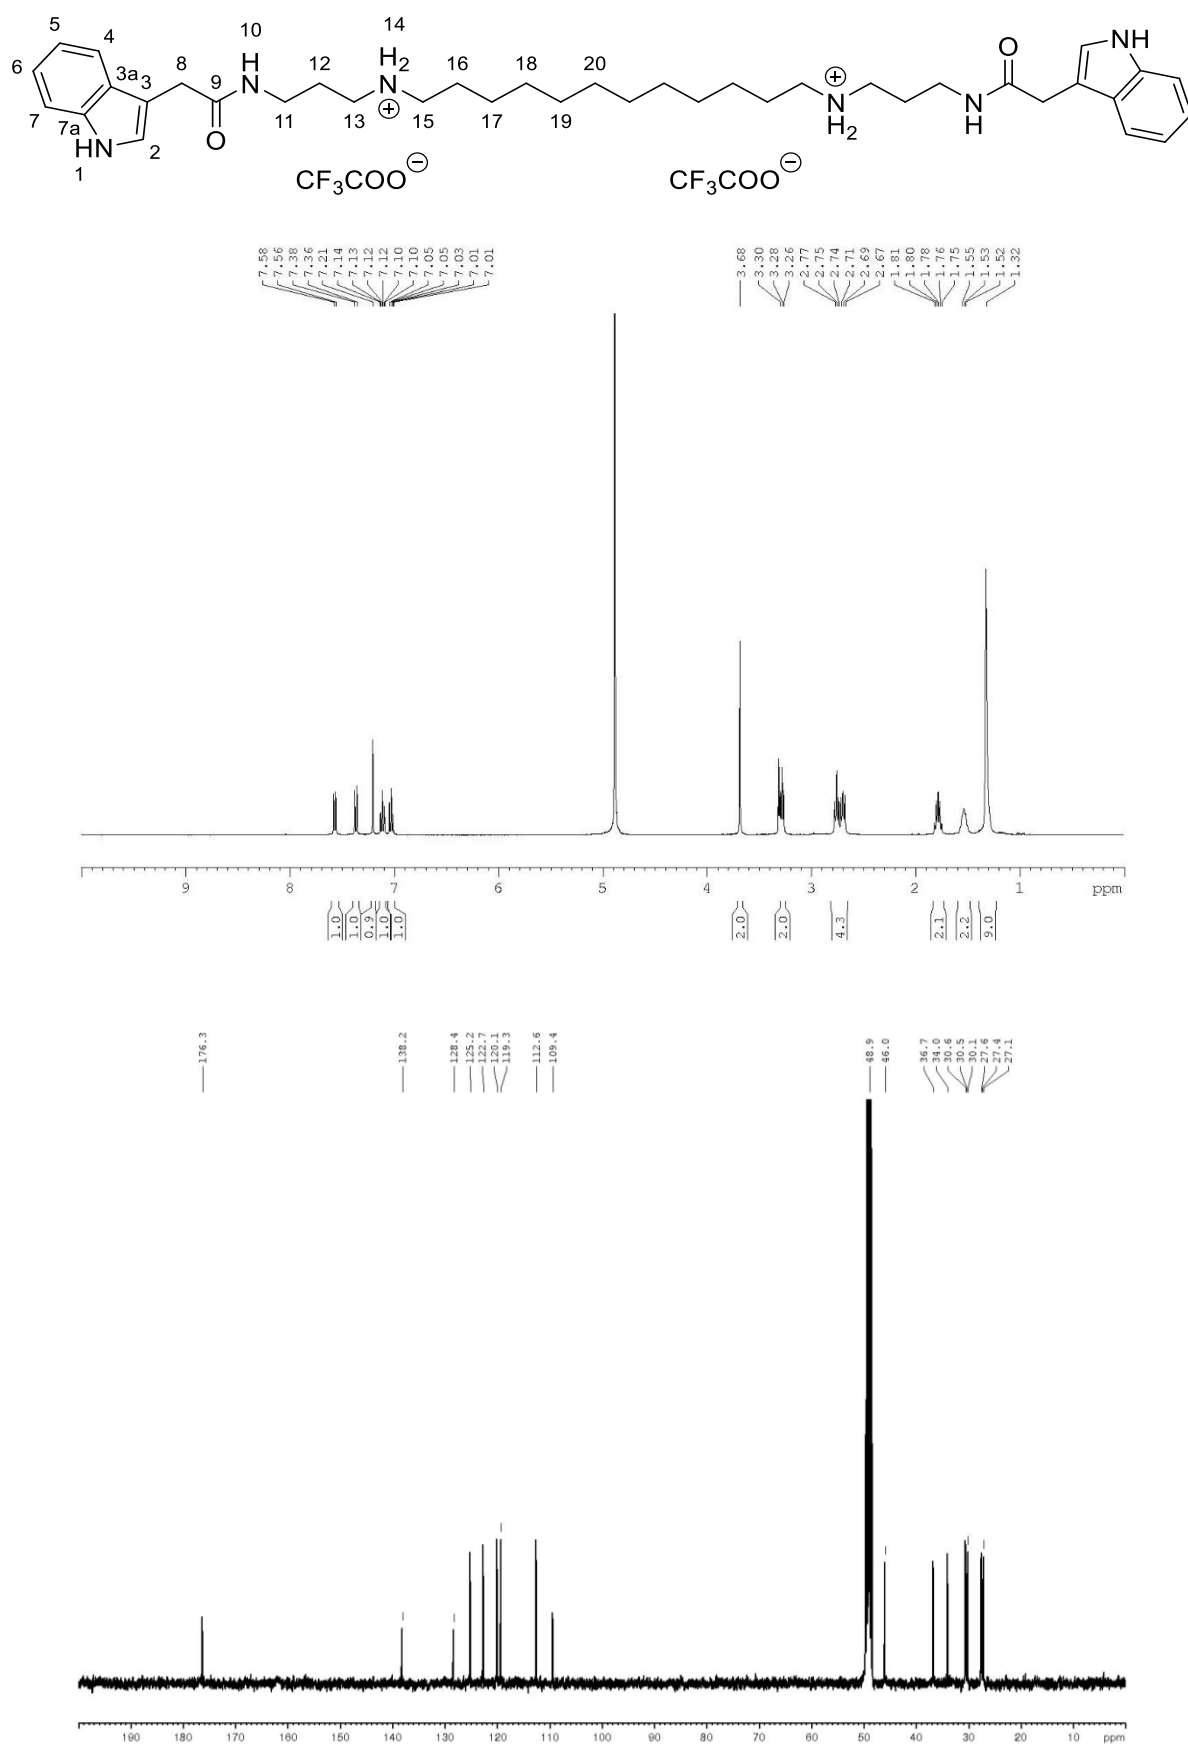

**Figure S5** <sup>1</sup>H (CD<sub>3</sub>OD, 400 MHz) and <sup>13</sup>C (CD<sub>3</sub>OD, 100 MHz) NMR spectra for **14f**

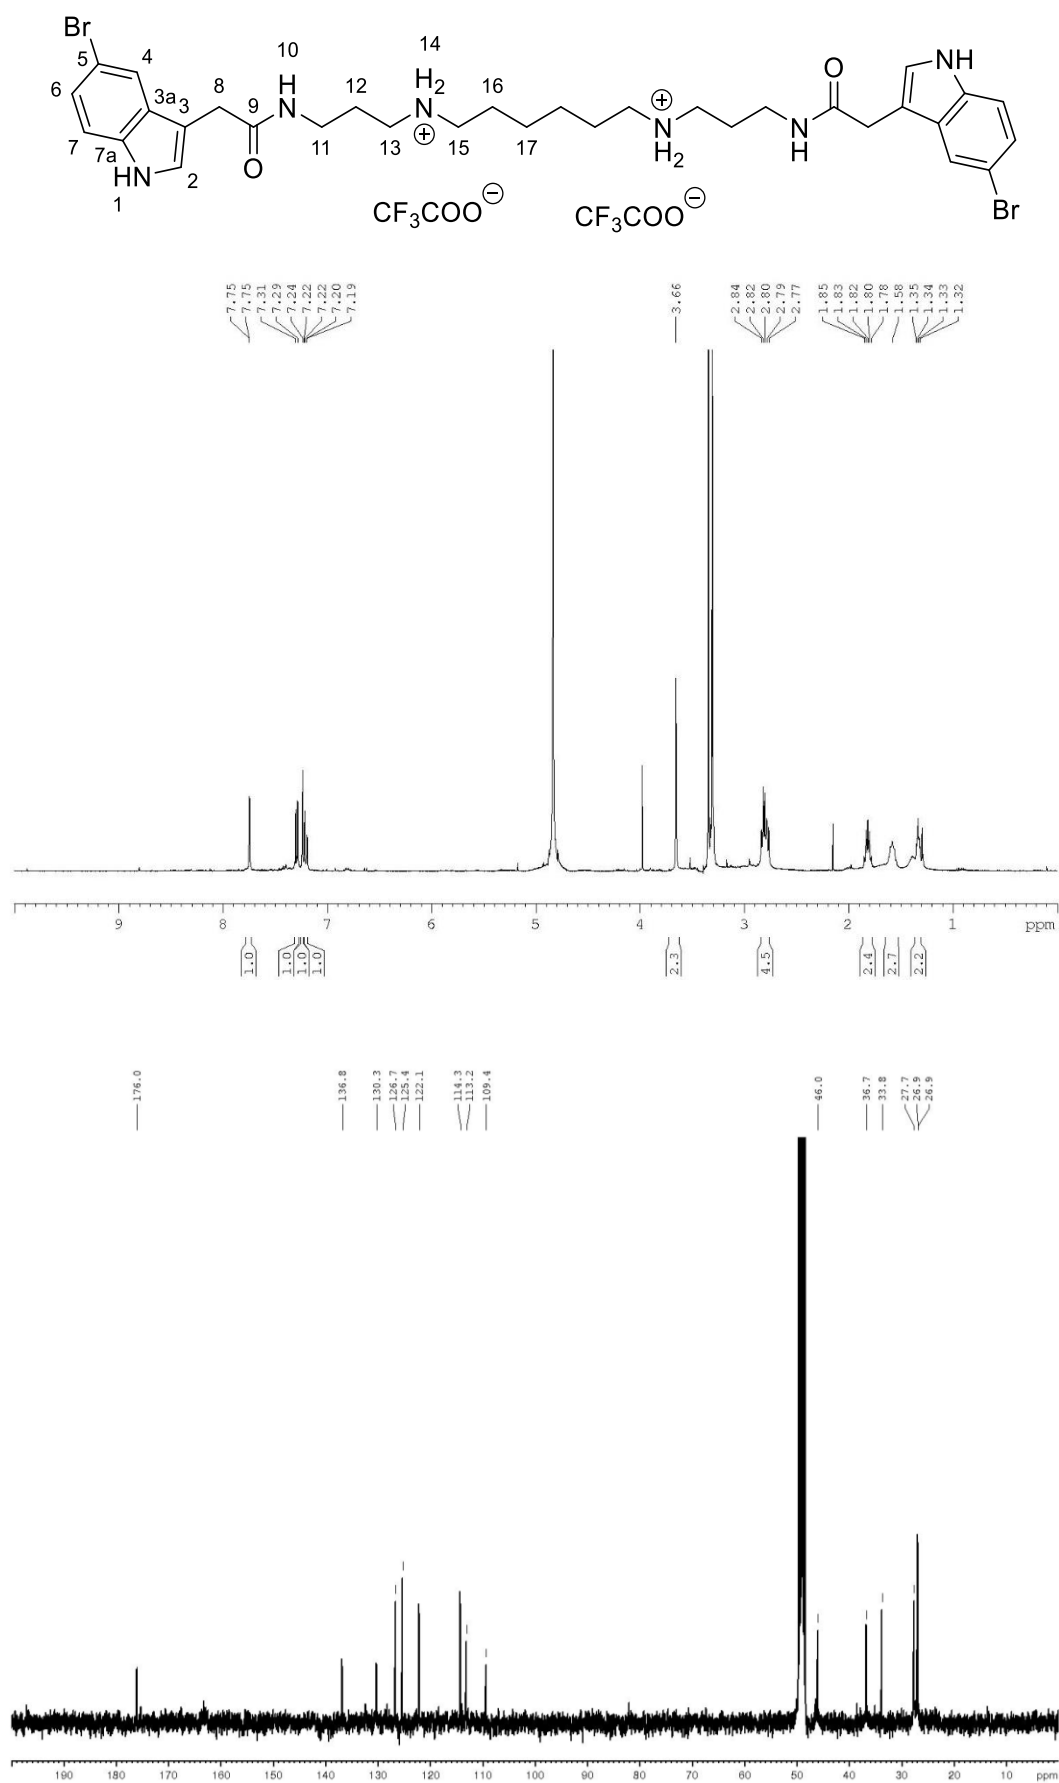

Figure S6  $^1\text{H}$  ( $\text{CD}_3\text{OD}$ , 400 MHz) and  $^{13}\text{C}$  ( $\text{CD}_3\text{OD}$ , 100 MHz) NMR spectra for **15b**



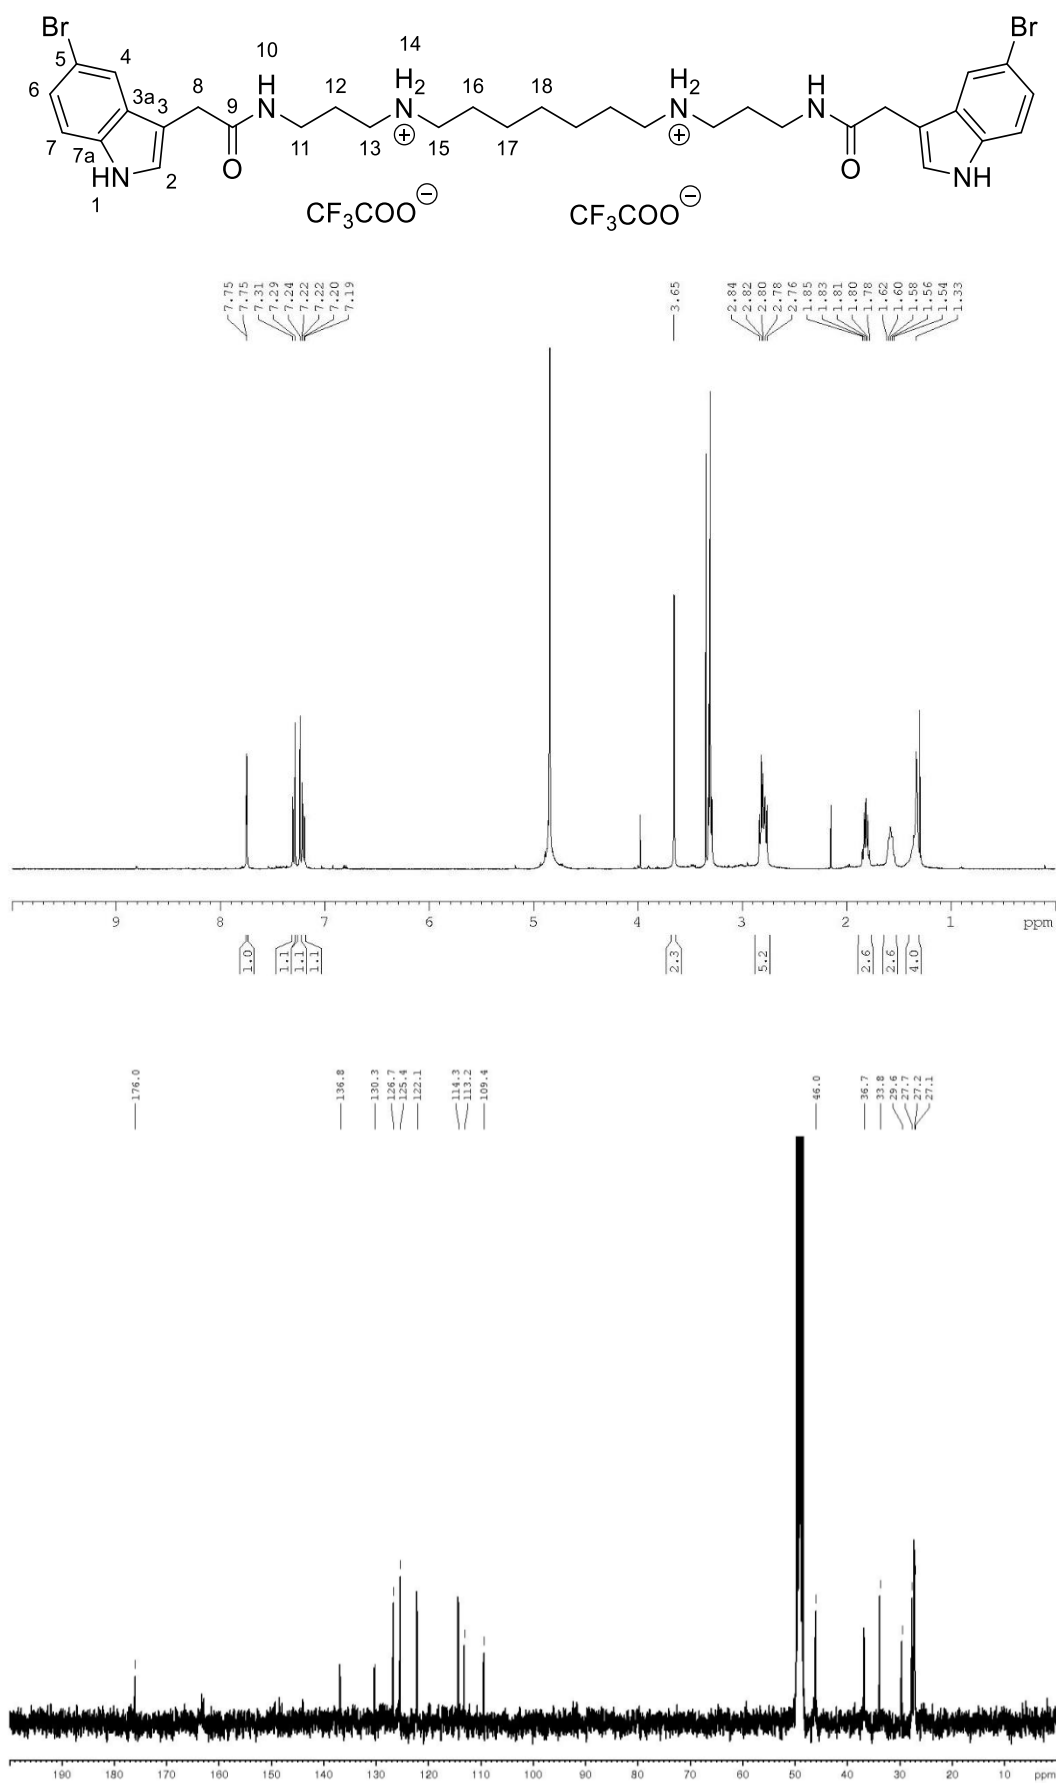

**Figure S7** <sup>1</sup>H (CD<sub>3</sub>OD, 400 MHz) and <sup>13</sup>C (CD<sub>3</sub>OD, 100 MHz) NMR spectra for **15c**

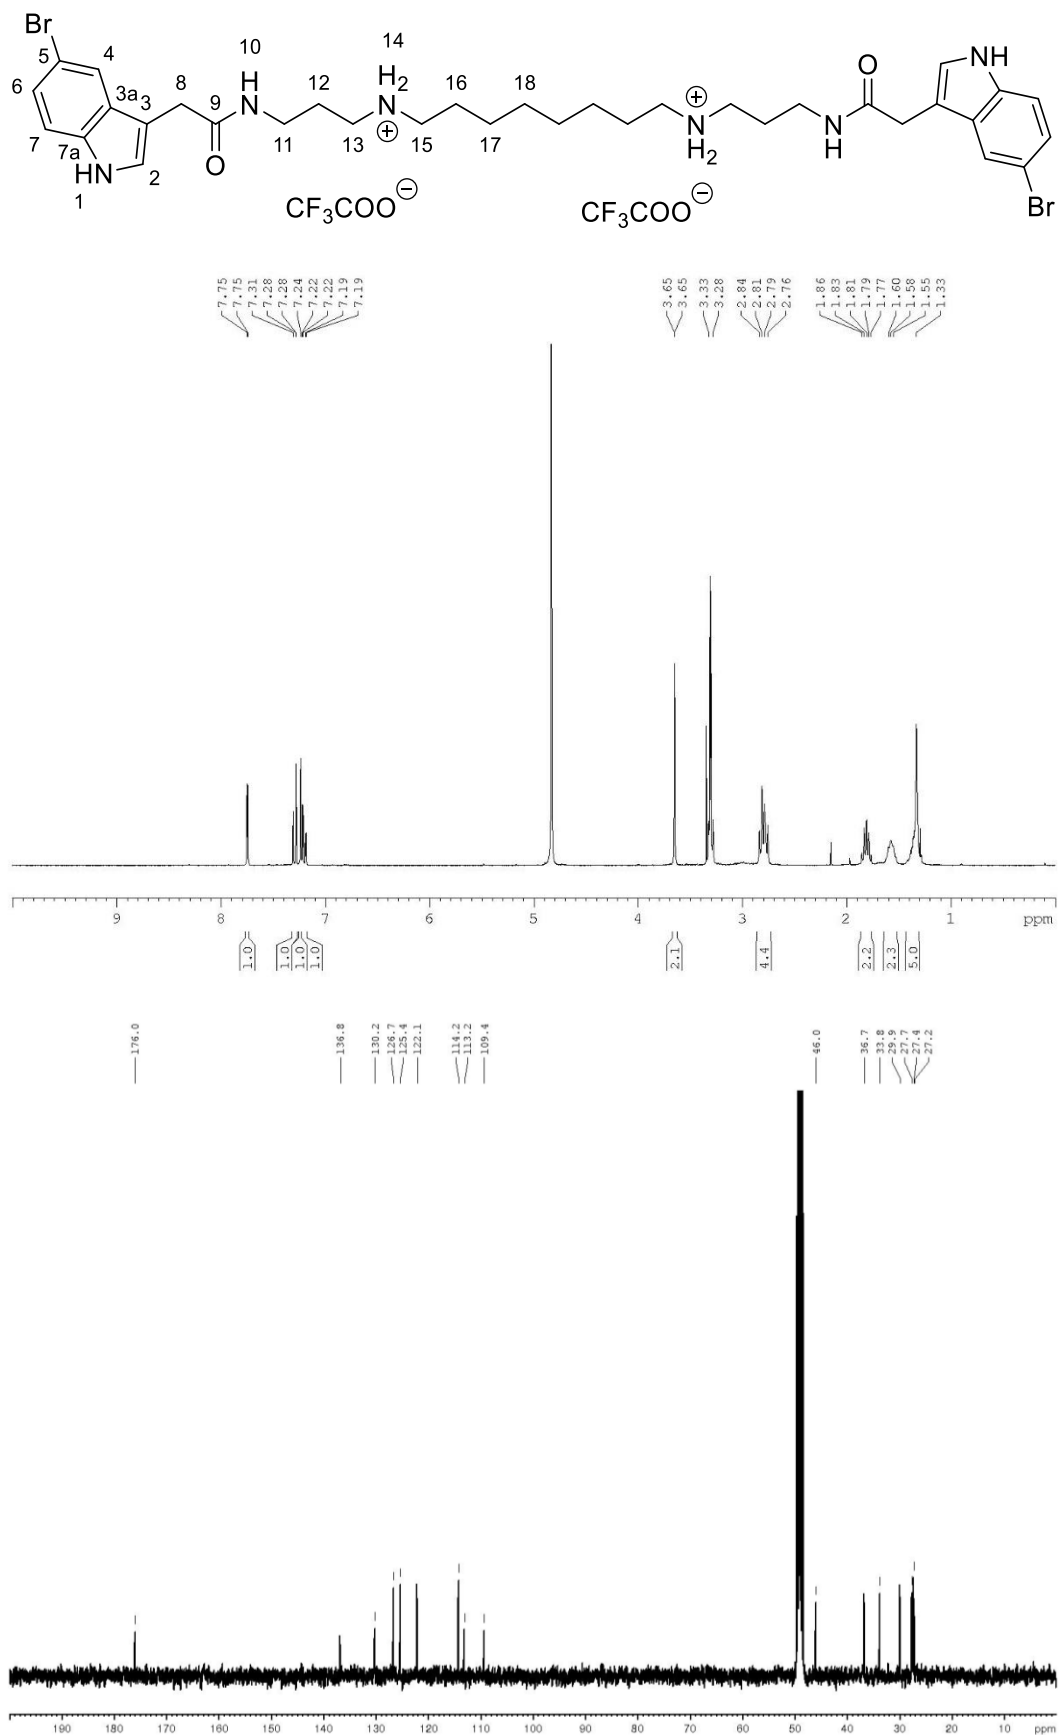

**Figure S8** <sup>1</sup>H (CD<sub>3</sub>OD, 400 MHz) and <sup>13</sup>C (CD<sub>3</sub>OD, 100 MHz) NMR spectra for **15d**

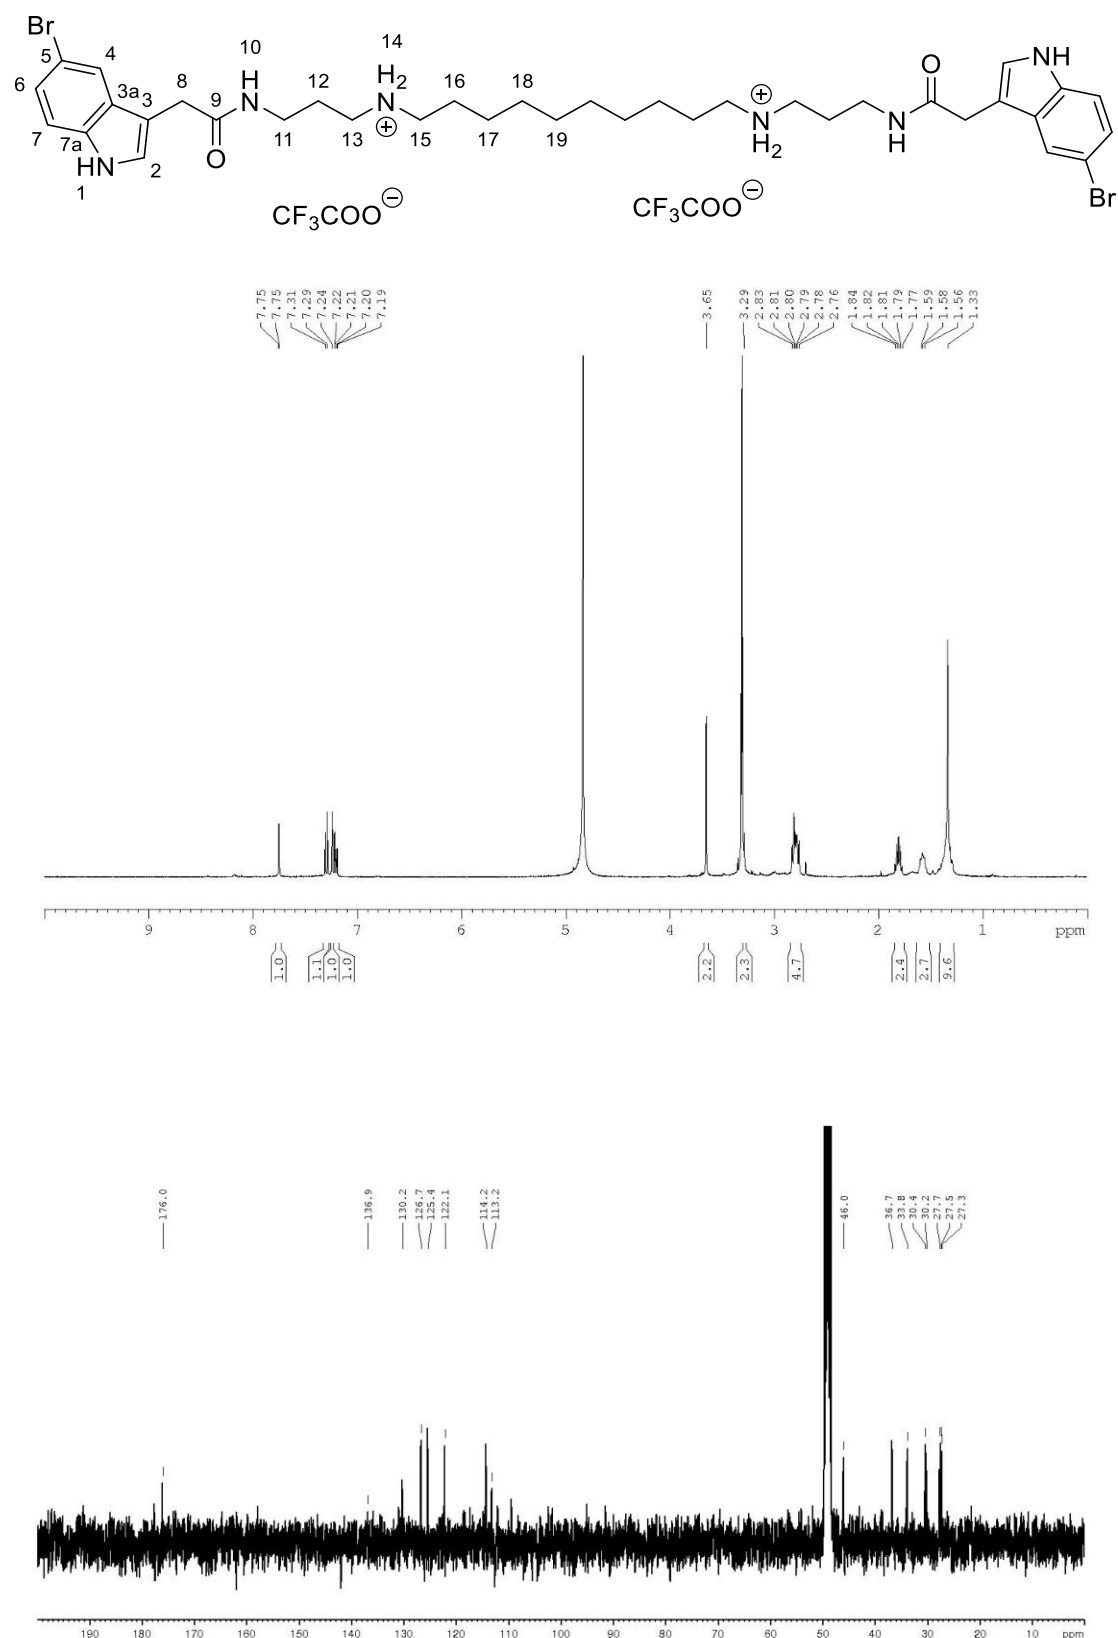

**Figure S9**  $^1\text{H}$  (CD<sub>3</sub>OD, 400 MHz) and  $^{13}\text{C}$  (CD<sub>3</sub>OD, 100 MHz) NMR spectra for **15e**

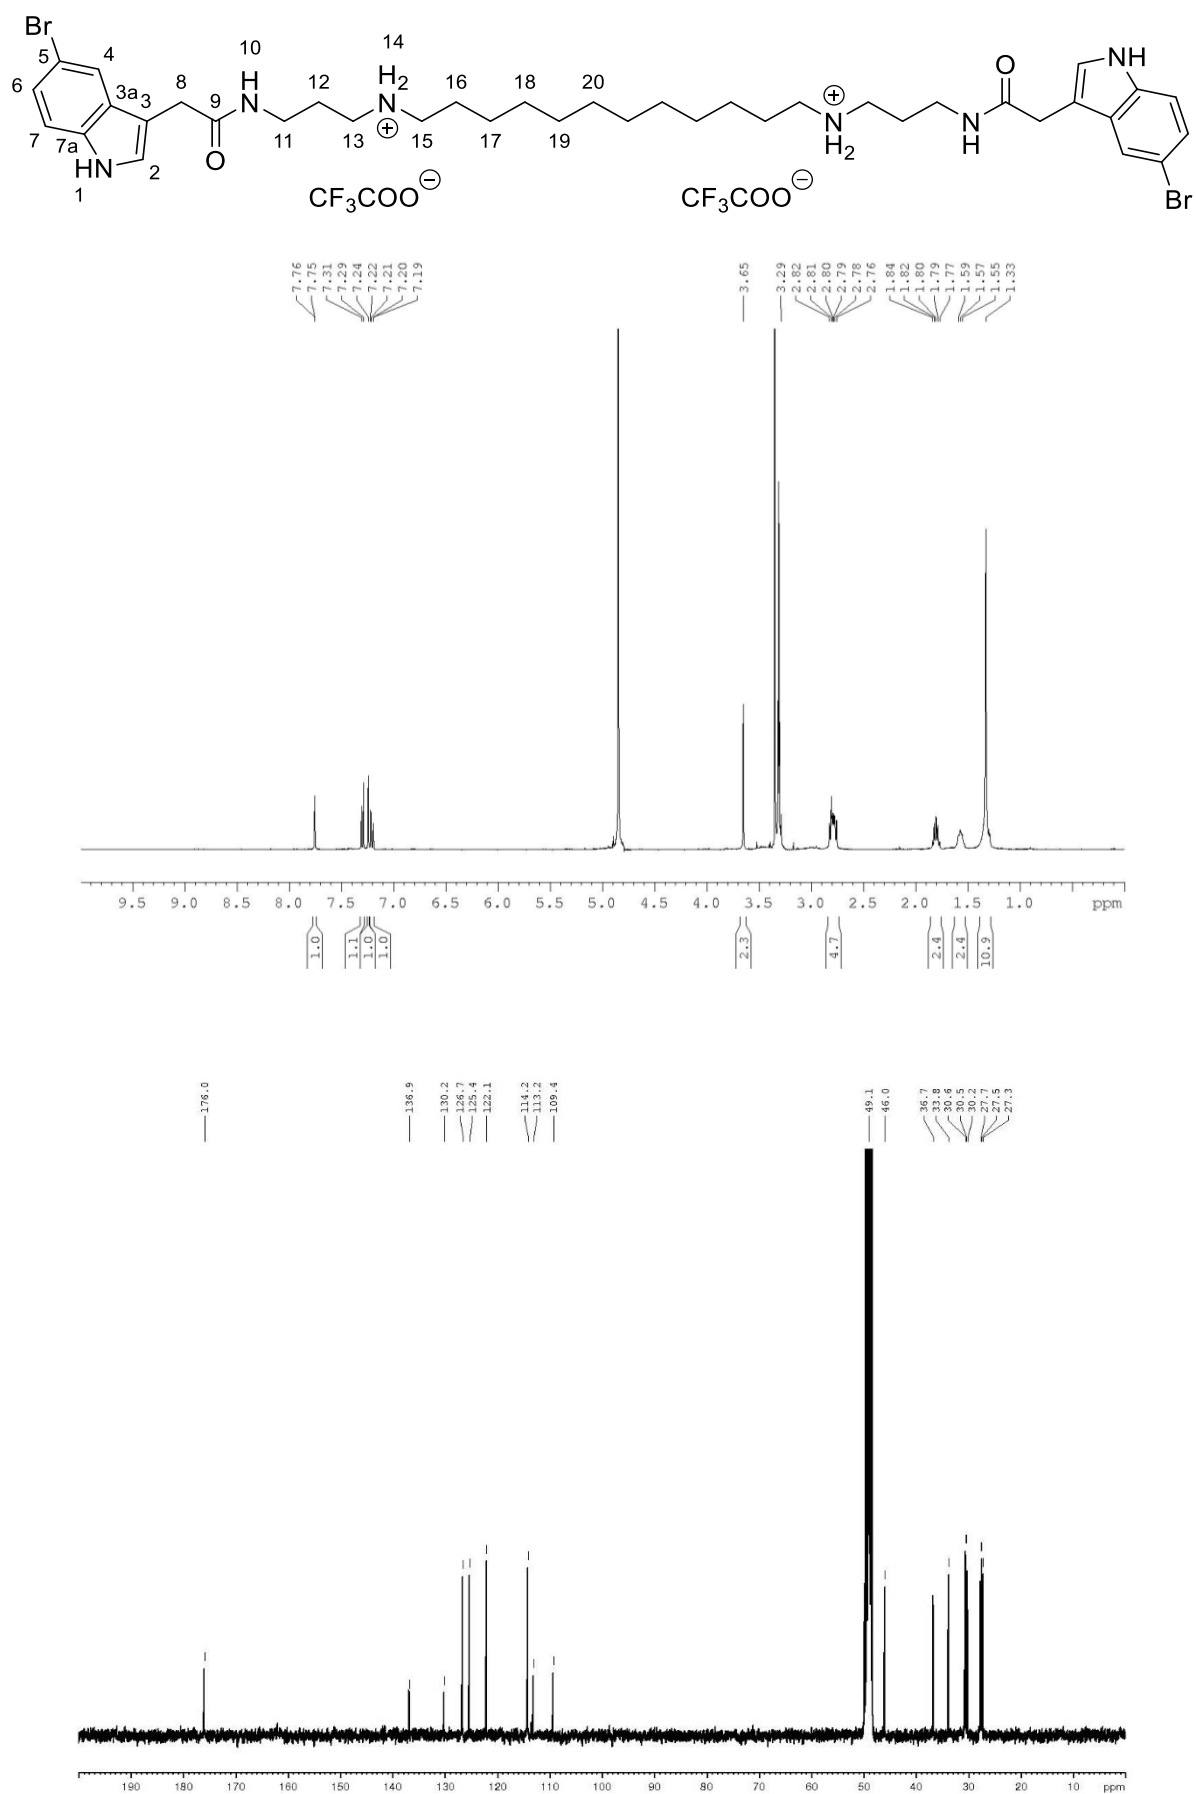

**Figure S10** <sup>1</sup>H (CD<sub>3</sub>OD, 400 MHz) and <sup>13</sup>C (CD<sub>3</sub>OD, 100 MHz) NMR spectra for **15f**

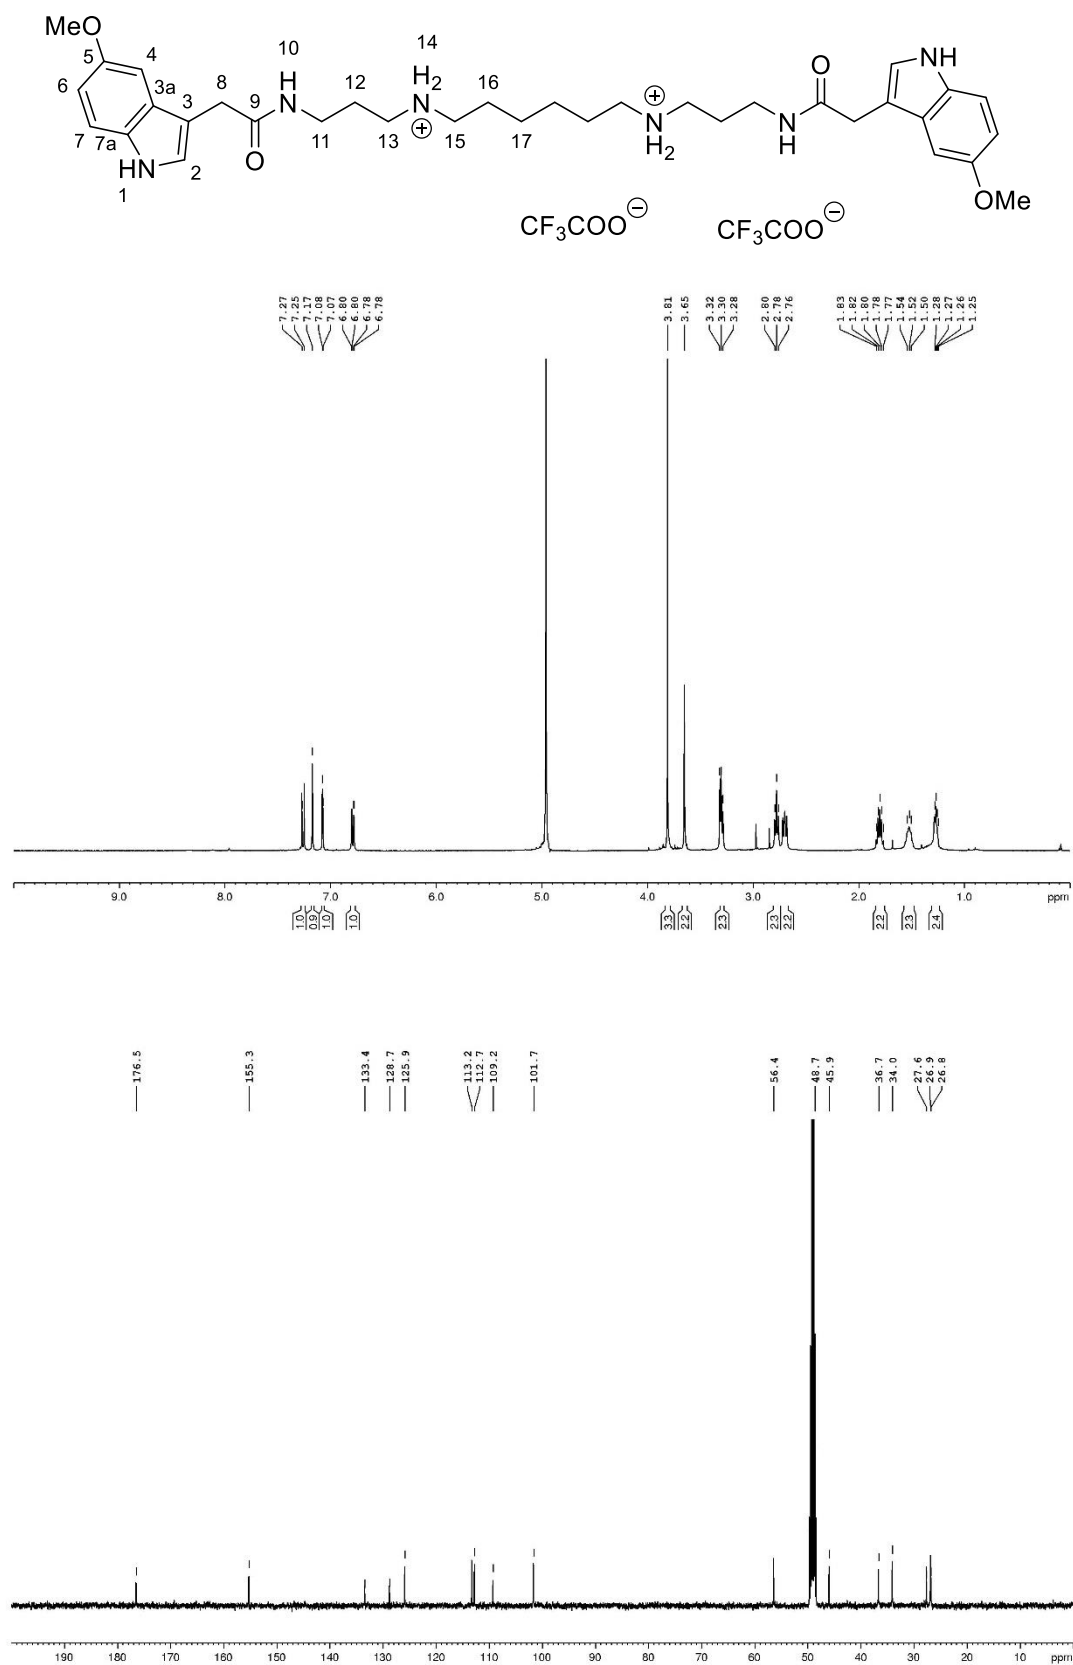

**Figure S11** <sup>1</sup>H (CD<sub>3</sub>OD, 400 MHz) and <sup>13</sup>C (CD<sub>3</sub>OD, 100 MHz) NMR spectra for **16b**

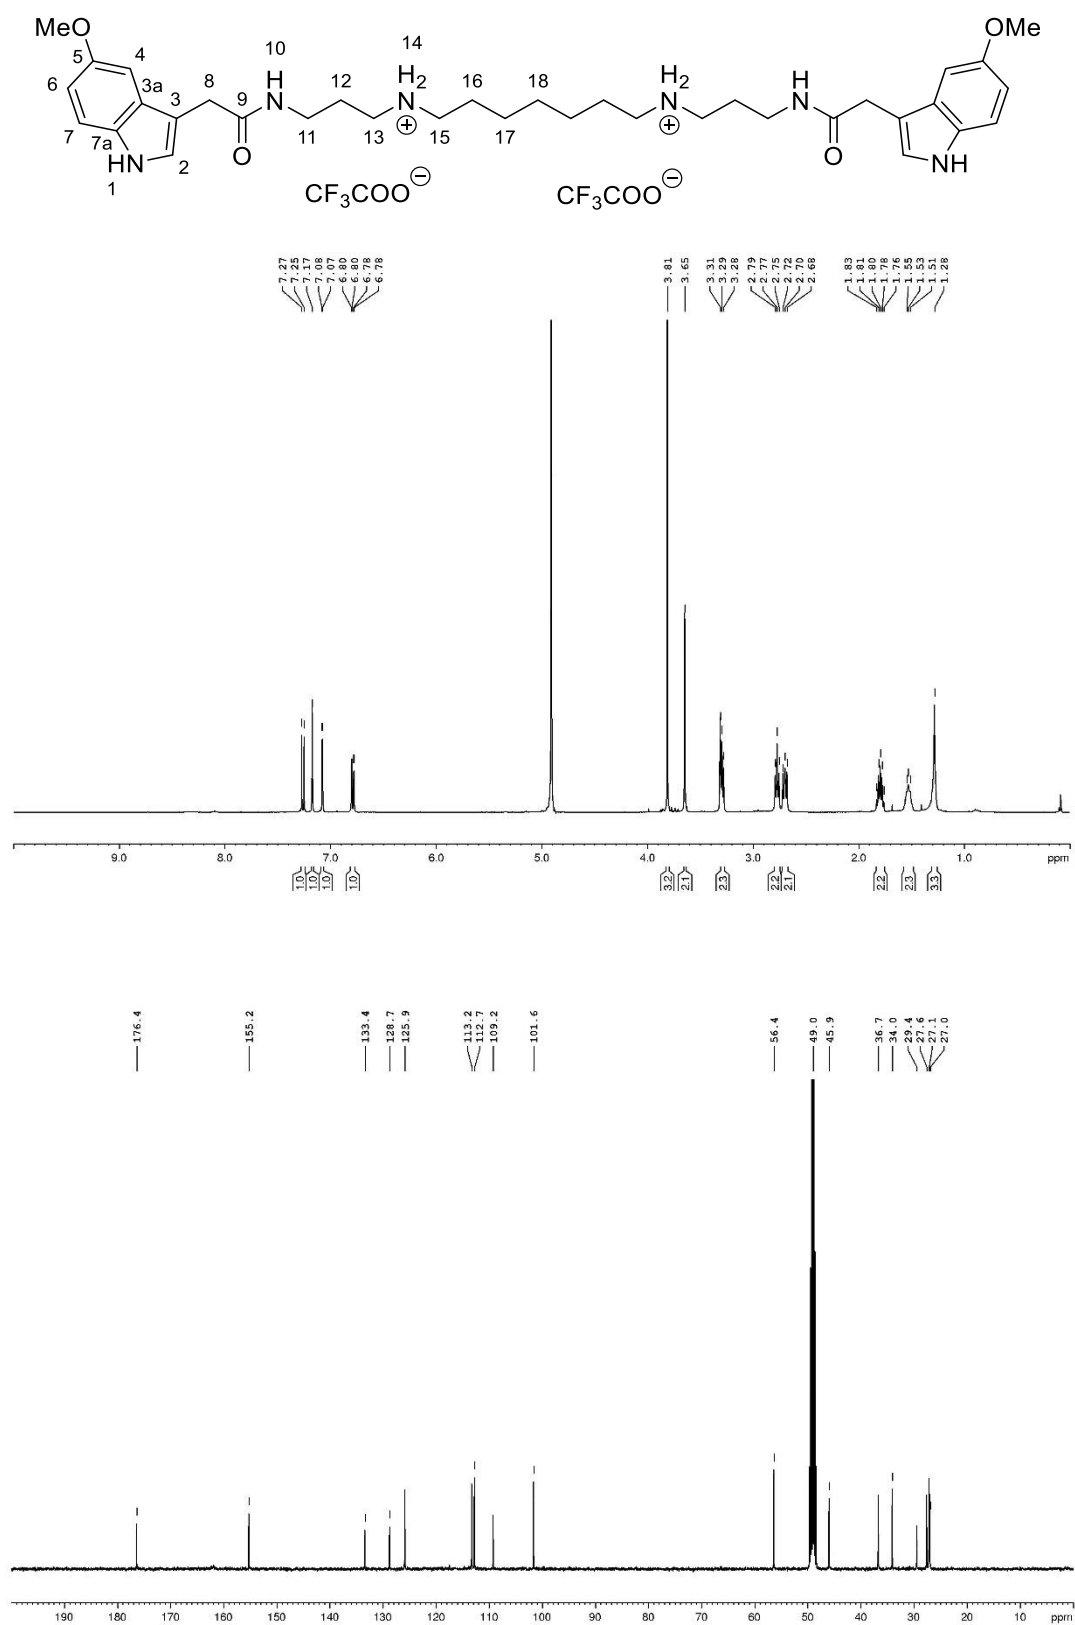

**Figure S12** <sup>1</sup>H (CD<sub>3</sub>OD, 400 MHz) and <sup>13</sup>C (CD<sub>3</sub>OD, 100 MHz) NMR spectra for **16c**

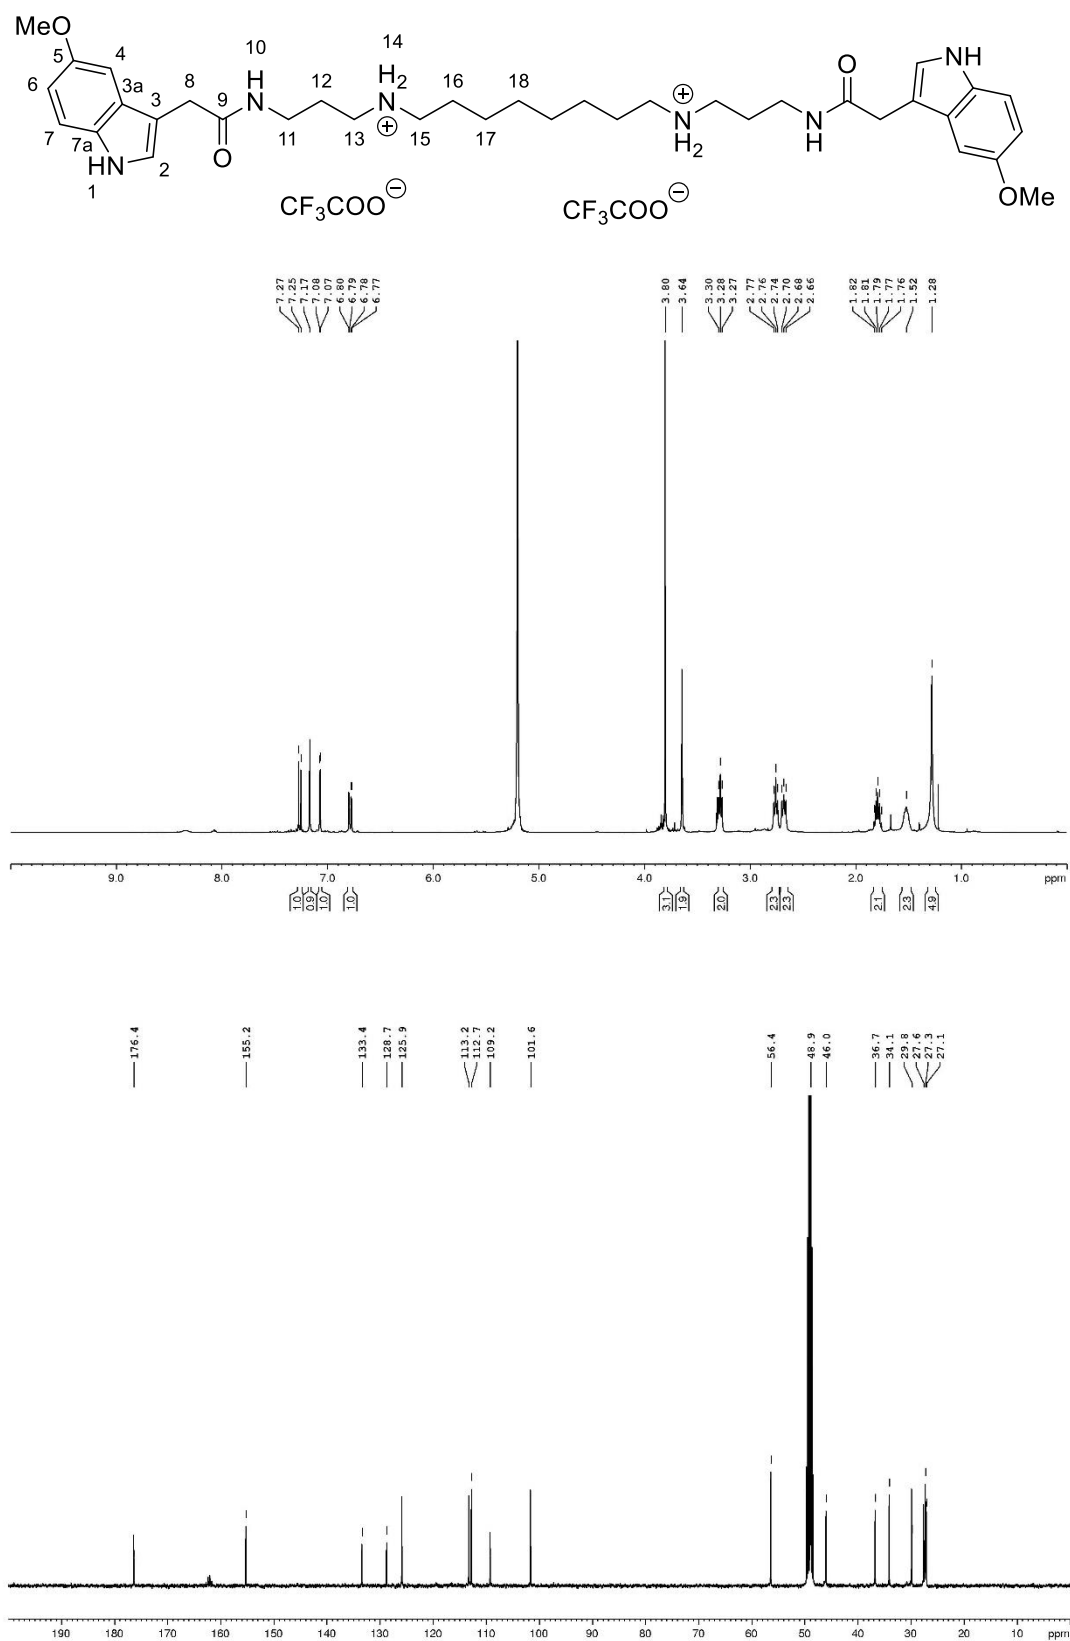

**Figure S13** <sup>1</sup>H (CD<sub>3</sub>OD, 400 MHz) and <sup>13</sup>C (CD<sub>3</sub>OD, 100 MHz) NMR spectra for **16d**

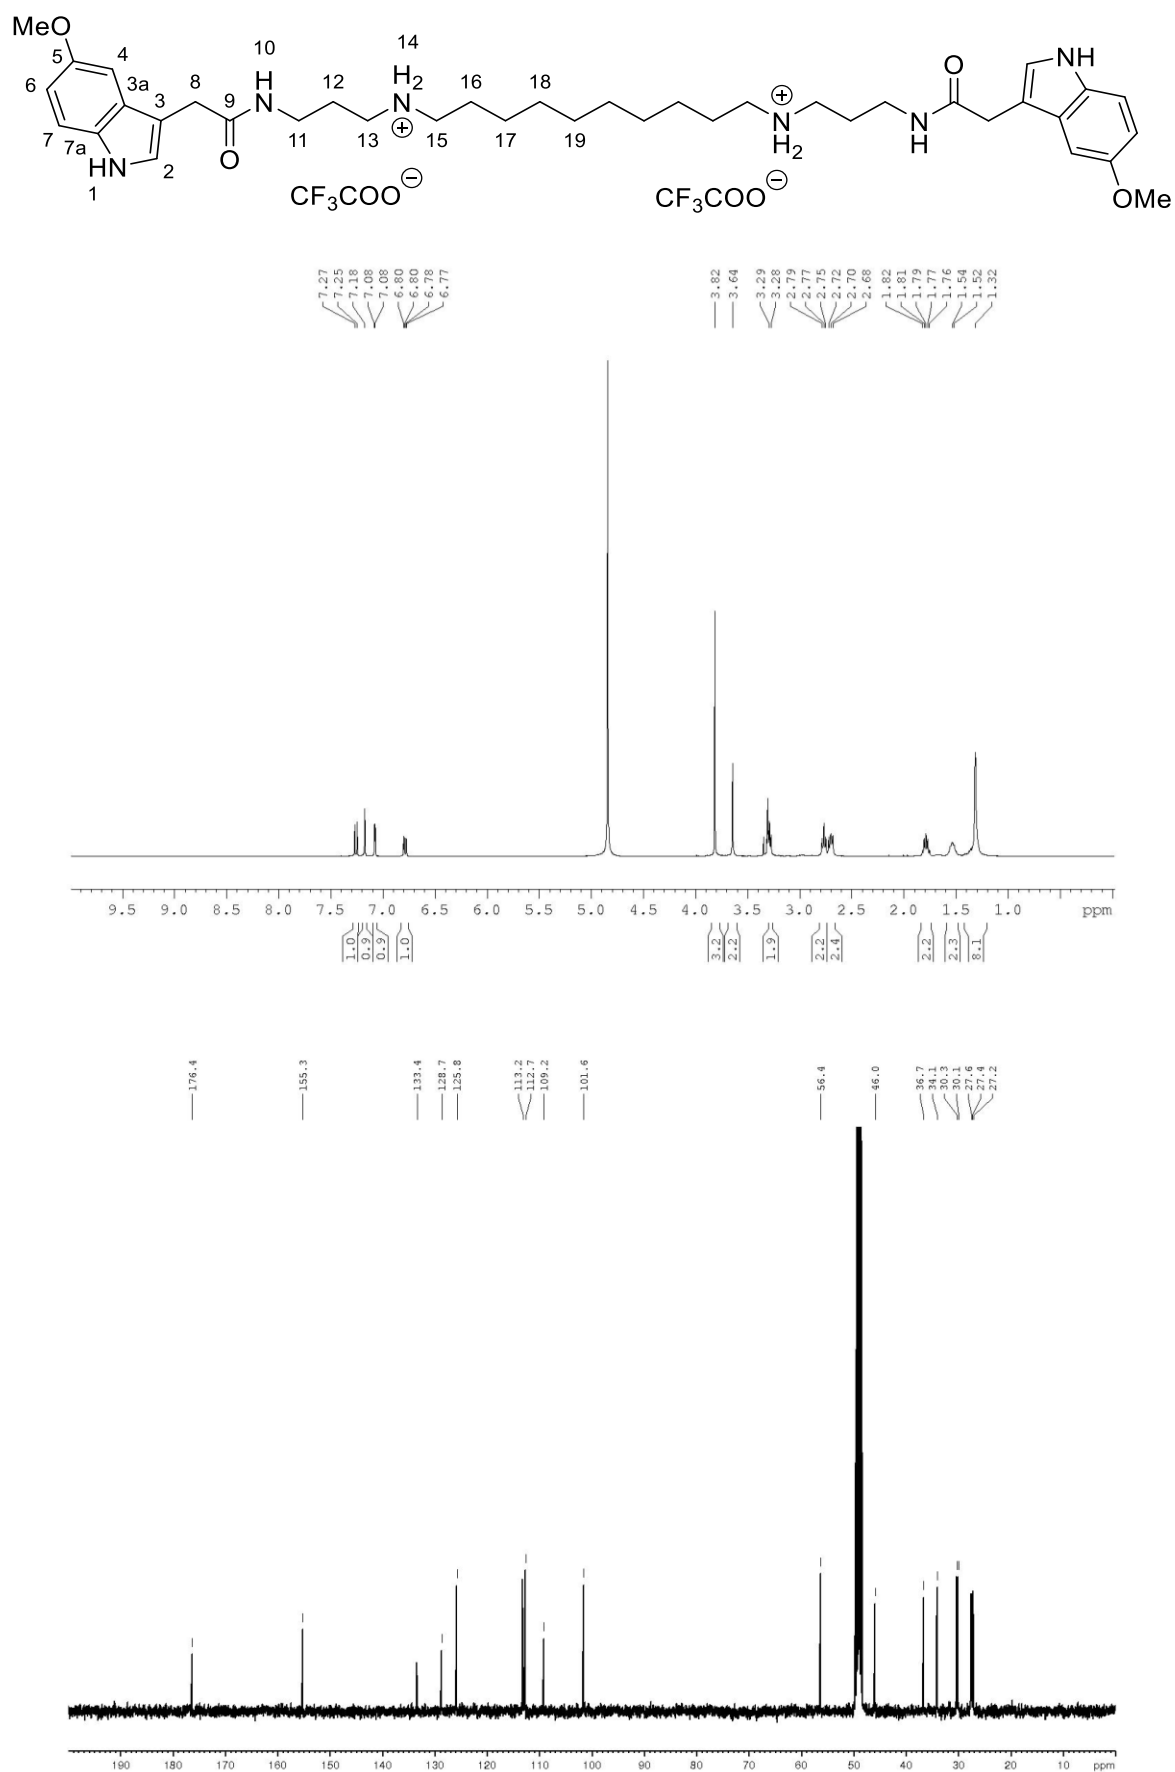

**Figure S14**  $^1\text{H}$  ( $\text{CD}_3\text{OD}$ , 400 MHz) and  $^{13}\text{C}$  ( $\text{CD}_3\text{OD}$ , 100 MHz) NMR spectra for **16e**



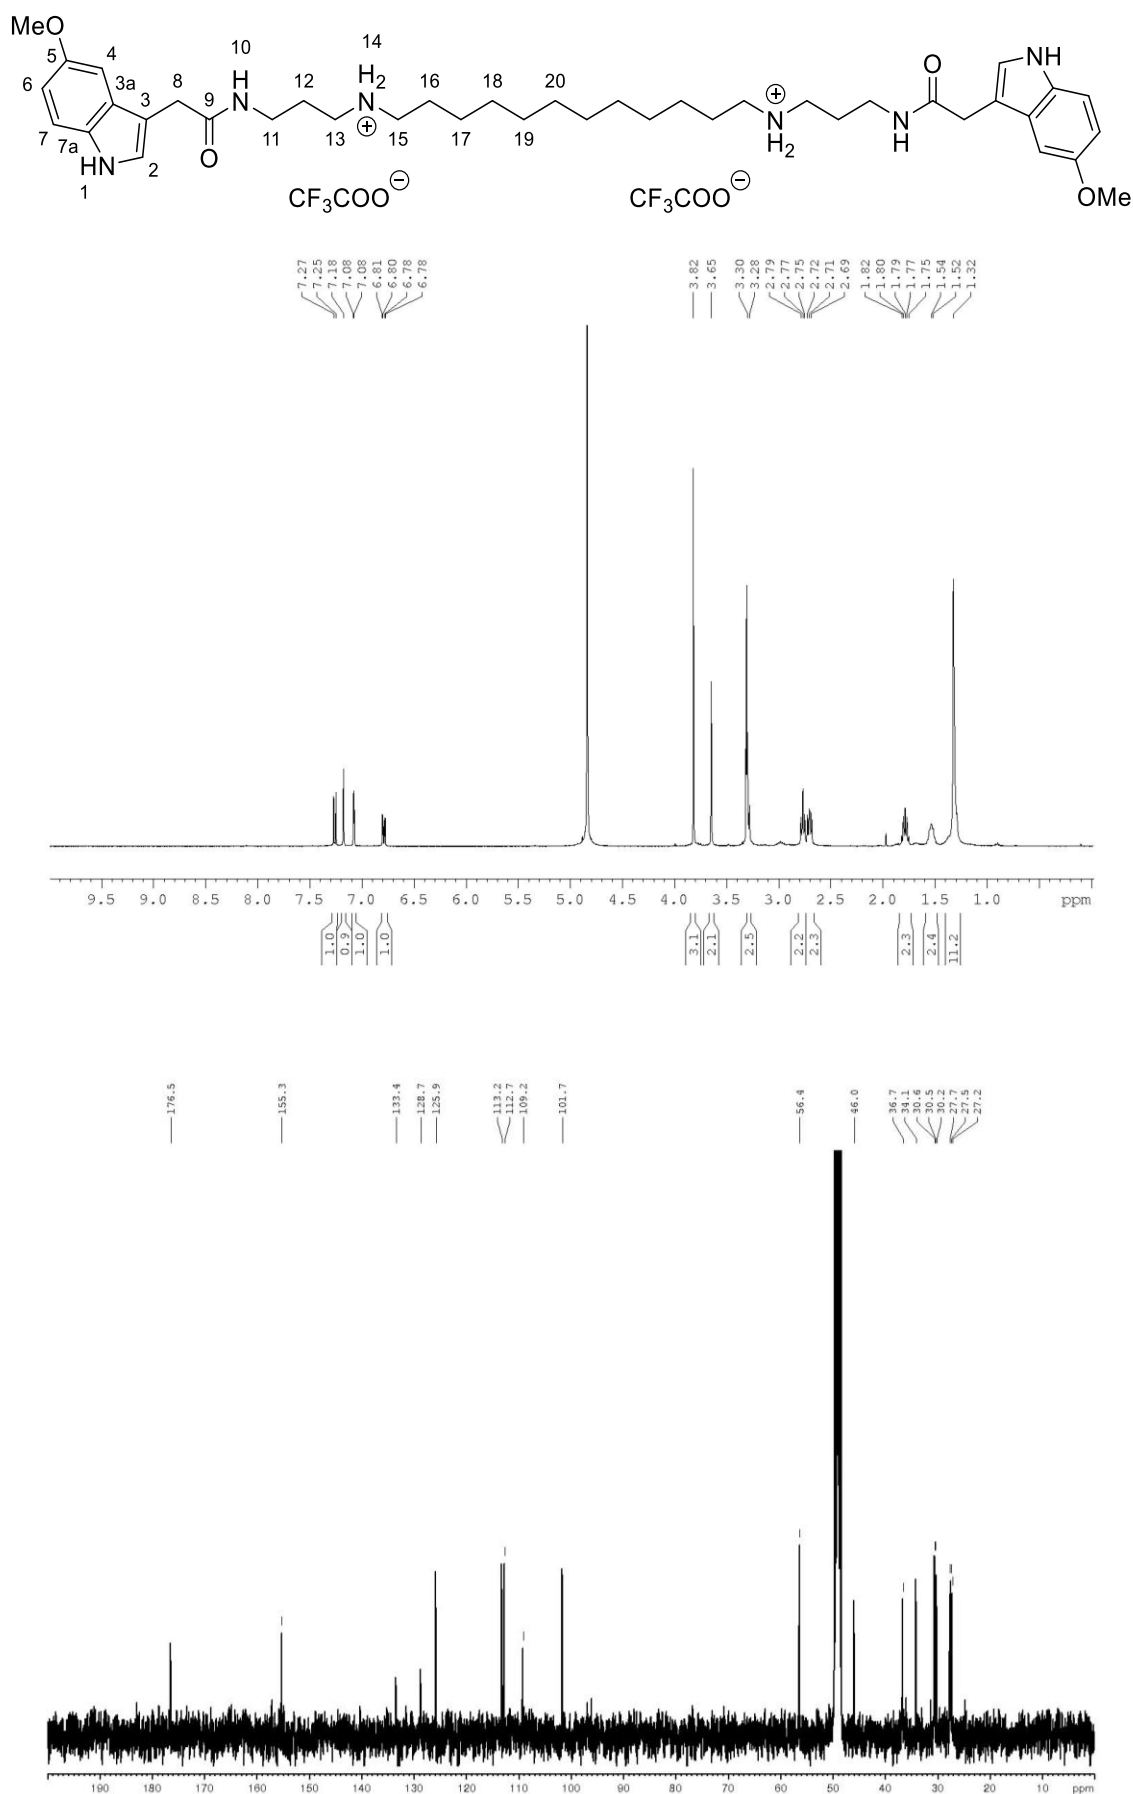

**Figure S15** <sup>1</sup>H (CD<sub>3</sub>OD, 400 MHz) and <sup>13</sup>C (CD<sub>3</sub>OD, 100 MHz) NMR spectra for **16f**

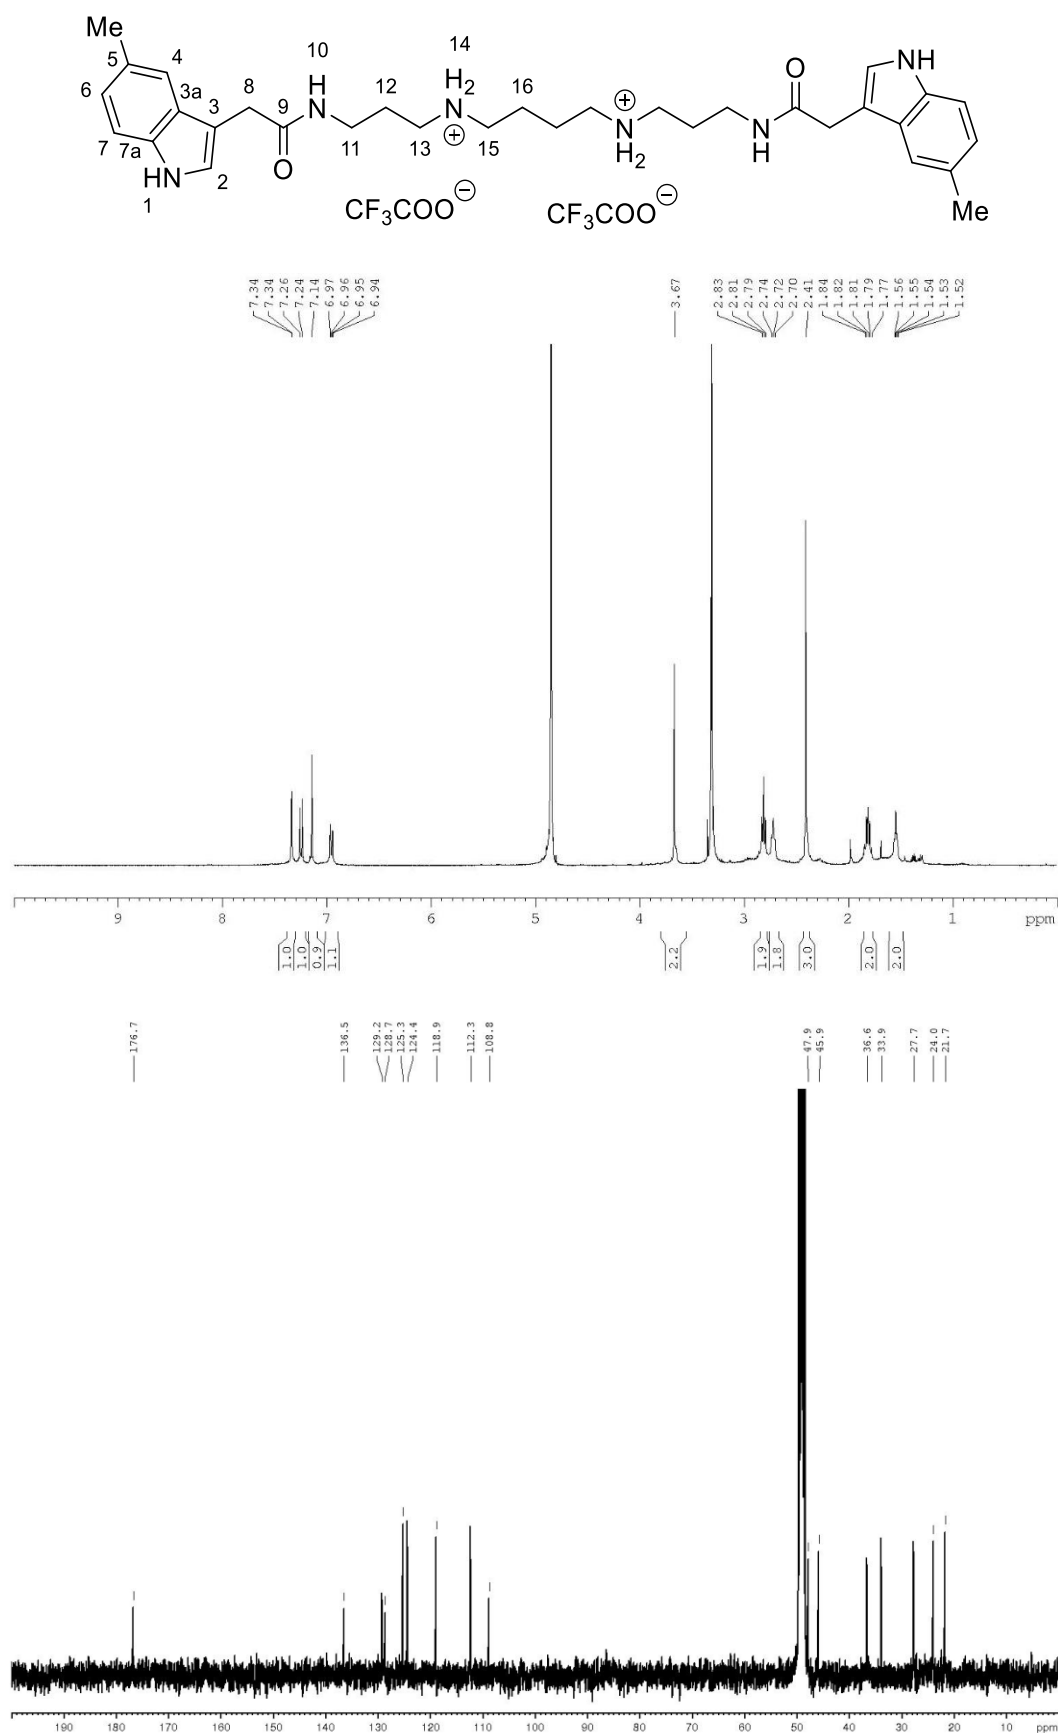

**Figure S16** <sup>1</sup>H (CD<sub>3</sub>OD, 400 MHz) and <sup>13</sup>C (CD<sub>3</sub>OD, 100 MHz) NMR spectra for **17a**

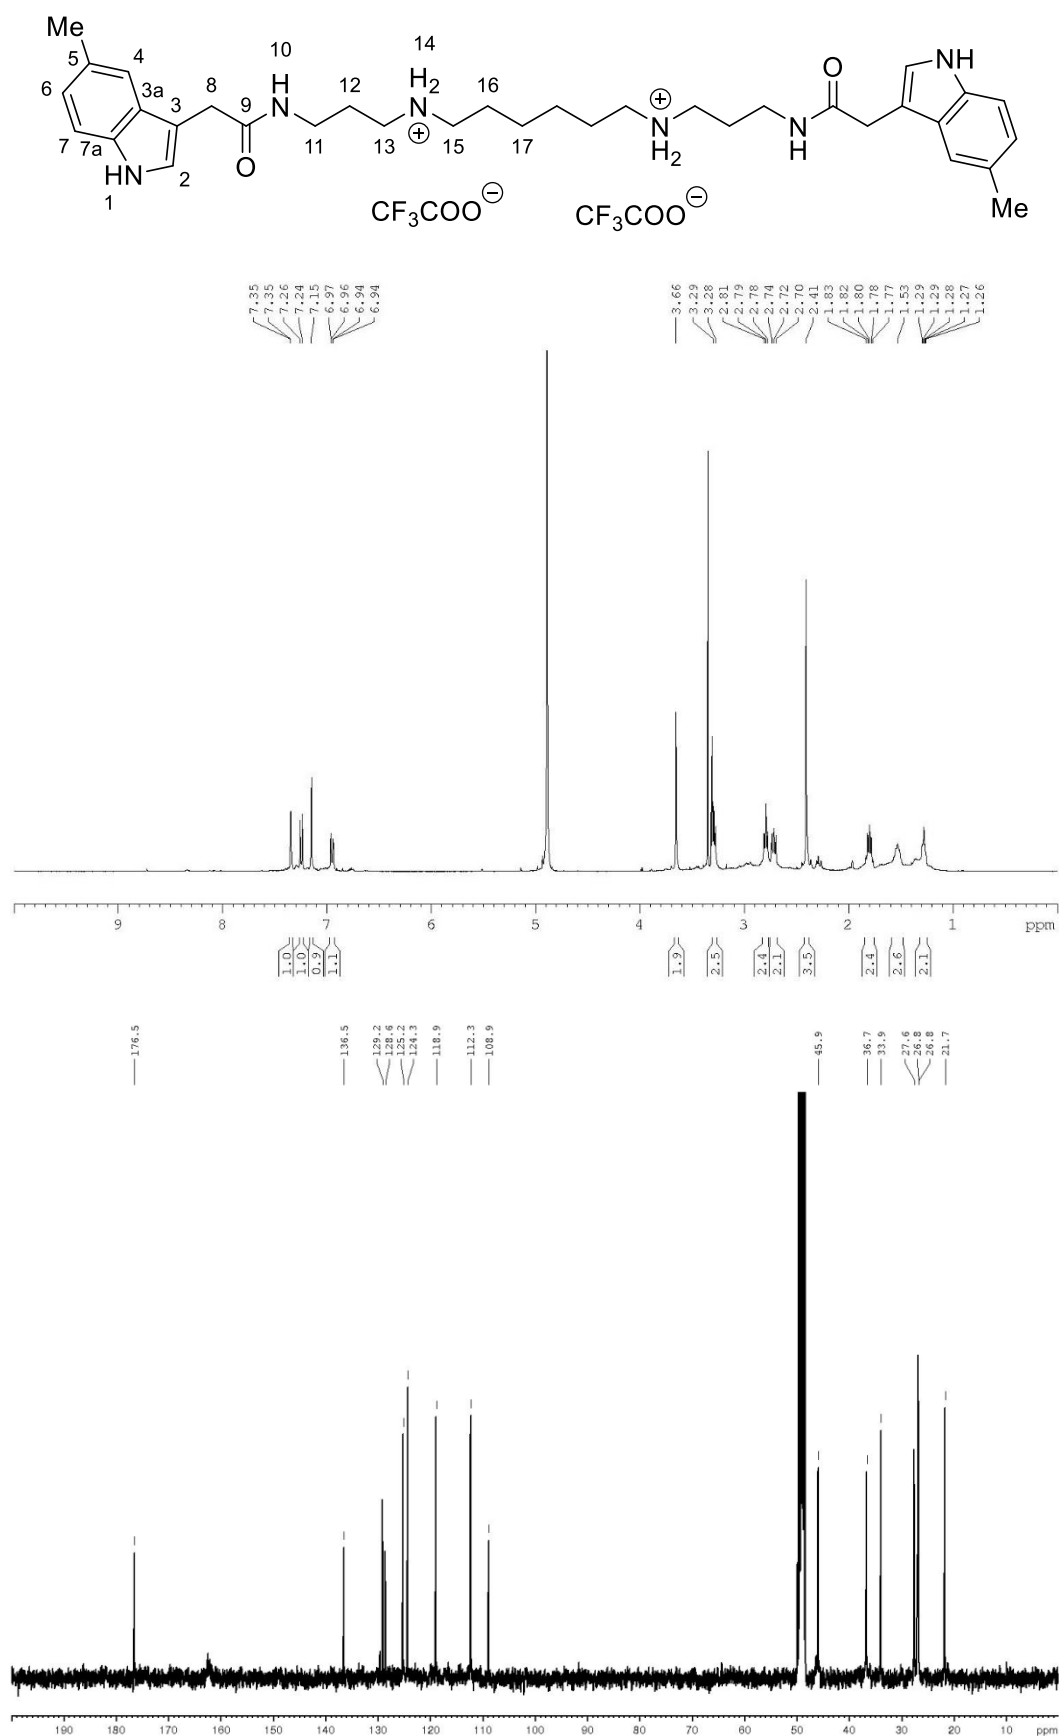

**Figure S17**  $^1\text{H}$  ( $\text{CD}_3\text{OD}$ , 400 MHz) and  $^{13}\text{C}$  ( $\text{CD}_3\text{OD}$ , 100 MHz) NMR spectra for **17b**

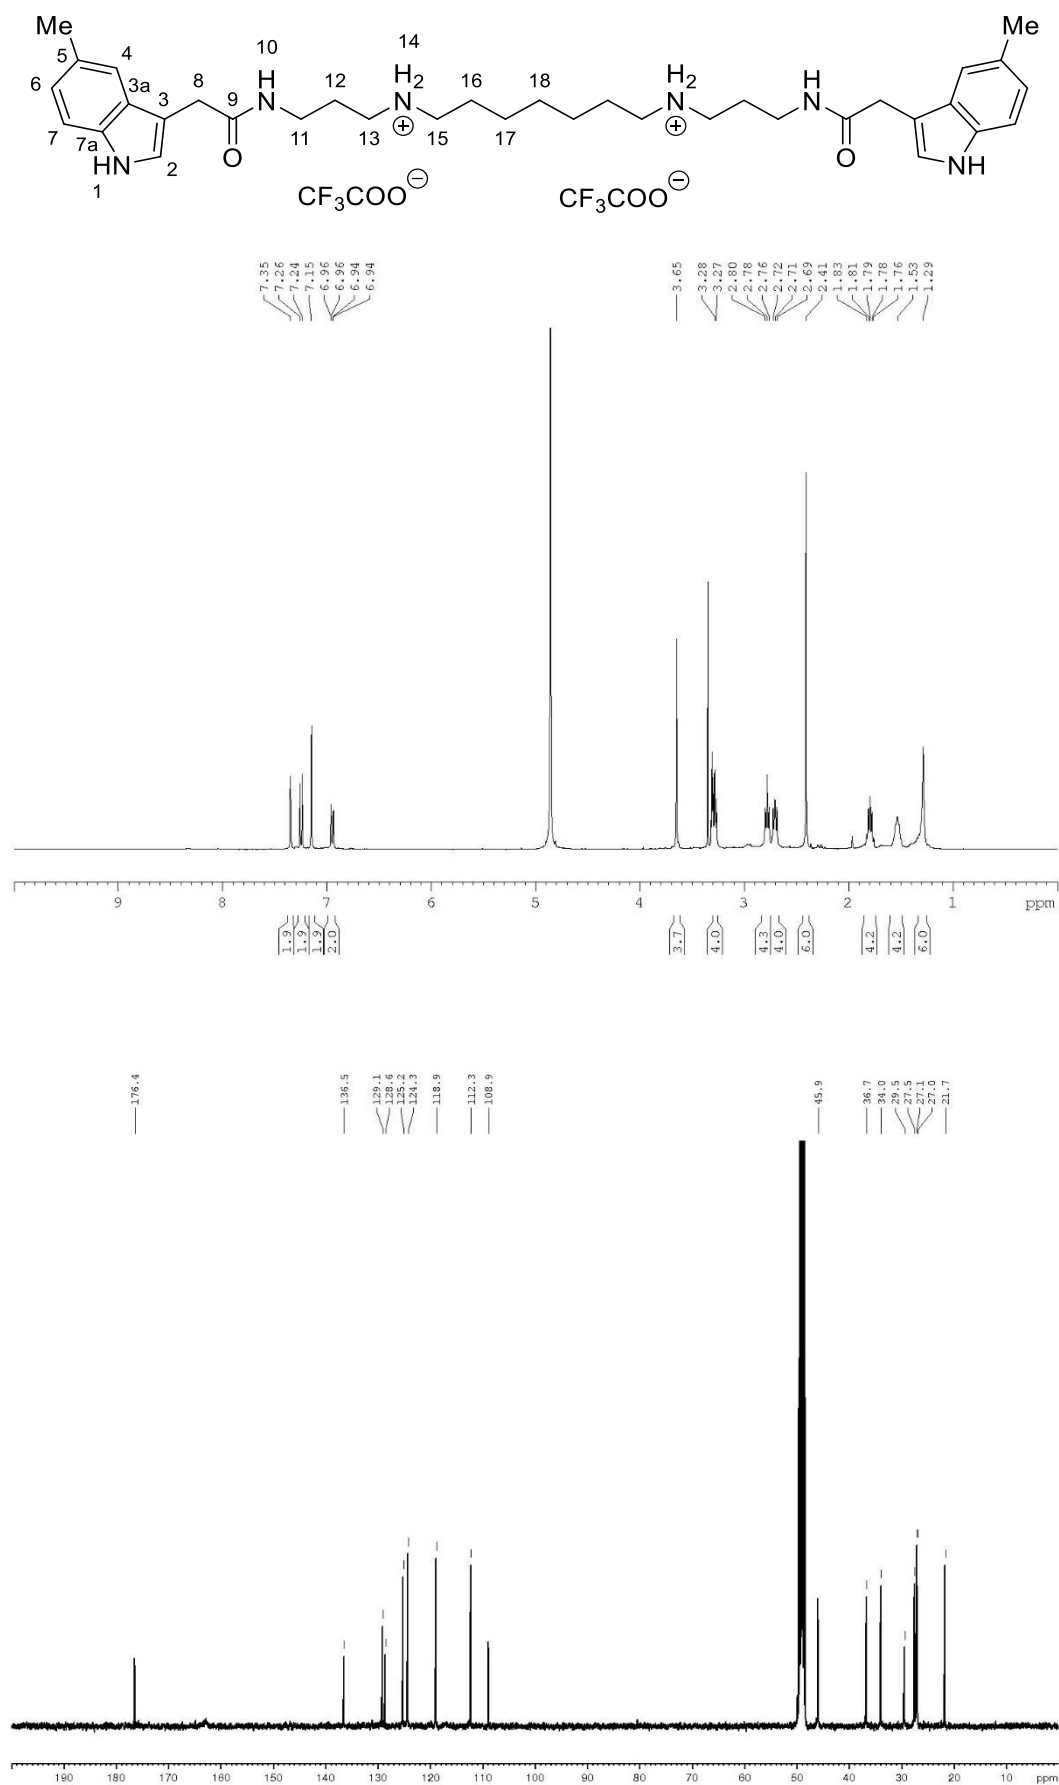

**Figure S18**  $^1\text{H}$  ( $\text{CD}_3\text{OD}$ , 400 MHz) and  $^{13}\text{C}$  ( $\text{CD}_3\text{OD}$ , 100 MHz) NMR spectra for **17c**

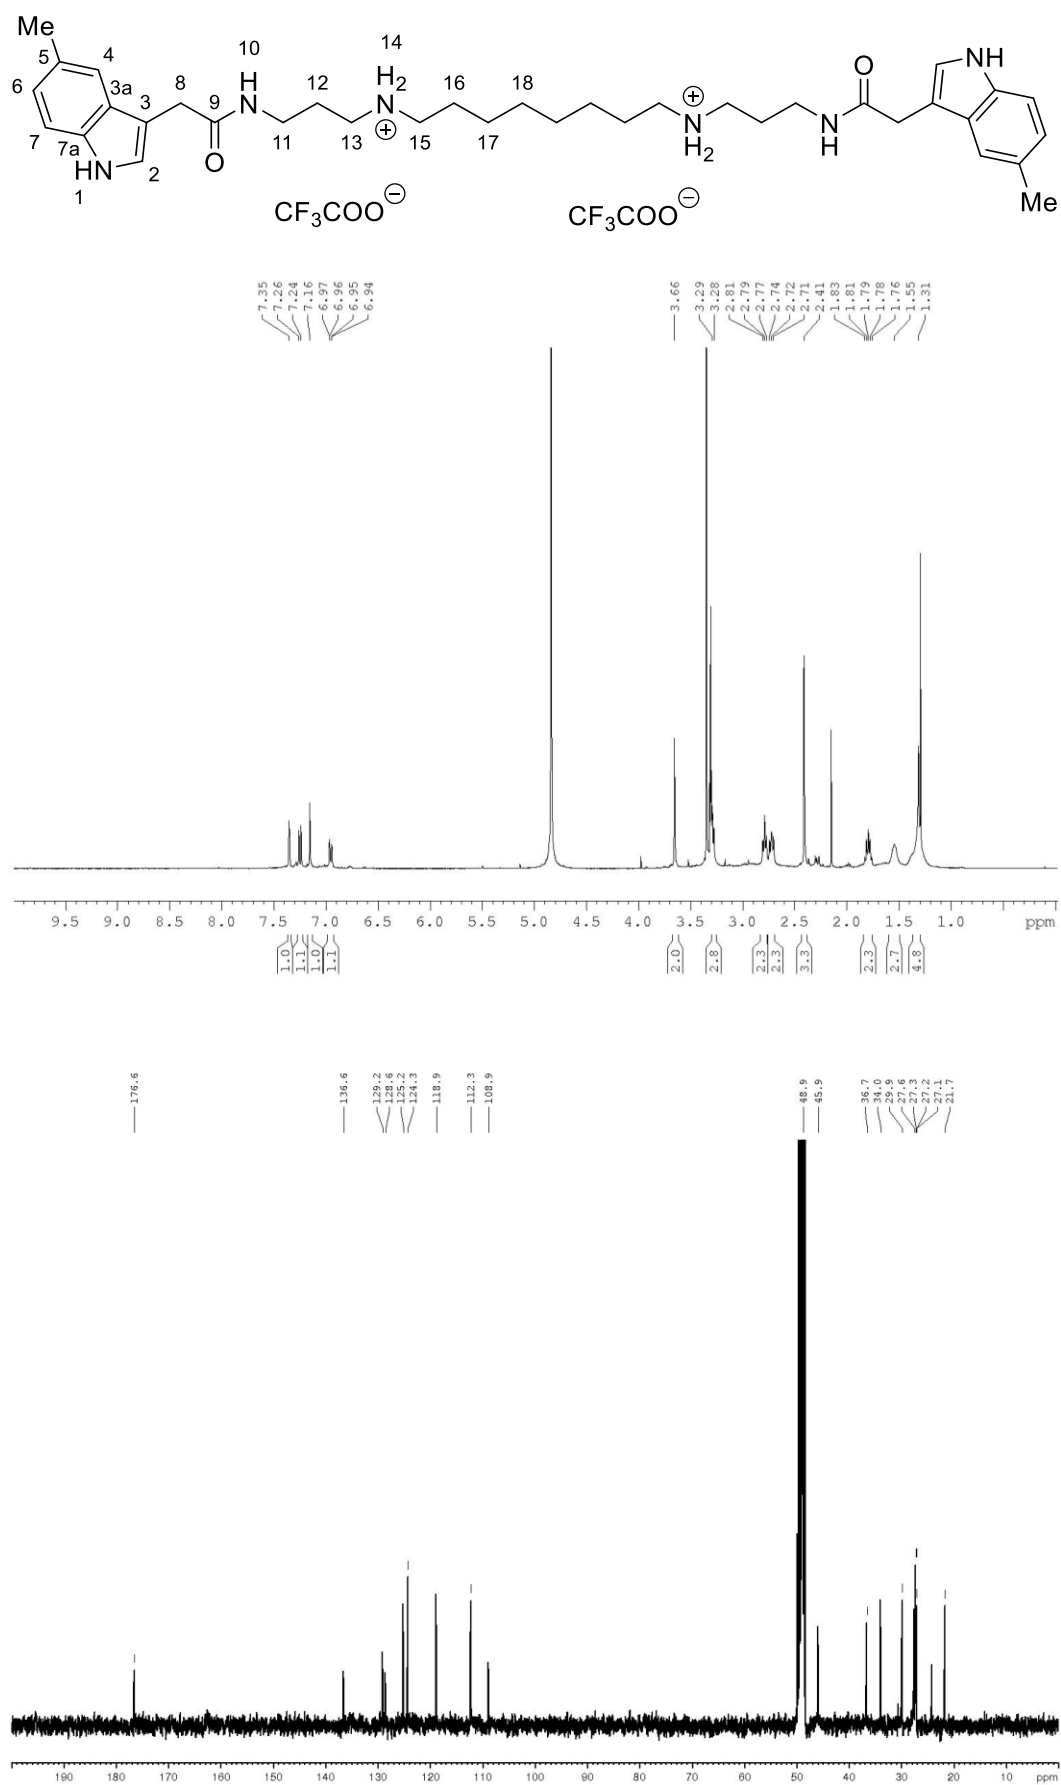

**Figure S19** <sup>1</sup>H (CD<sub>3</sub>OD, 400 MHz) and <sup>13</sup>C (CD<sub>3</sub>OD, 100 MHz) NMR spectra for **17d**

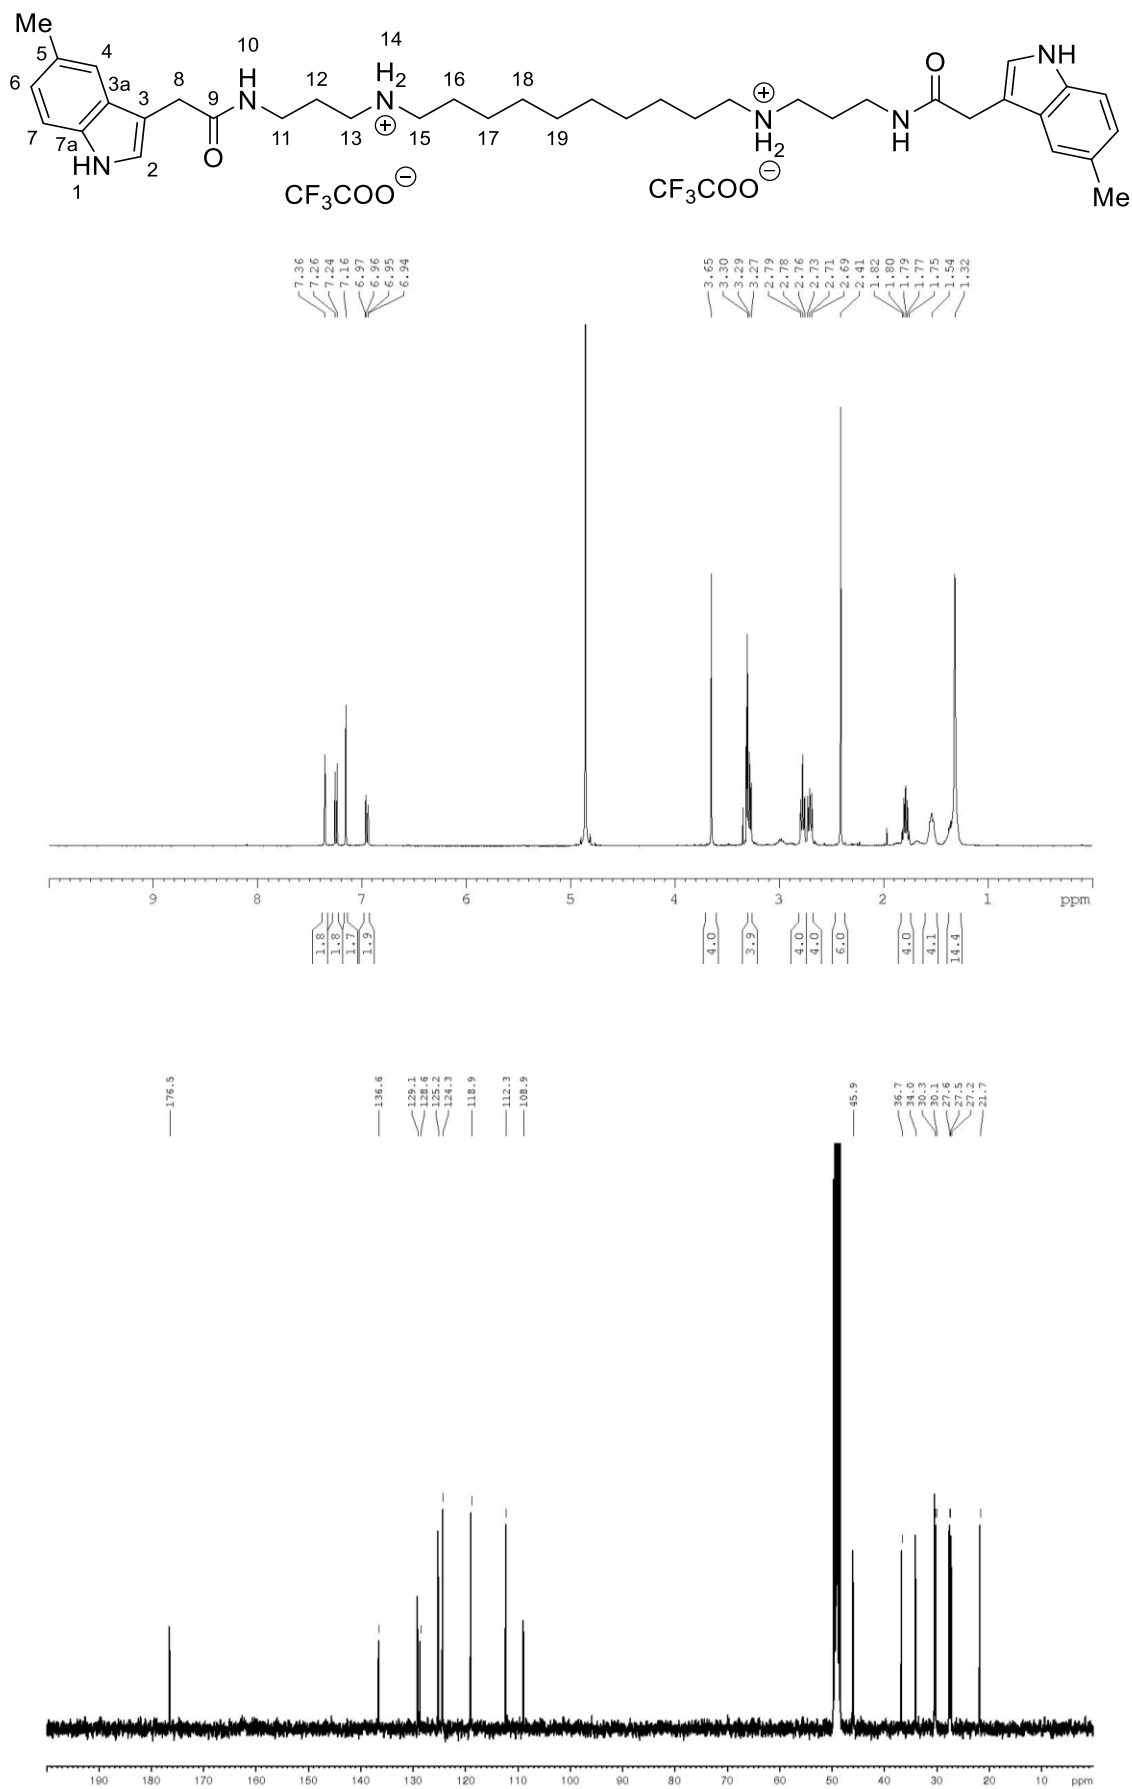

**Figure S20**  $^1\text{H}$  ( $\text{CD}_3\text{OD}$ , 400 MHz) and  $^{13}\text{C}$  ( $\text{CD}_3\text{OD}$ , 100 MHz) NMR spectra for **17e**

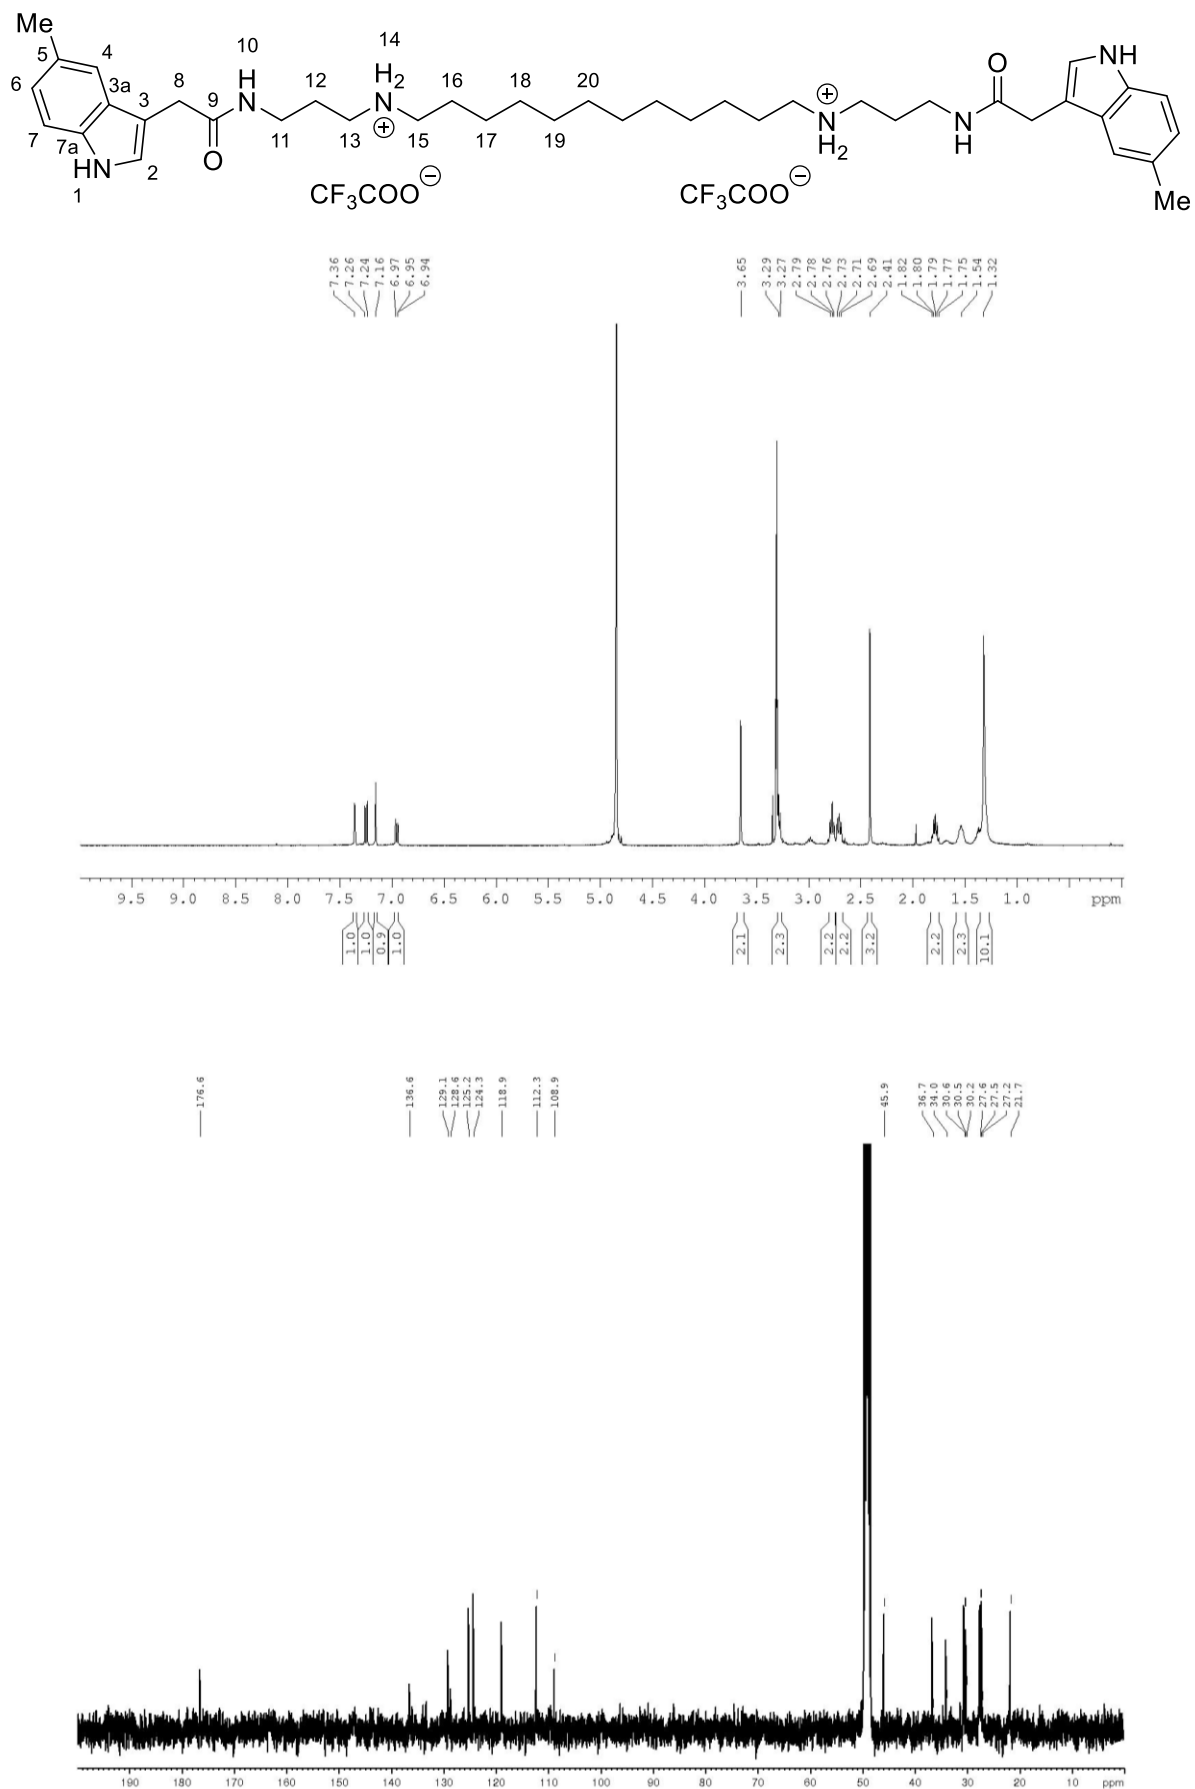

**Figure S21**  $^1\text{H}$  (CD<sub>3</sub>OD, 400 MHz) and  $^{13}\text{C}$  (CD<sub>3</sub>OD, 100 MHz) NMR spectra for **17f**

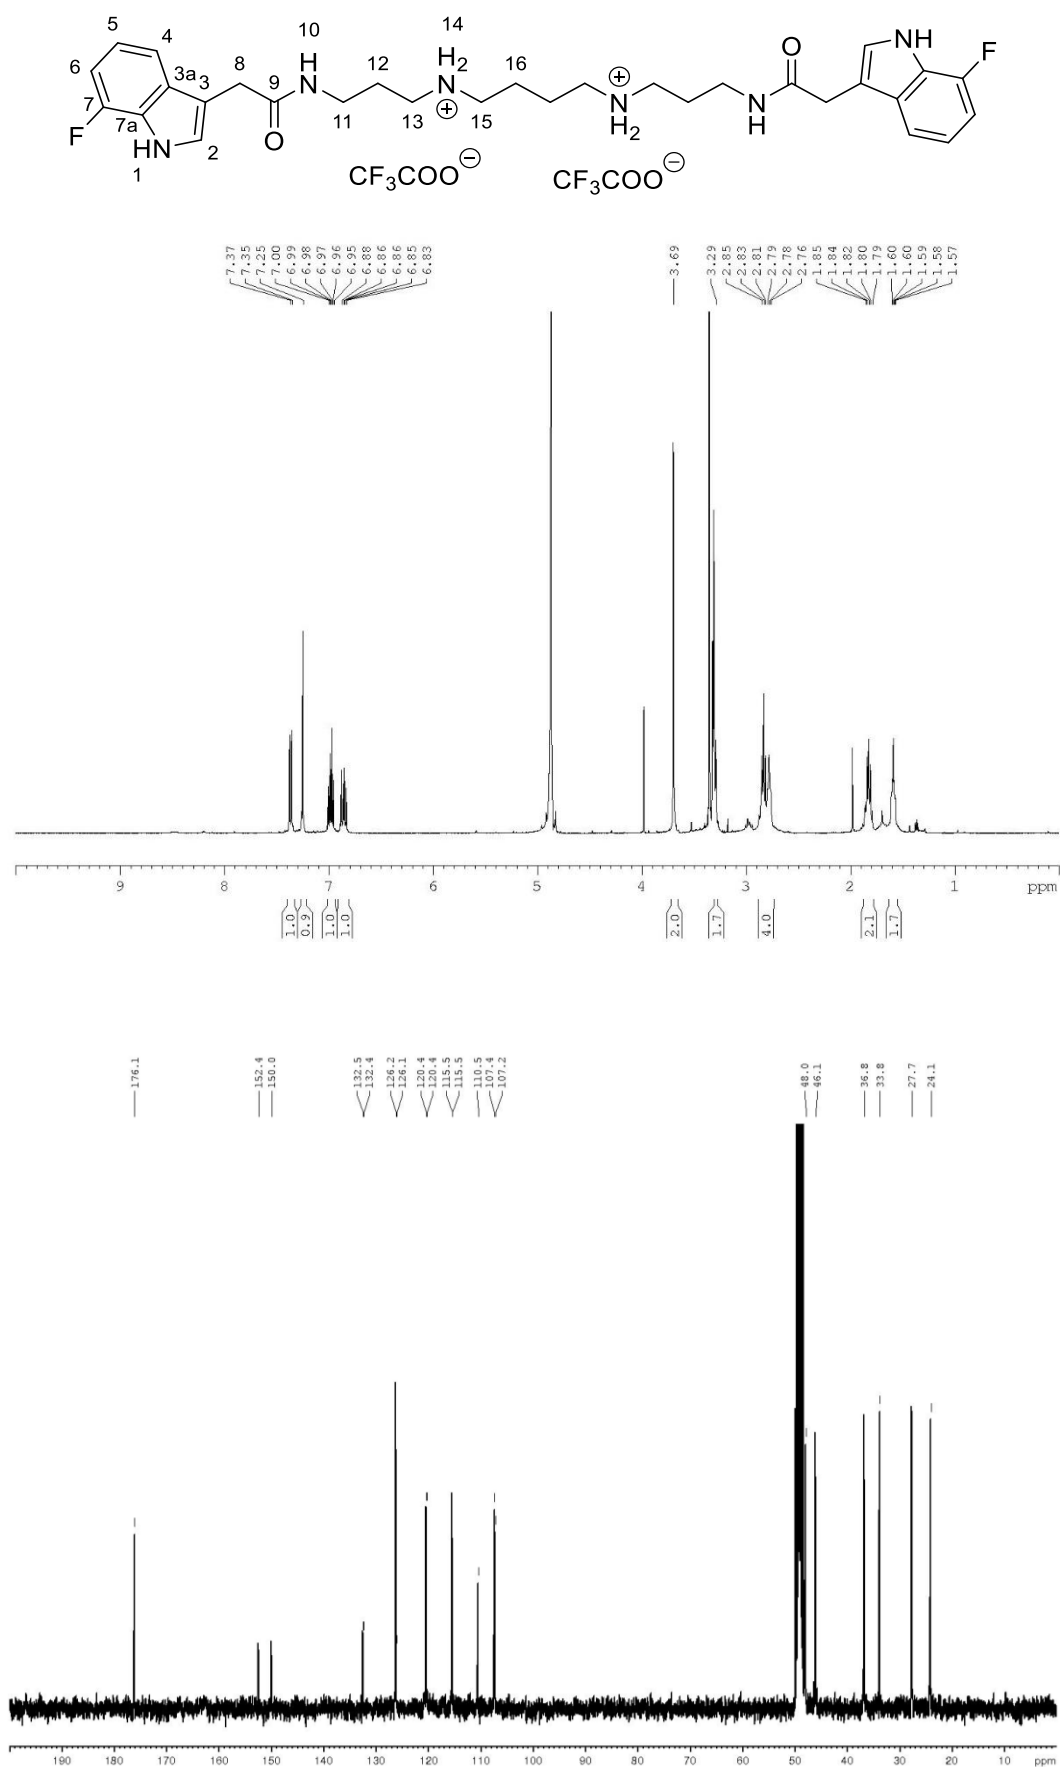

**Figure S22**  $^1\text{H}$  (CD<sub>3</sub>OD, 400 MHz) and  $^{13}\text{C}$  (CD<sub>3</sub>OD, 100 MHz) NMR spectra for **18a**



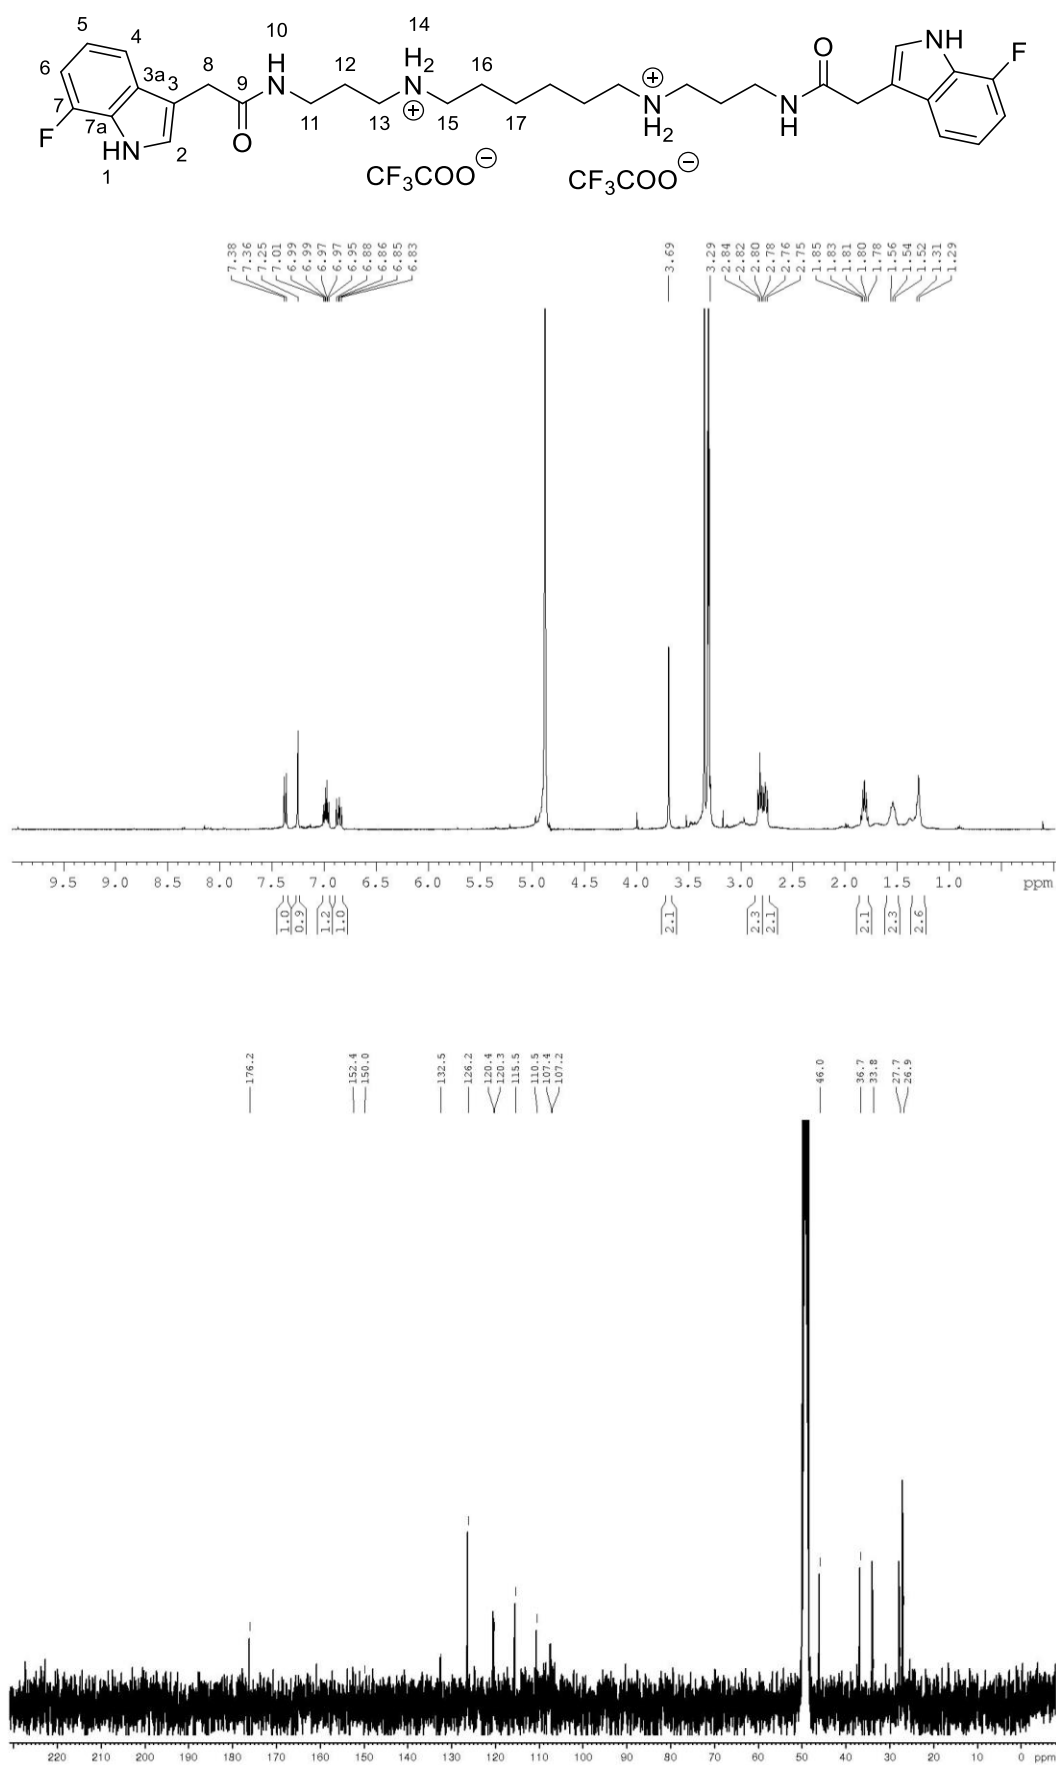

**Figure S23**  $^1\text{H}$  (CD<sub>3</sub>OD, 400 MHz) and  $^{13}\text{C}$  (CD<sub>3</sub>OD, 100 MHz) NMR spectra for **18b**



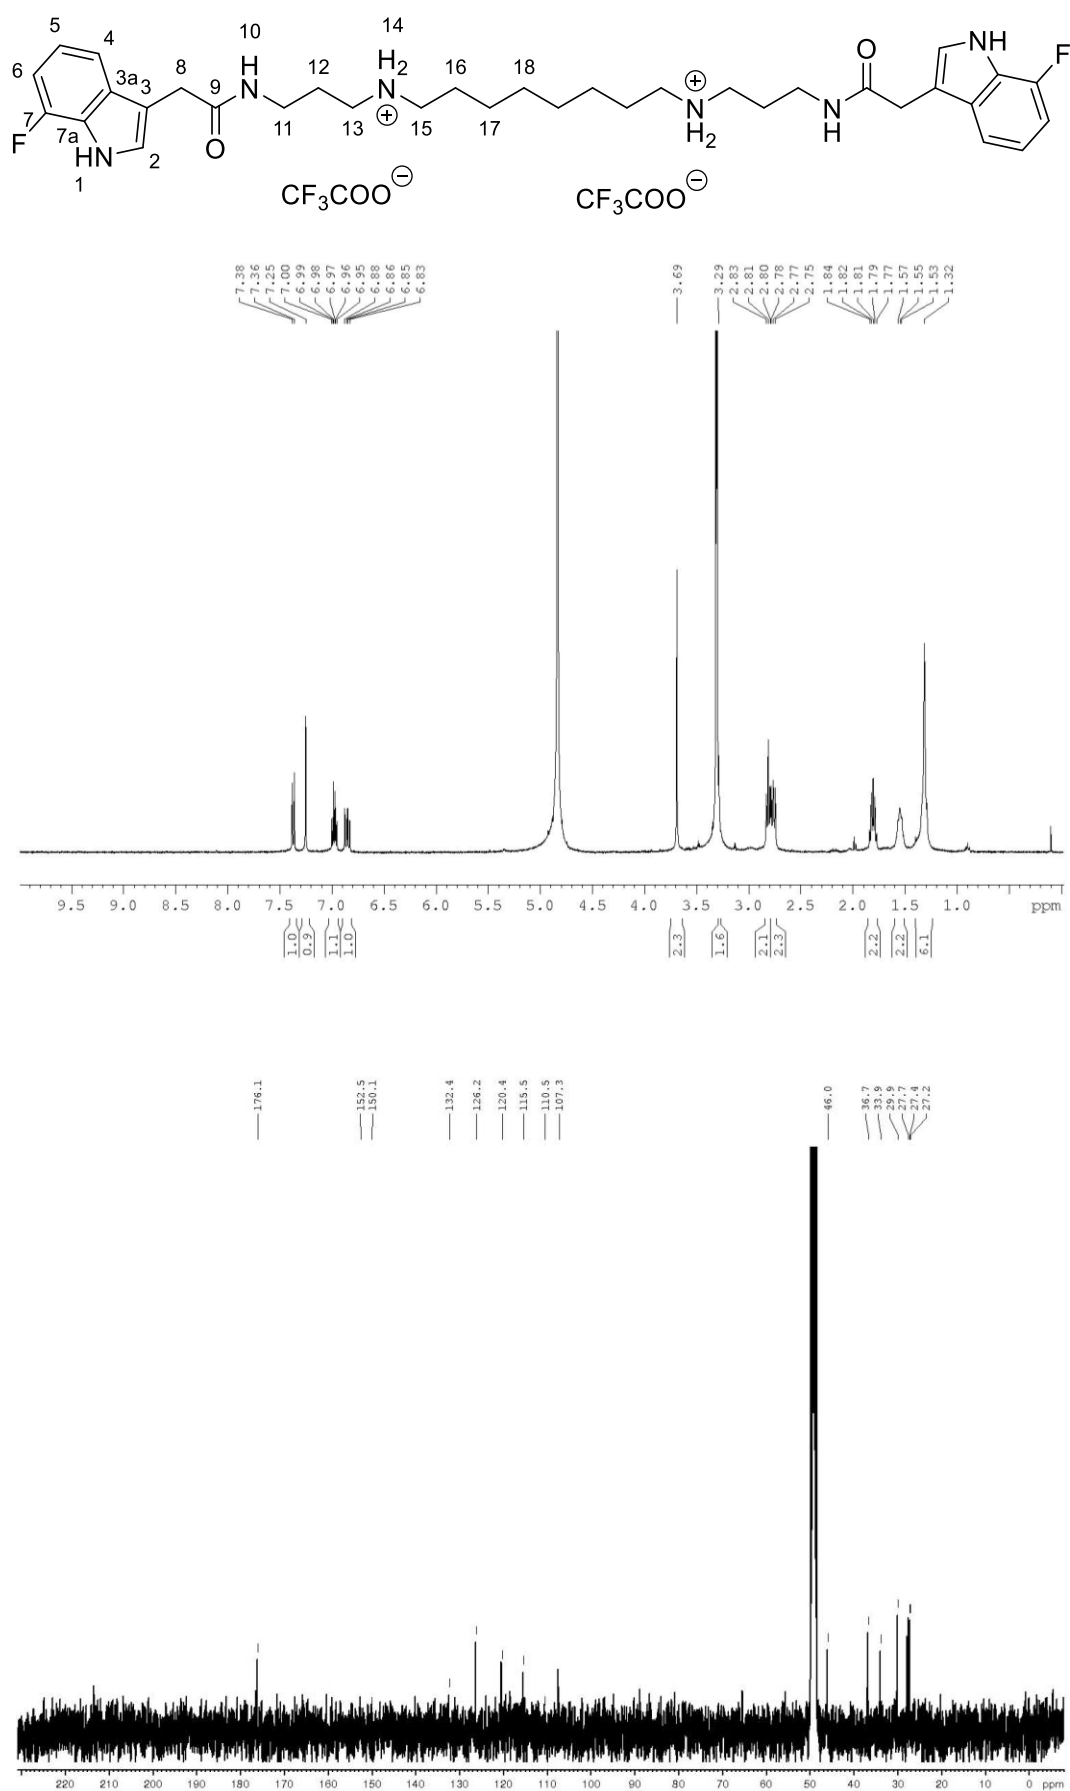

**Figure S25** <sup>1</sup>H (CD<sub>3</sub>OD, 400 MHz) and <sup>13</sup>C (CD<sub>3</sub>OD, 100 MHz) NMR spectra for **18d**

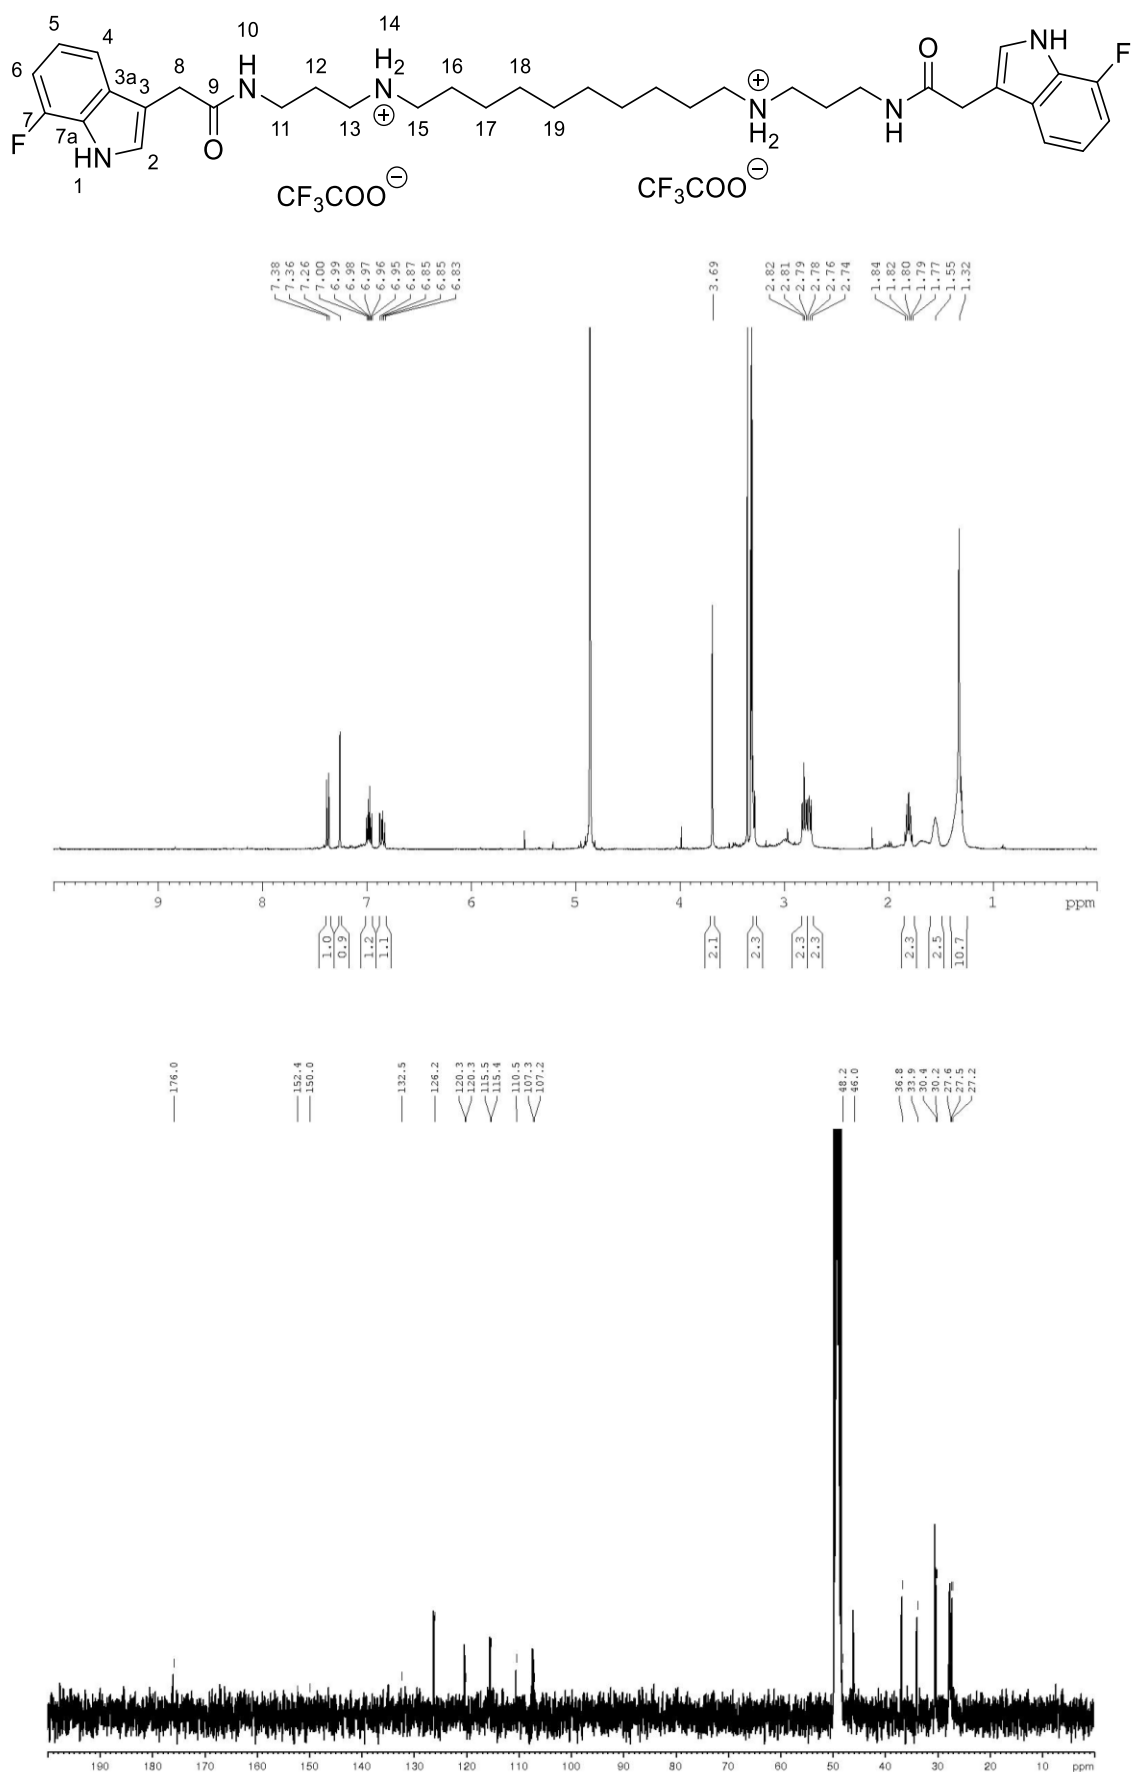

**Figure S26** <sup>1</sup>H (CD<sub>3</sub>OD, 400 MHz) and <sup>13</sup>C (CD<sub>3</sub>OD, 100 MHz) NMR spectra for **18e**

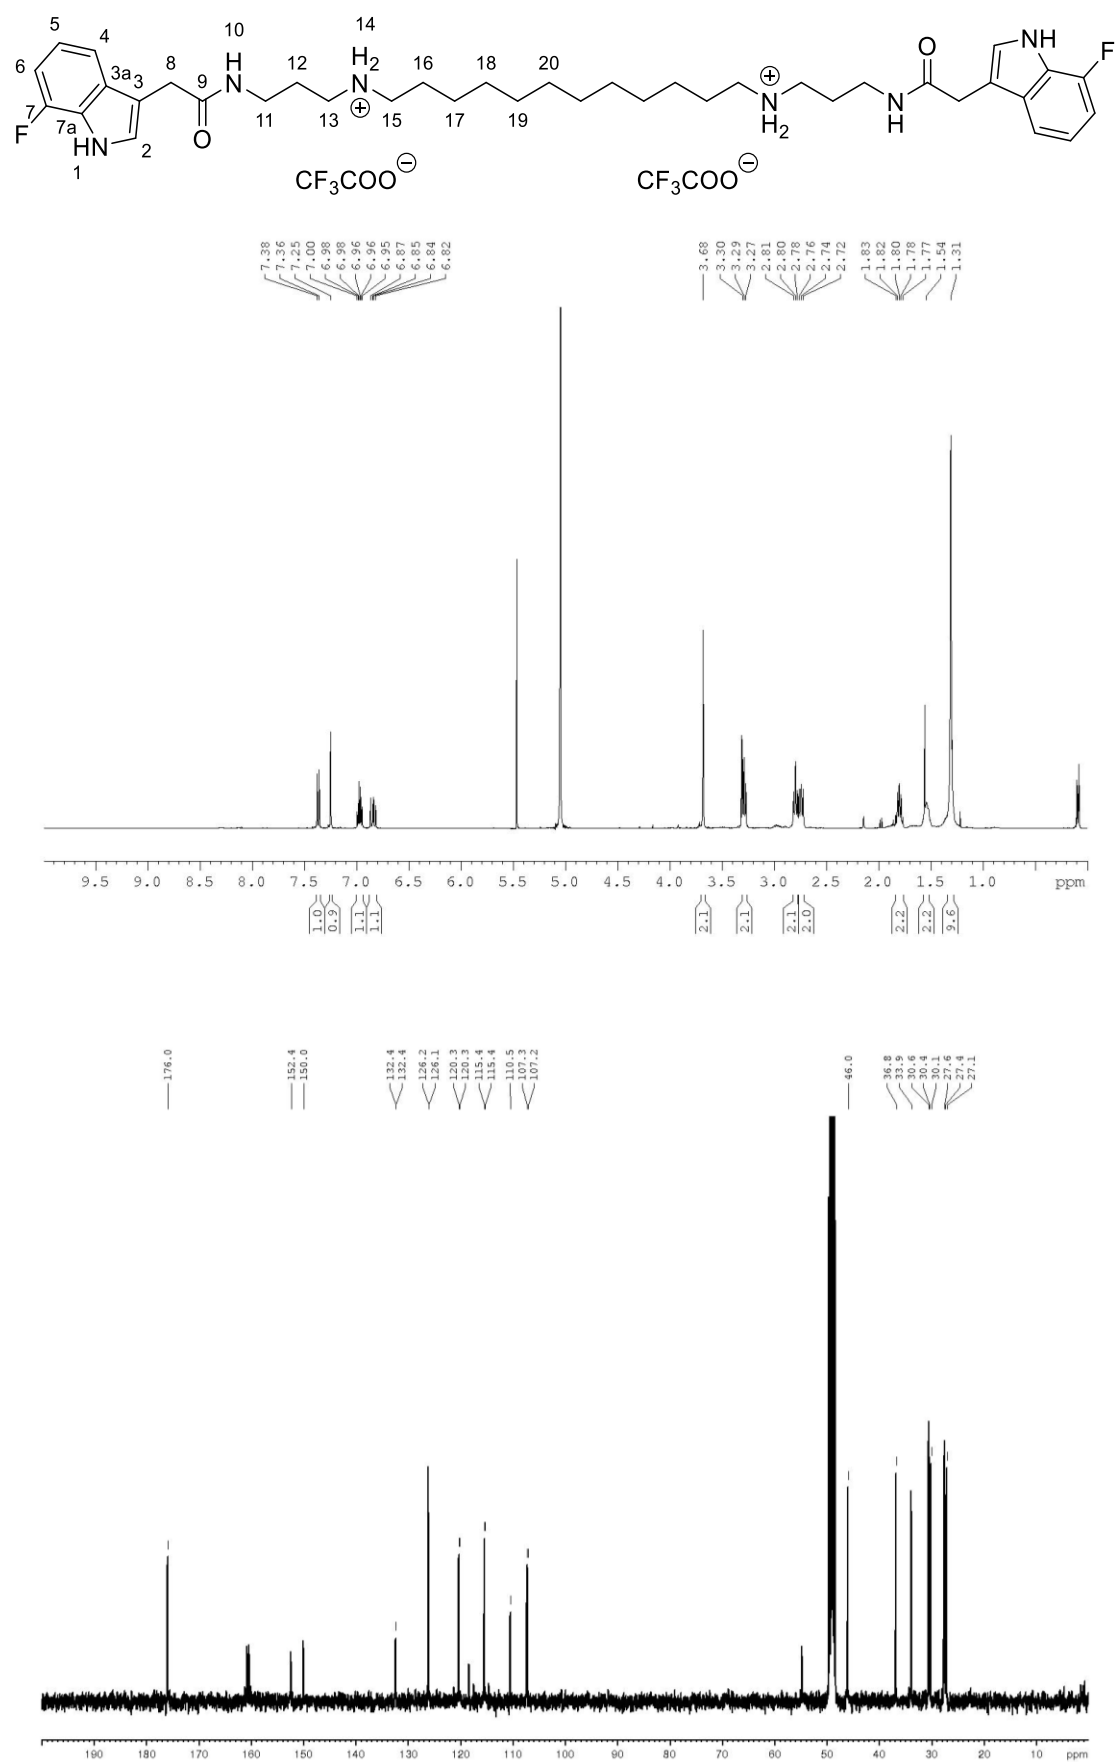

**Figure S27** <sup>1</sup>H (CD<sub>3</sub>OD, 400 MHz) and <sup>13</sup>C (CD<sub>3</sub>OD, 100 MHz) NMR spectra for **18f**

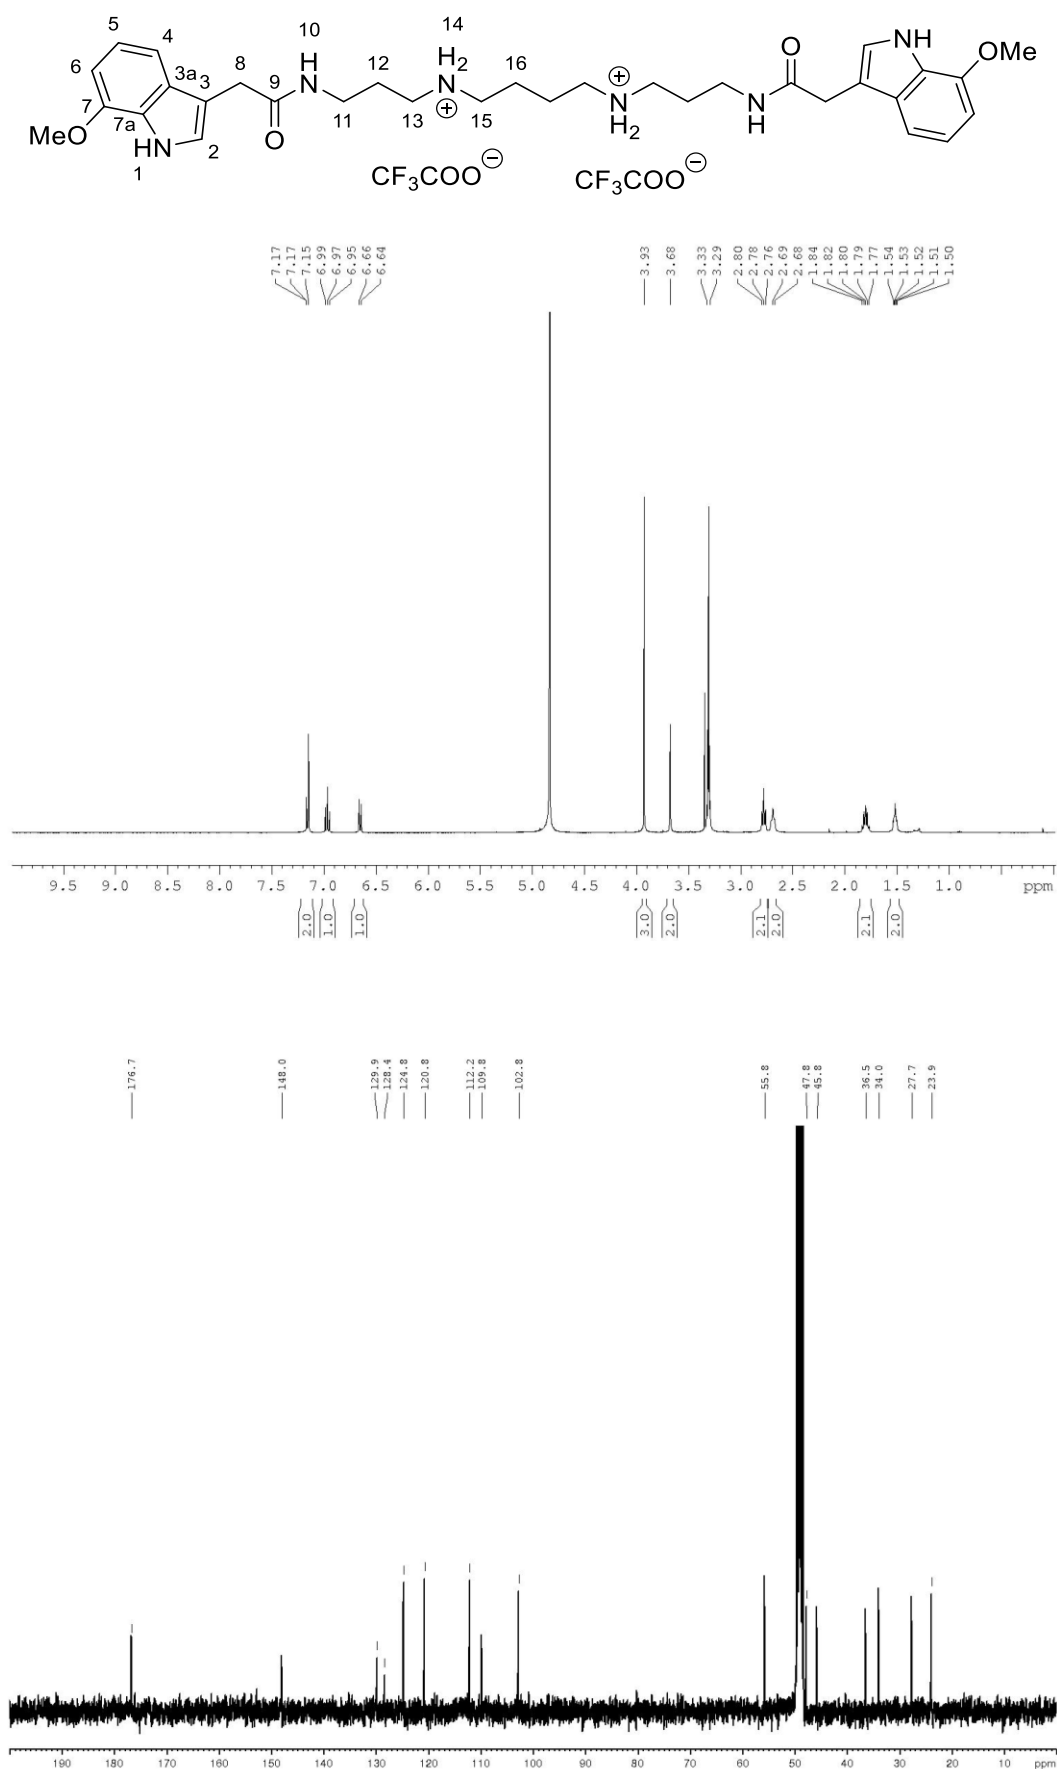

**Figure S28** <sup>1</sup>H (CD<sub>3</sub>OD, 400 MHz) and <sup>13</sup>C (CD<sub>3</sub>OD, 100 MHz) NMR spectra for **19a**

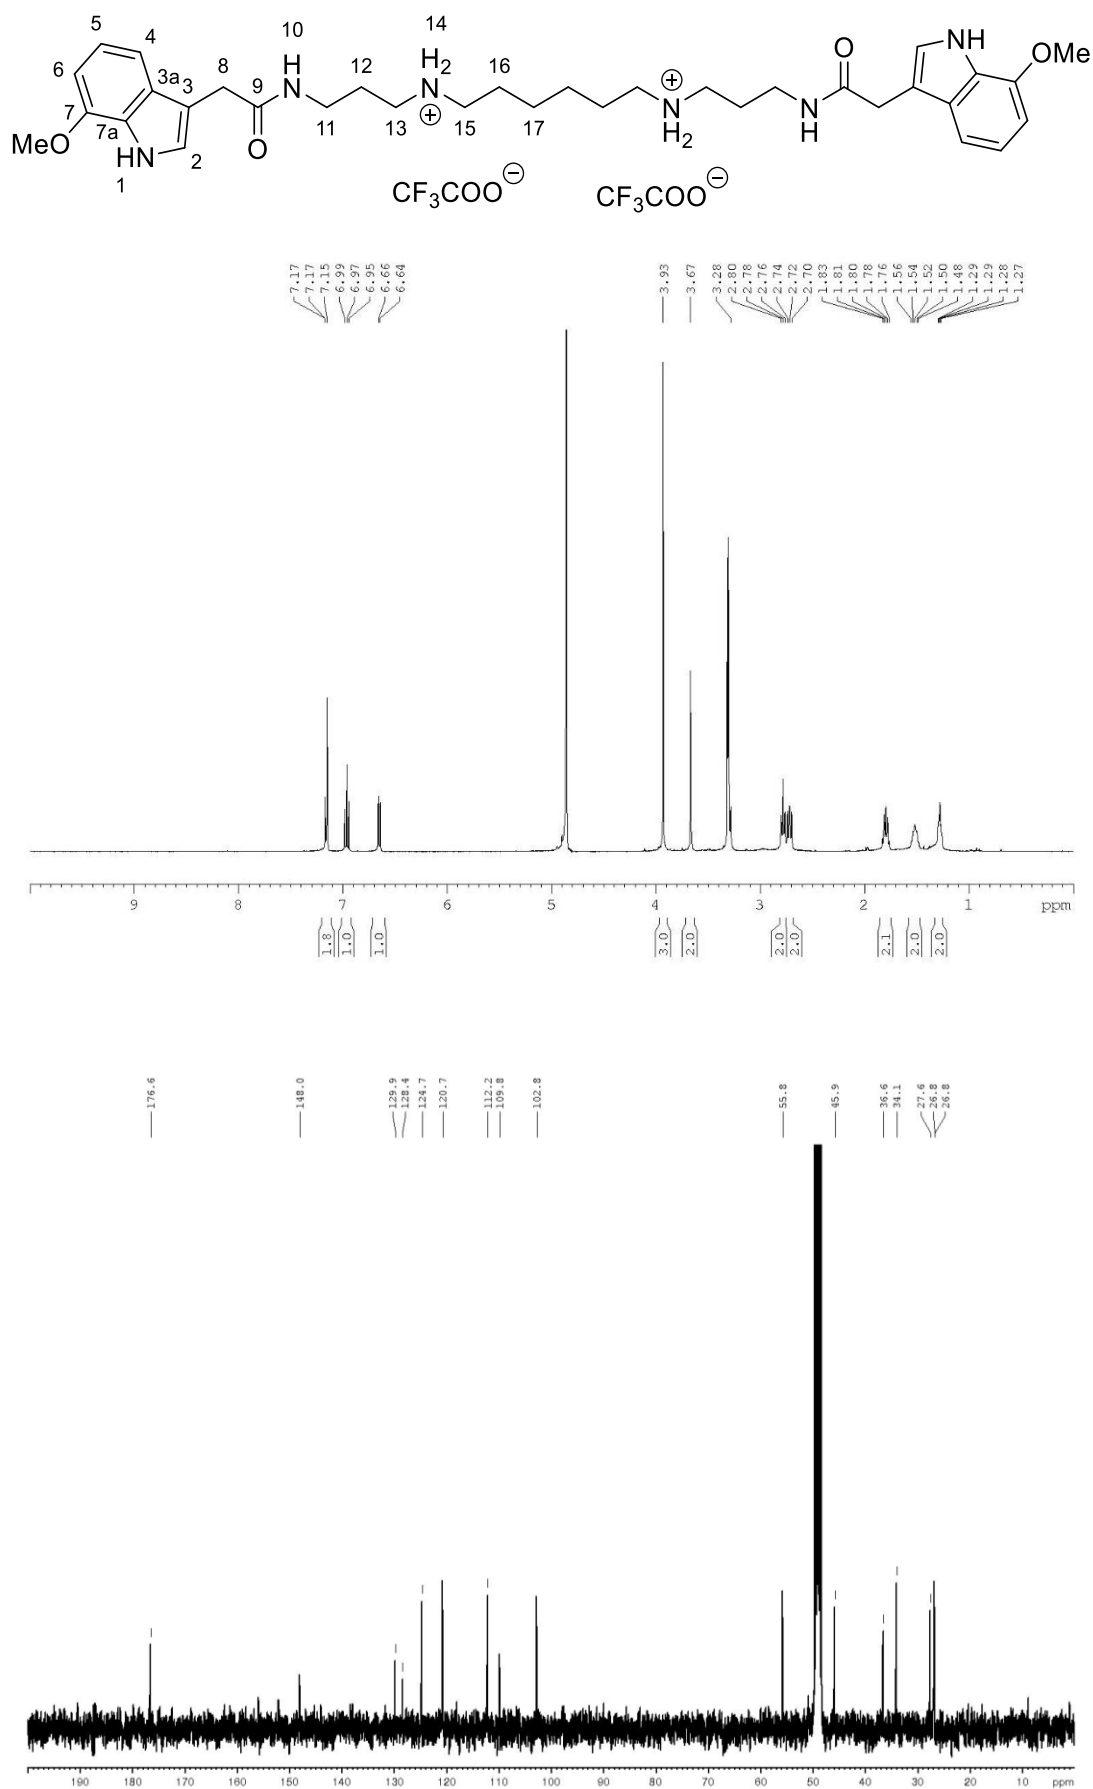

**Figure S29** <sup>1</sup>H (CD<sub>3</sub>OD, 400 MHz) and <sup>13</sup>C (CD<sub>3</sub>OD, 100 MHz) NMR spectra for **19b**

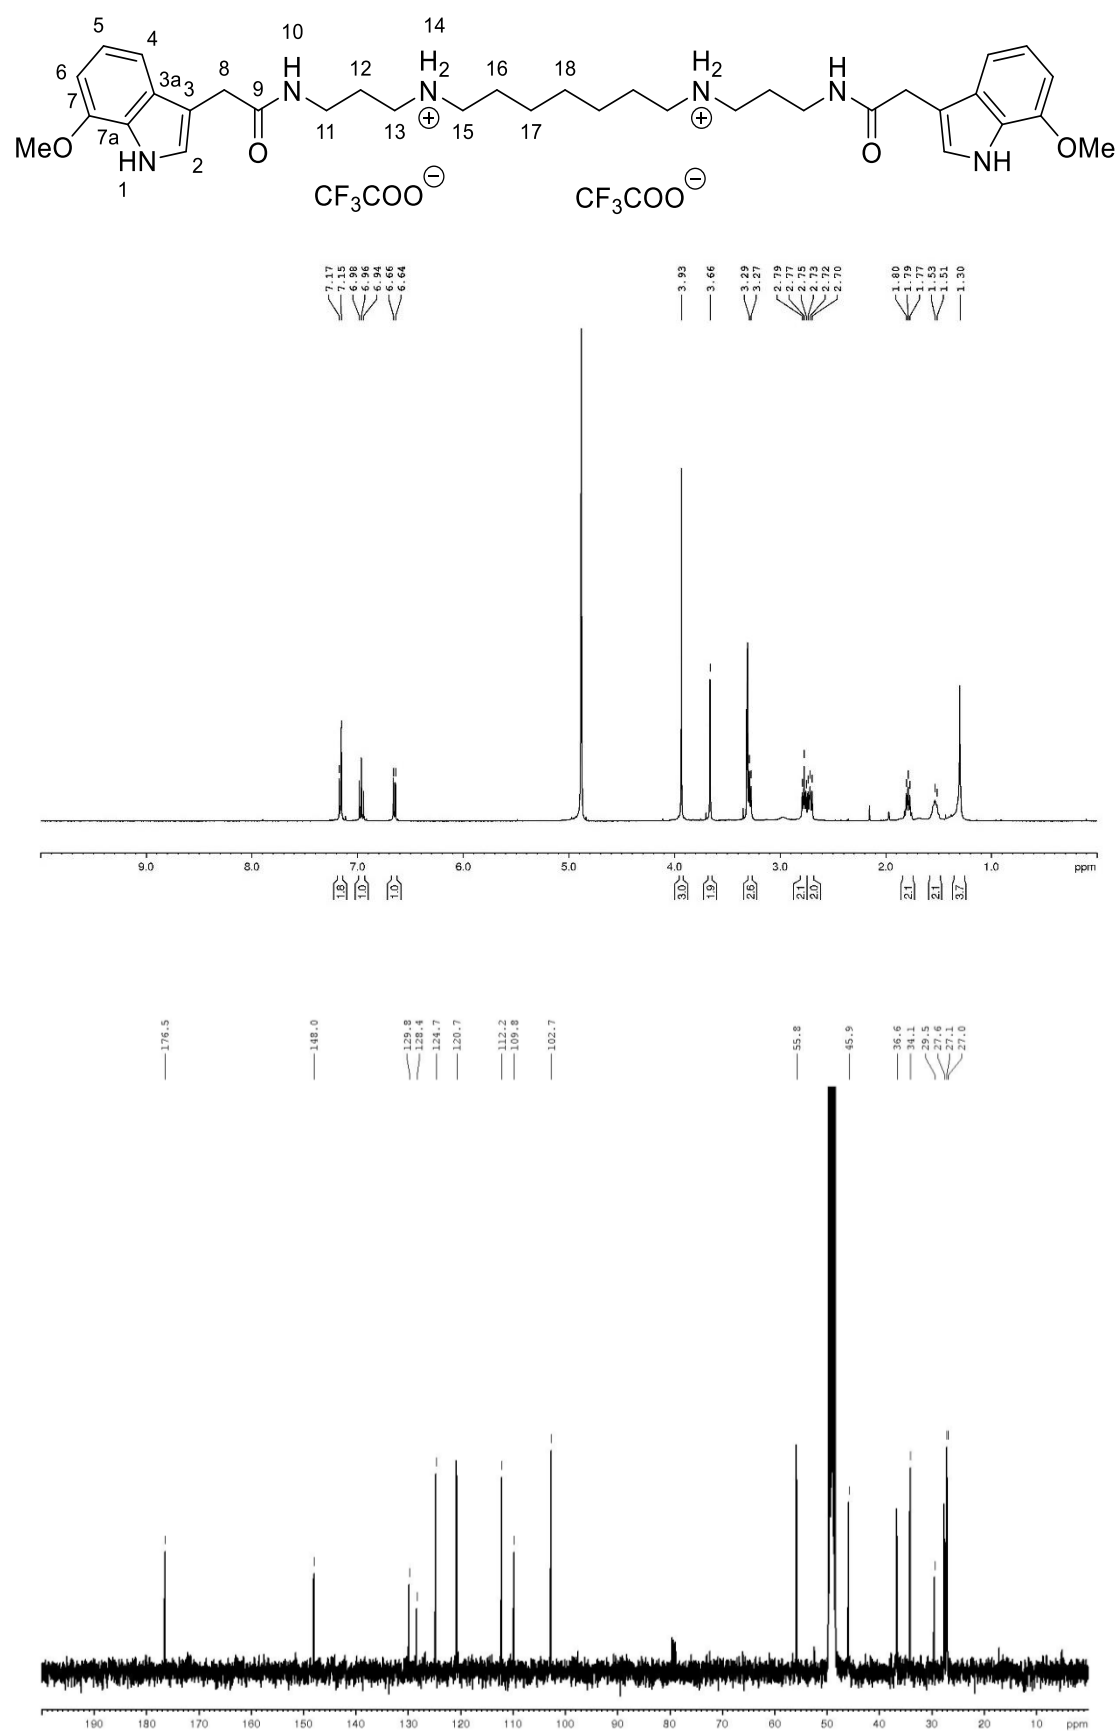

**Figure S30** <sup>1</sup>H (CD<sub>3</sub>OD, 400 MHz) and <sup>13</sup>C (CD<sub>3</sub>OD, 100 MHz) NMR spectra for **19c**



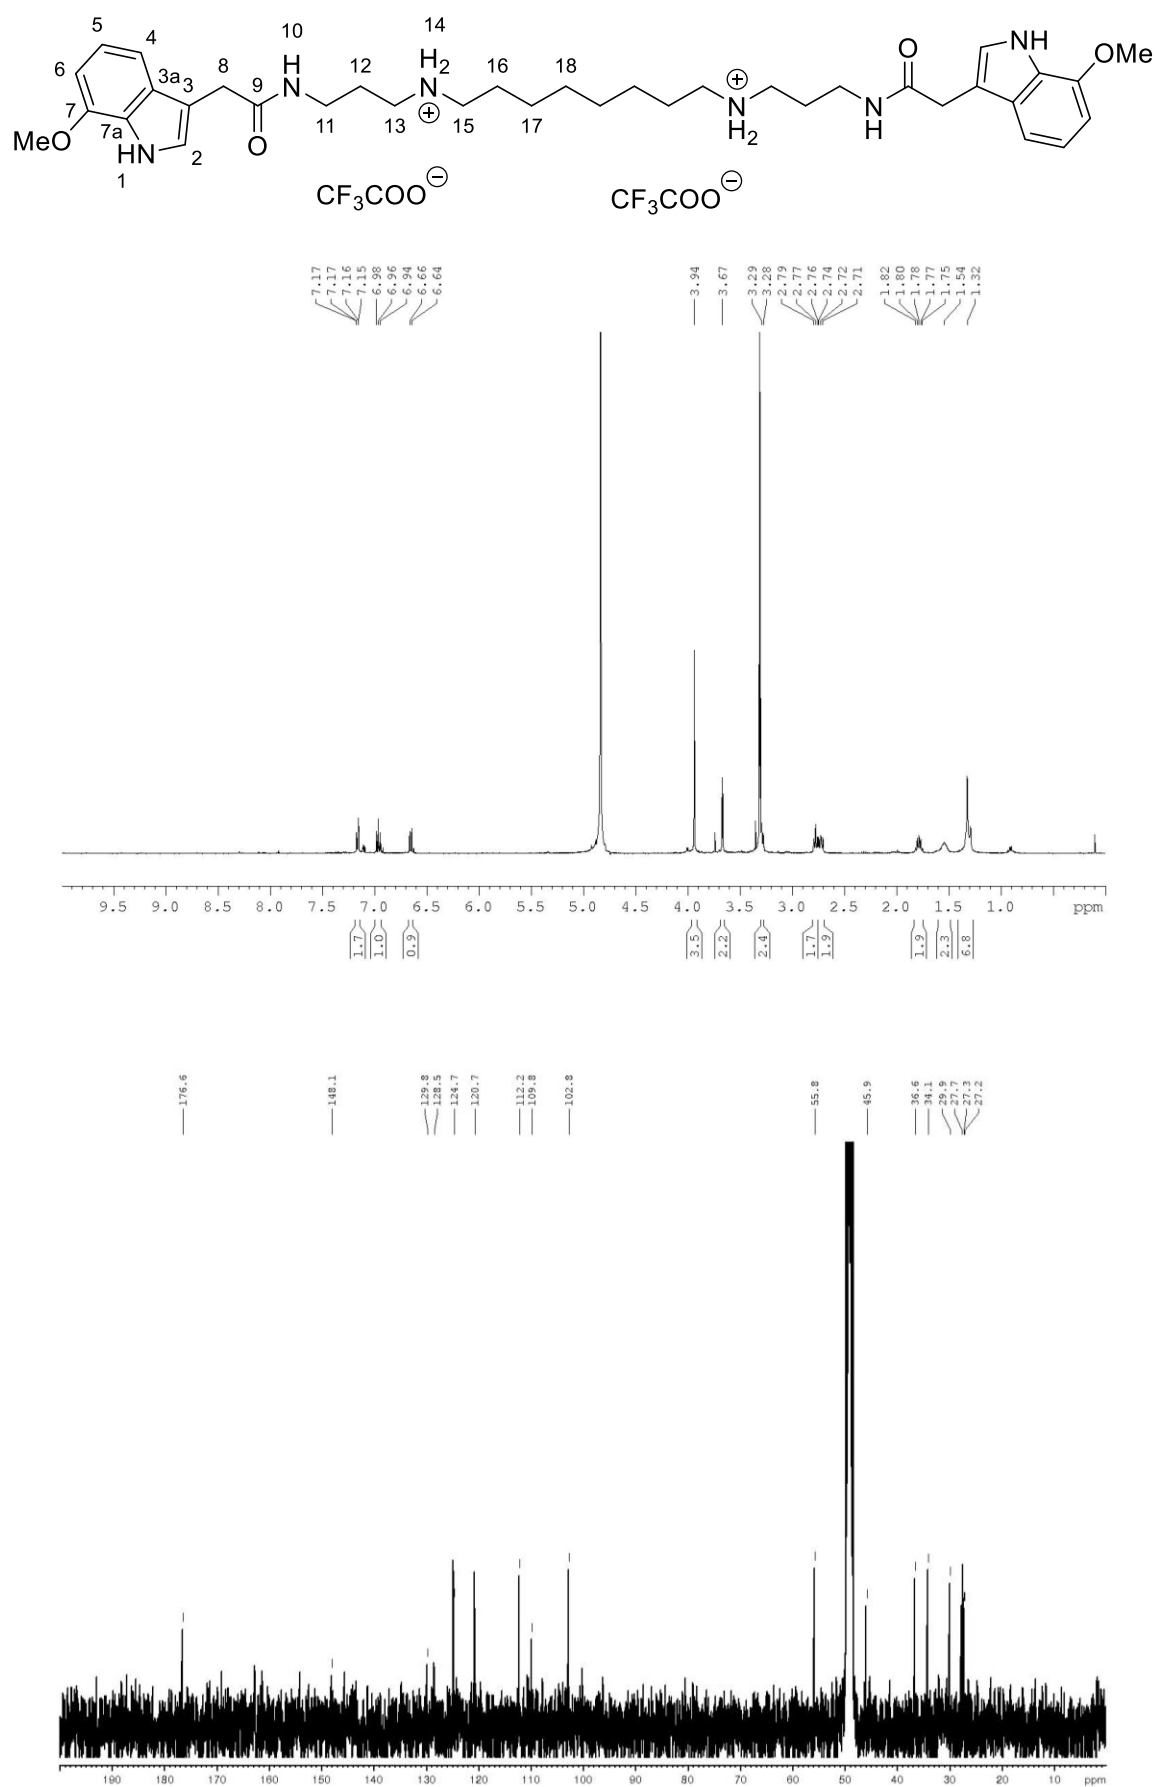

**Figure S31**  $^1\text{H}$  ( $\text{CD}_3\text{OD}$ , 400 MHz) and  $^{13}\text{C}$  ( $\text{CD}_3\text{OD}$ , 100 MHz) NMR spectra for **19d**

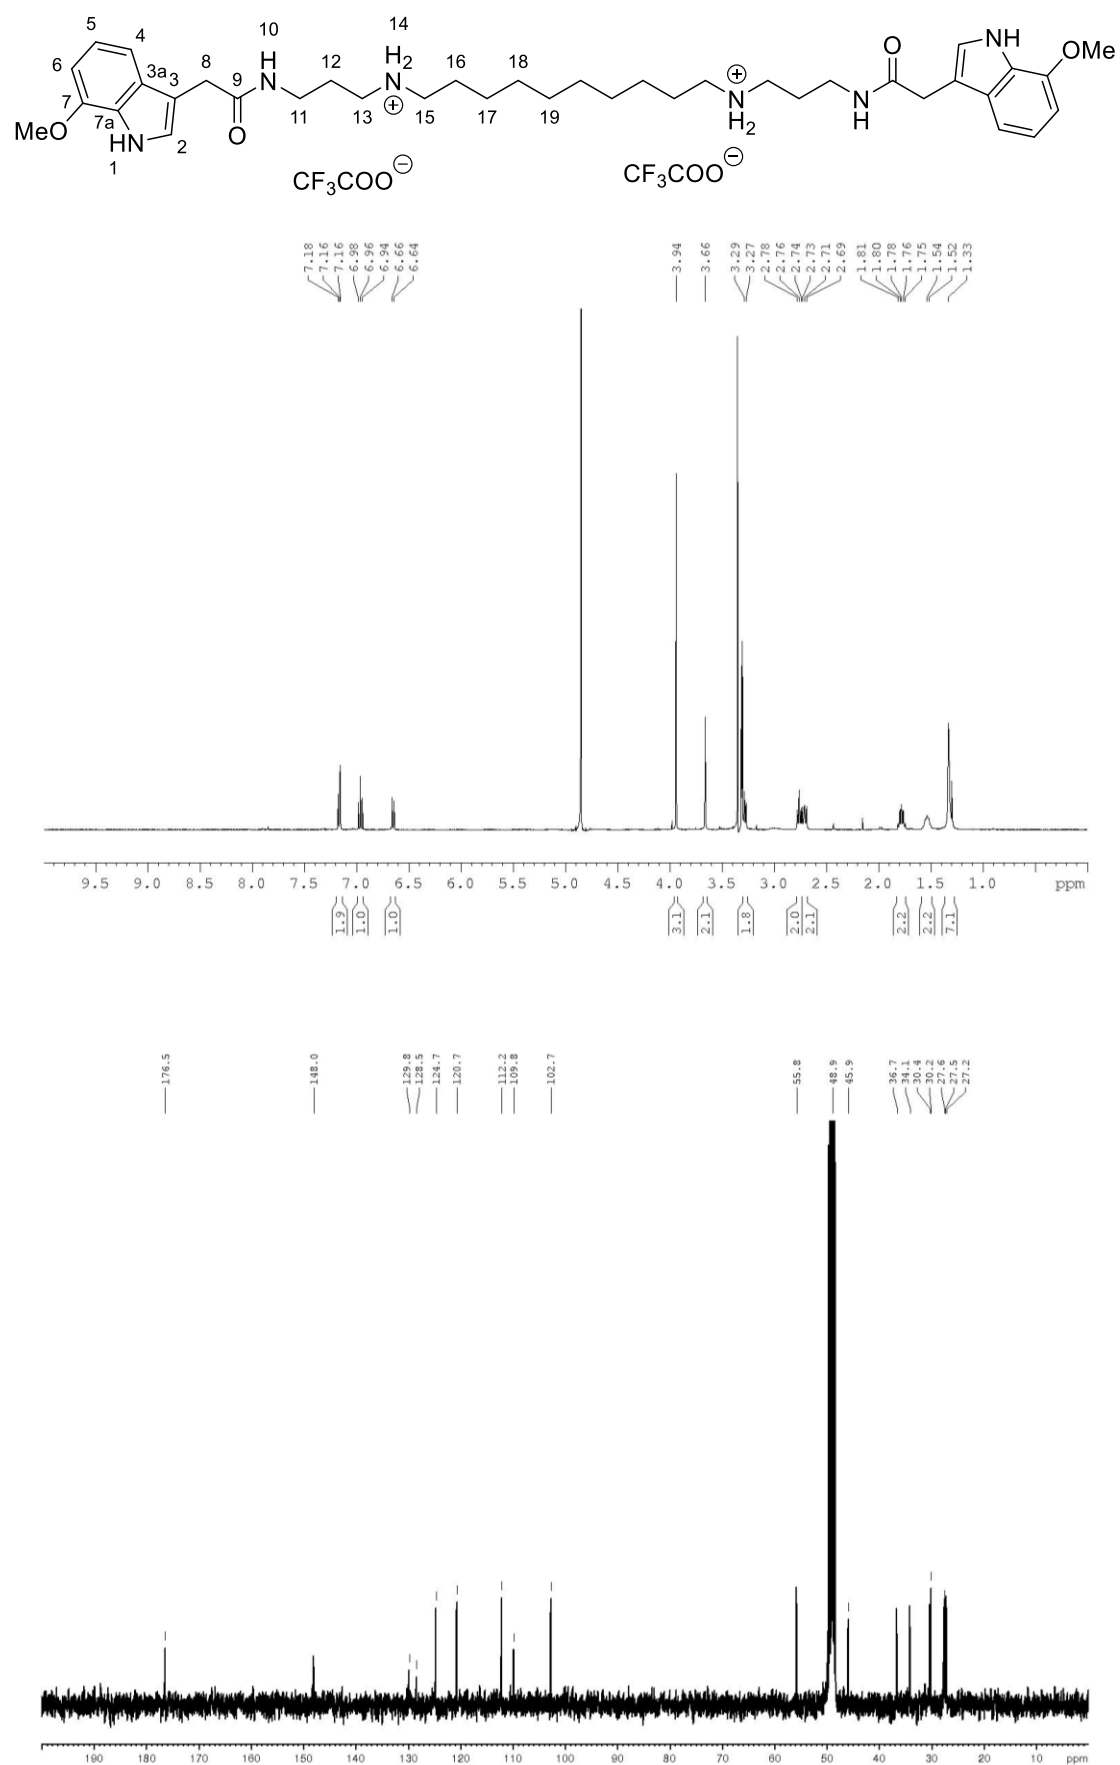

**Figure S32** <sup>1</sup>H (CD<sub>3</sub>OD, 400 MHz) and <sup>13</sup>C (CD<sub>3</sub>OD, 100 MHz) NMR spectra for **19e**

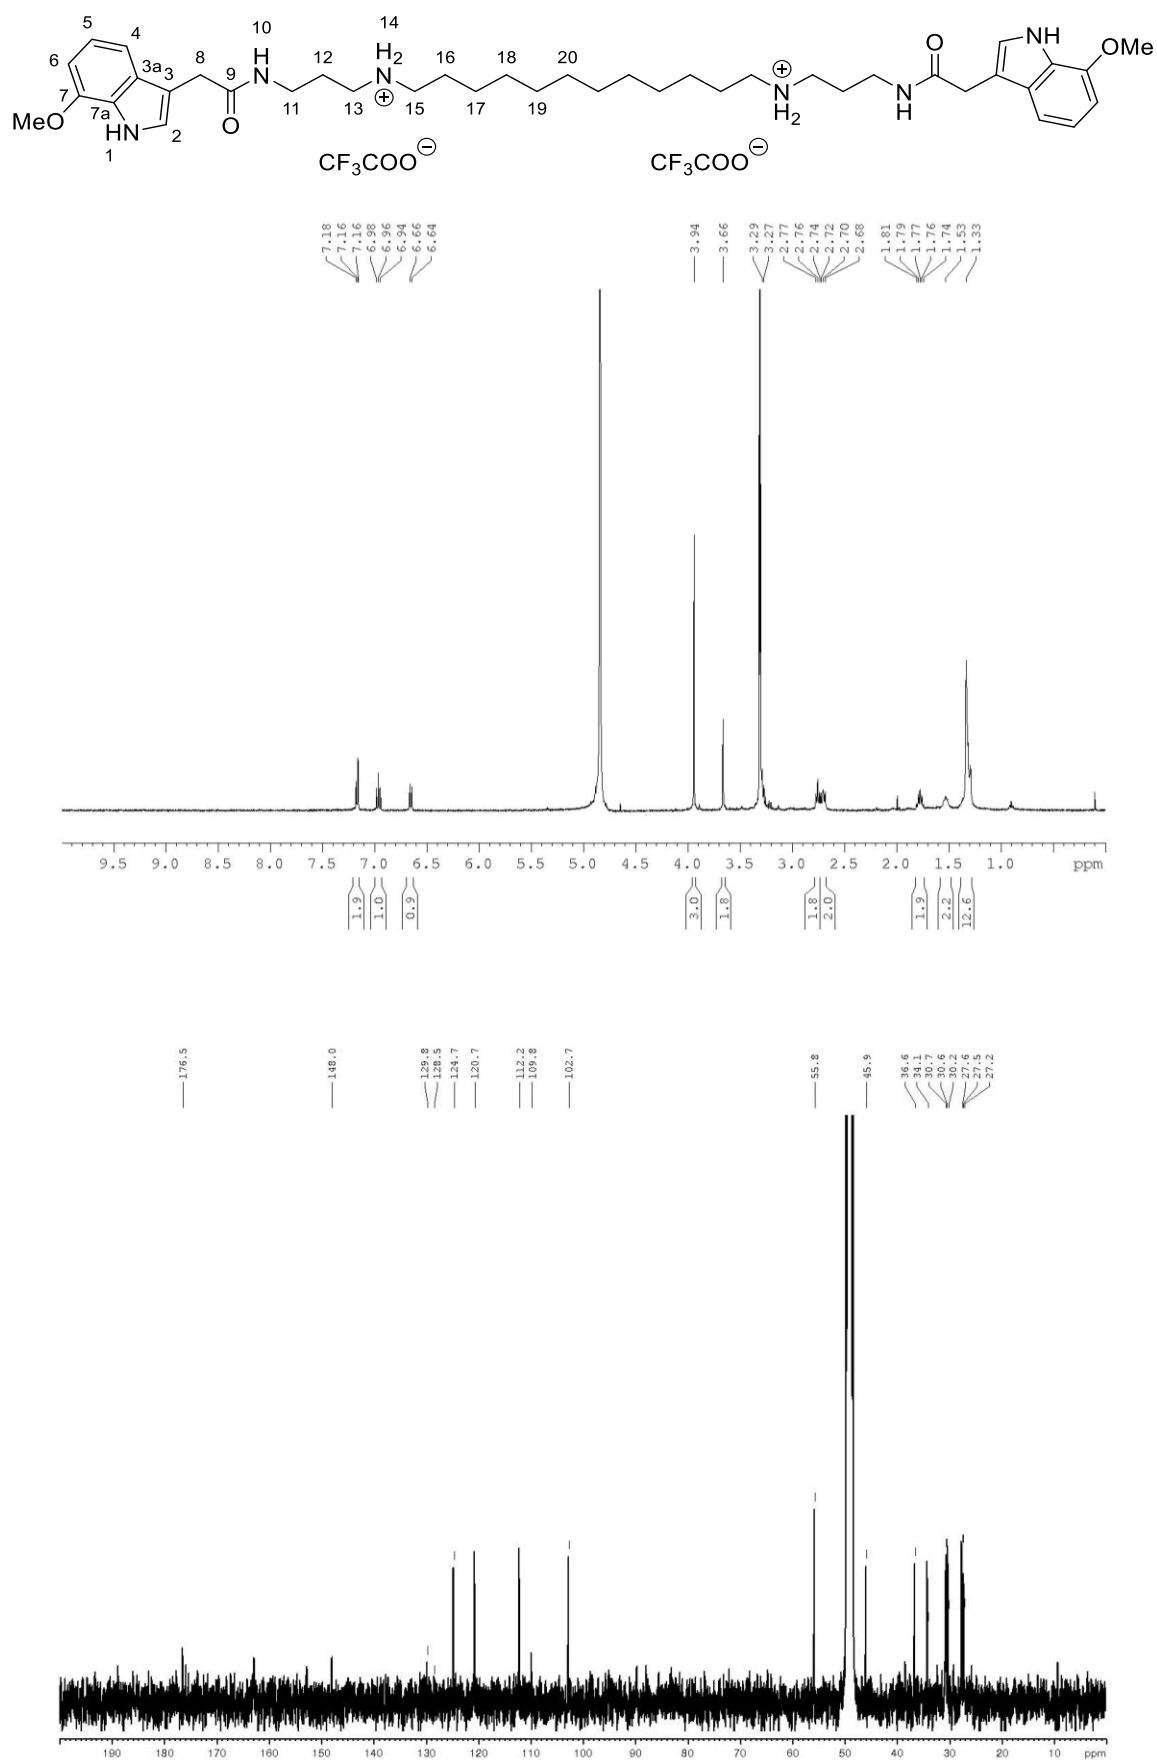

**Figure S33**  $^1\text{H}$  (CD<sub>3</sub>OD, 400 MHz) and  $^{13}\text{C}$  (CD<sub>3</sub>OD, 100 MHz) NMR spectra for **19f**

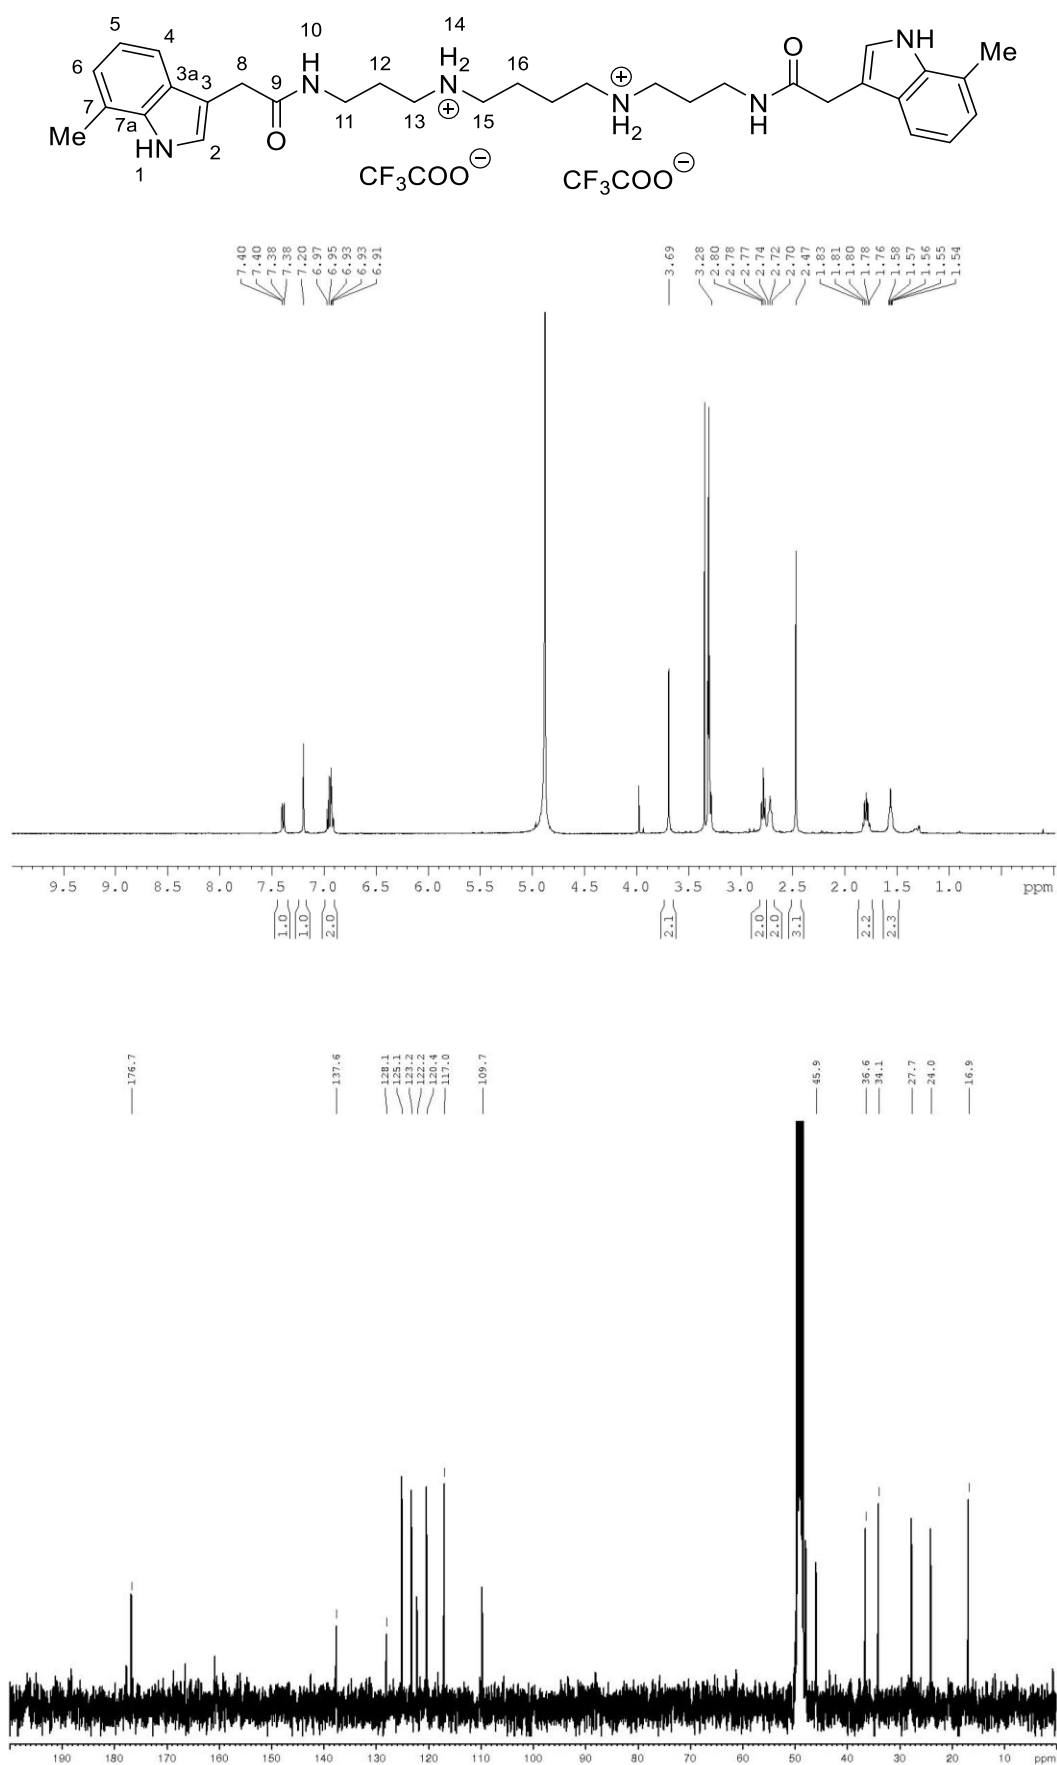

**Figure S34** <sup>1</sup>H (CD<sub>3</sub>OD, 400 MHz) and <sup>13</sup>C (CD<sub>3</sub>OD, 100 MHz) NMR spectra for **20a**

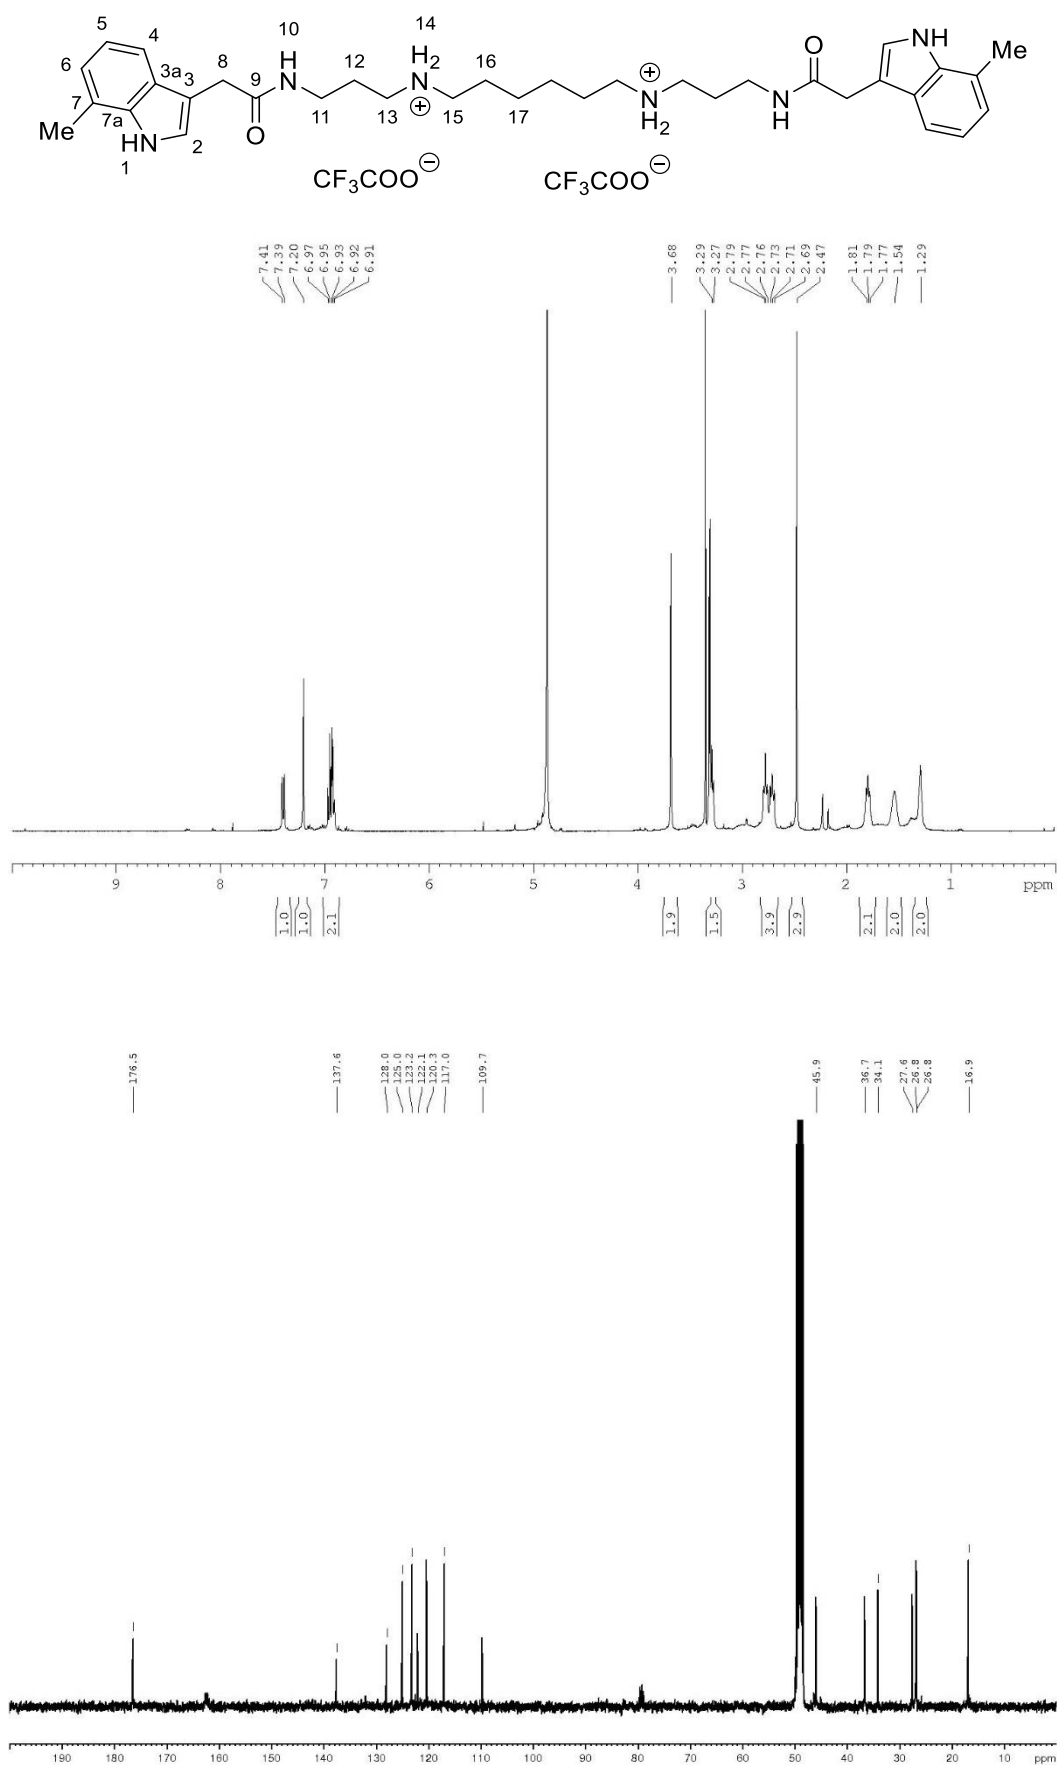

**Figure S35**  $^1\text{H}$  (CD $_3$ OD, 400 MHz) and  $^{13}\text{C}$  (CD $_3$ OD, 100 MHz) NMR spectra for **20b**

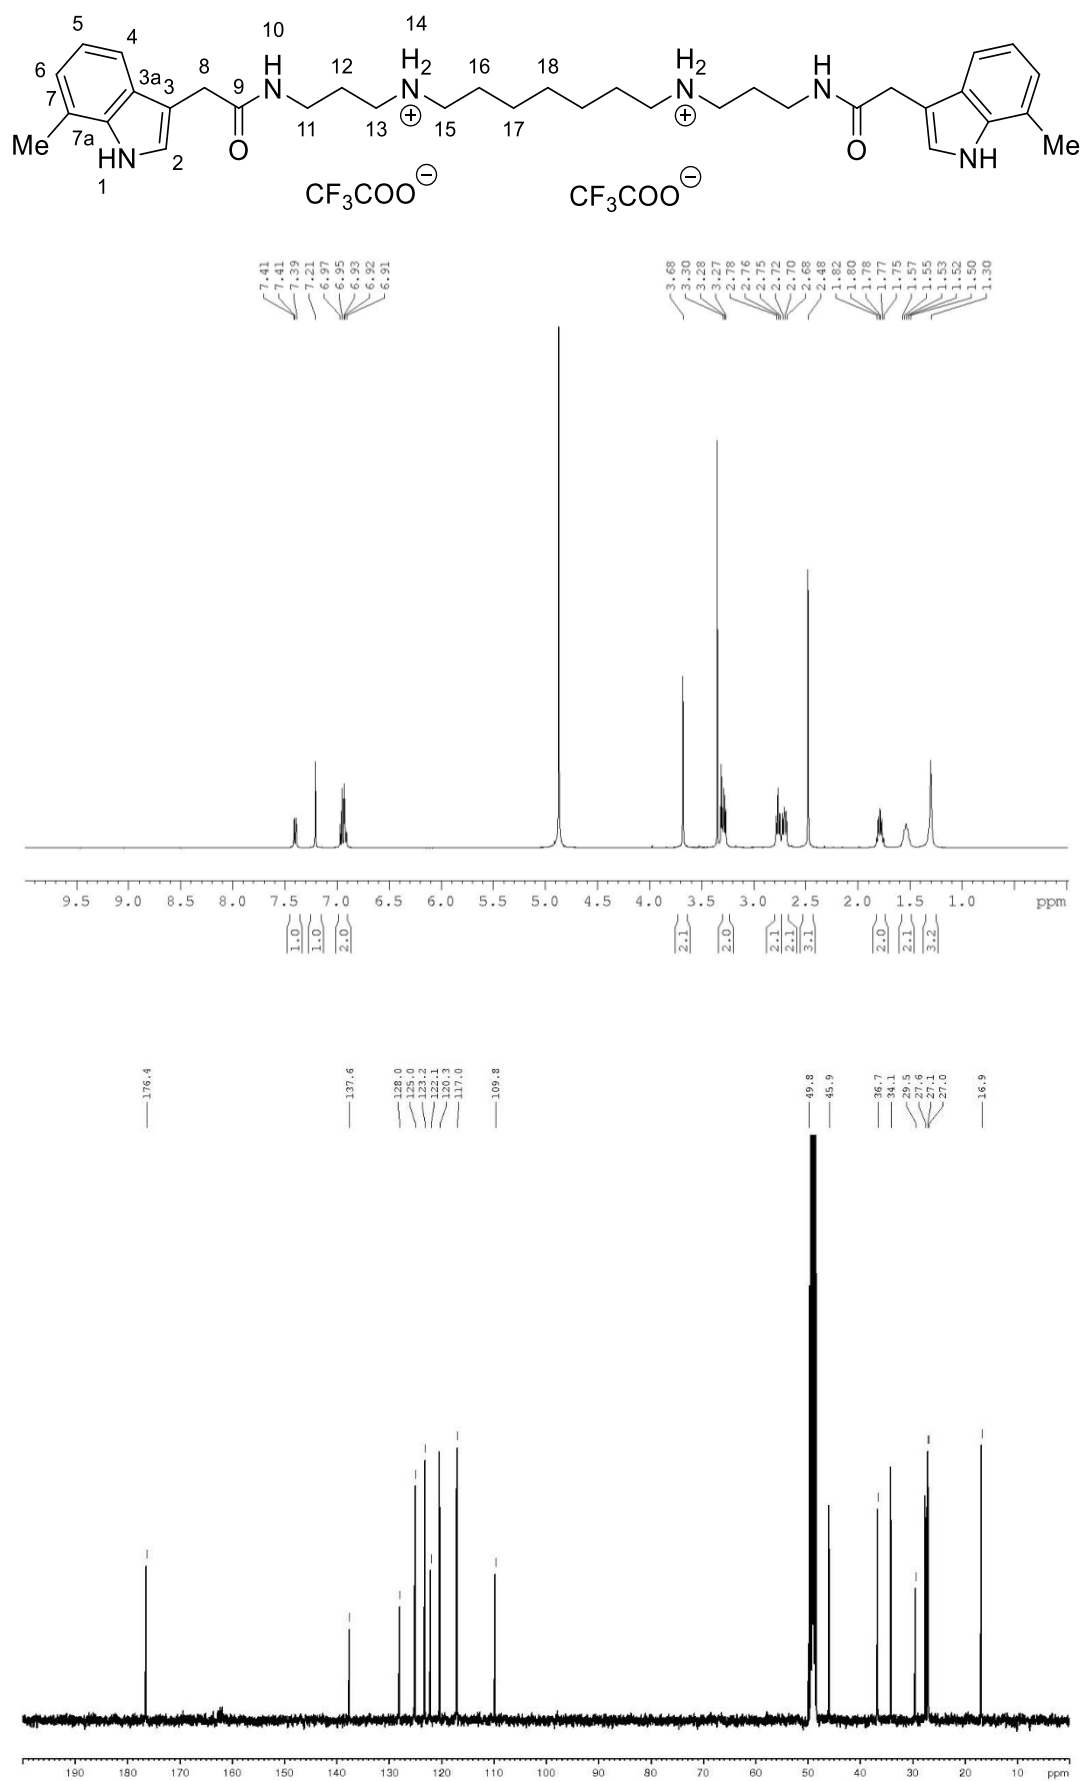

**Figure S36**  $^1\text{H}$  ( $\text{CD}_3\text{OD}$ , 400 MHz) and  $^{13}\text{C}$  ( $\text{CD}_3\text{OD}$ , 100 MHz) NMR spectra for **20c**

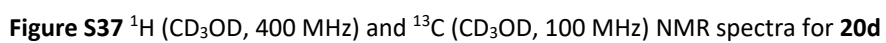

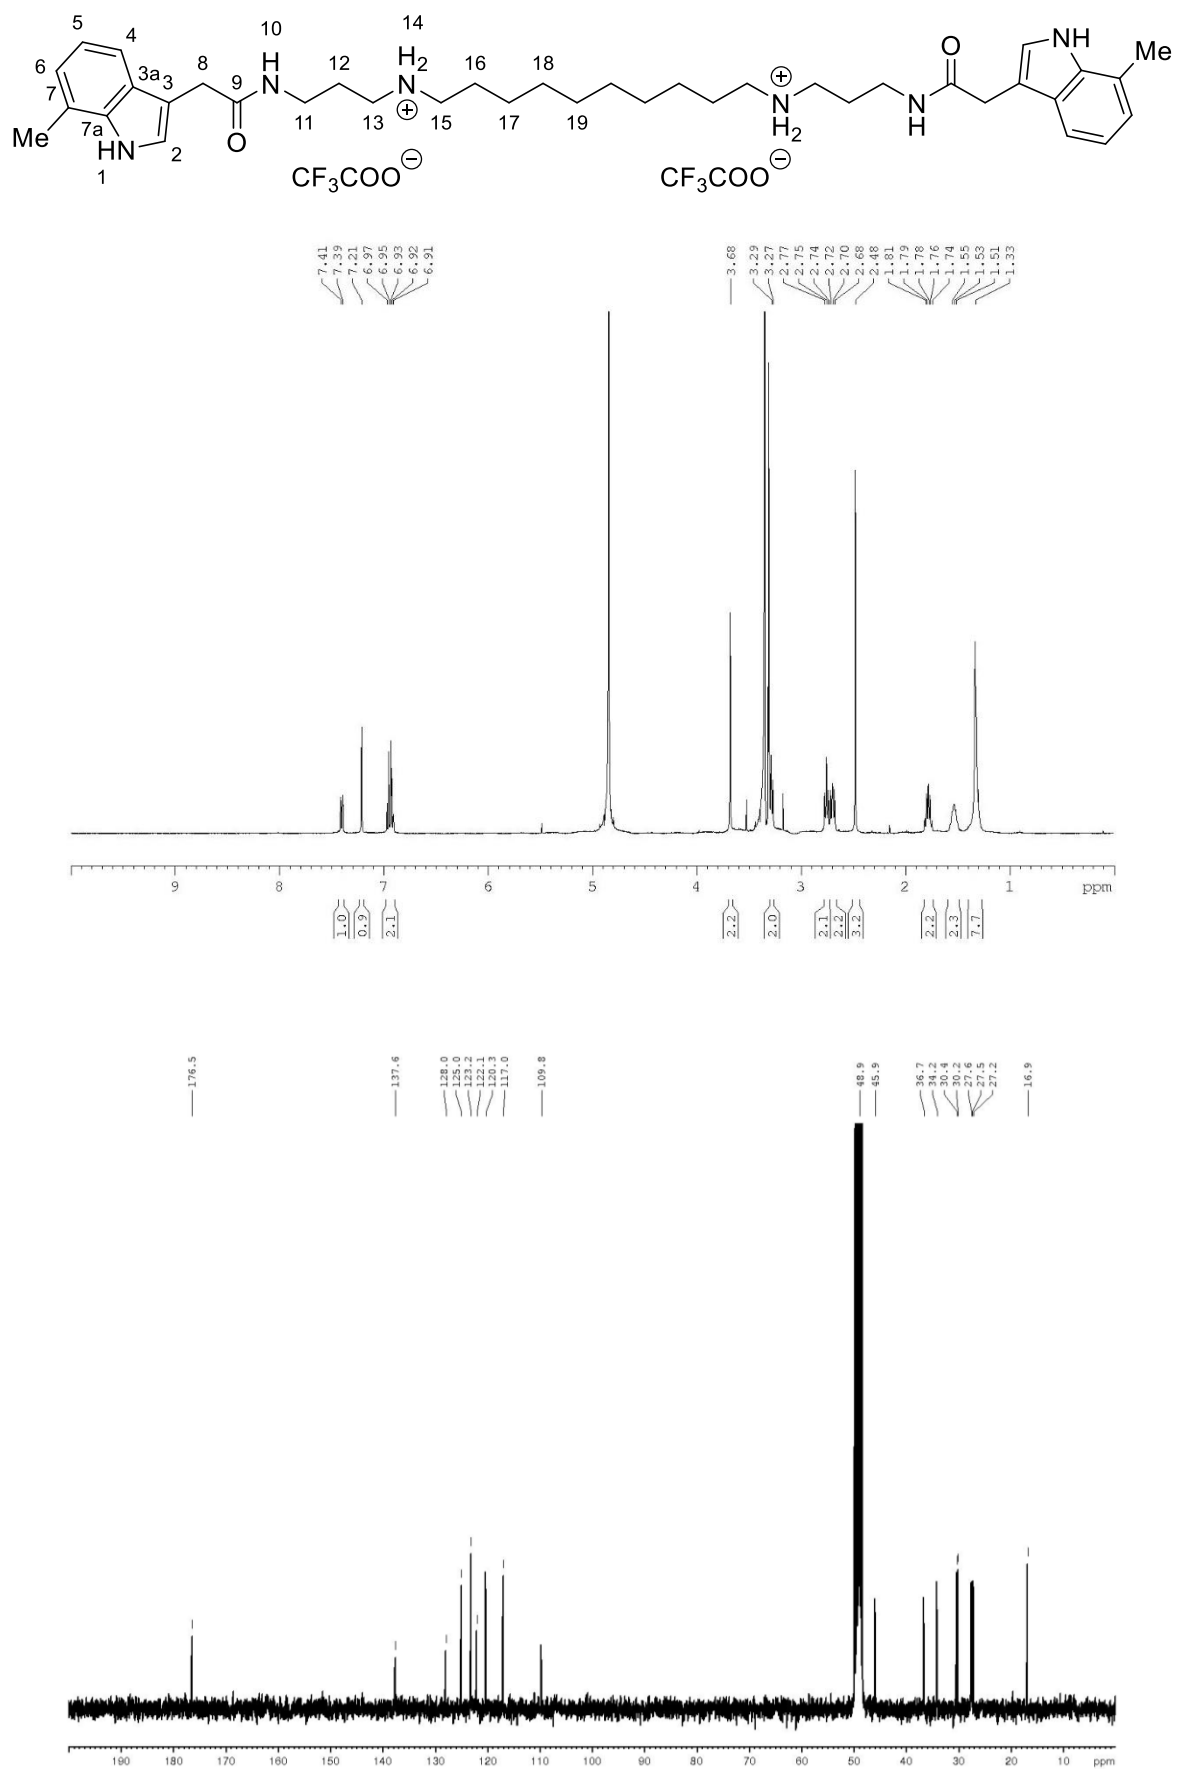

**Figure S38**  $^1\text{H}$  (CD<sub>3</sub>OD, 400 MHz) and  $^{13}\text{C}$  (CD<sub>3</sub>OD, 100 MHz) NMR spectra for **20e**



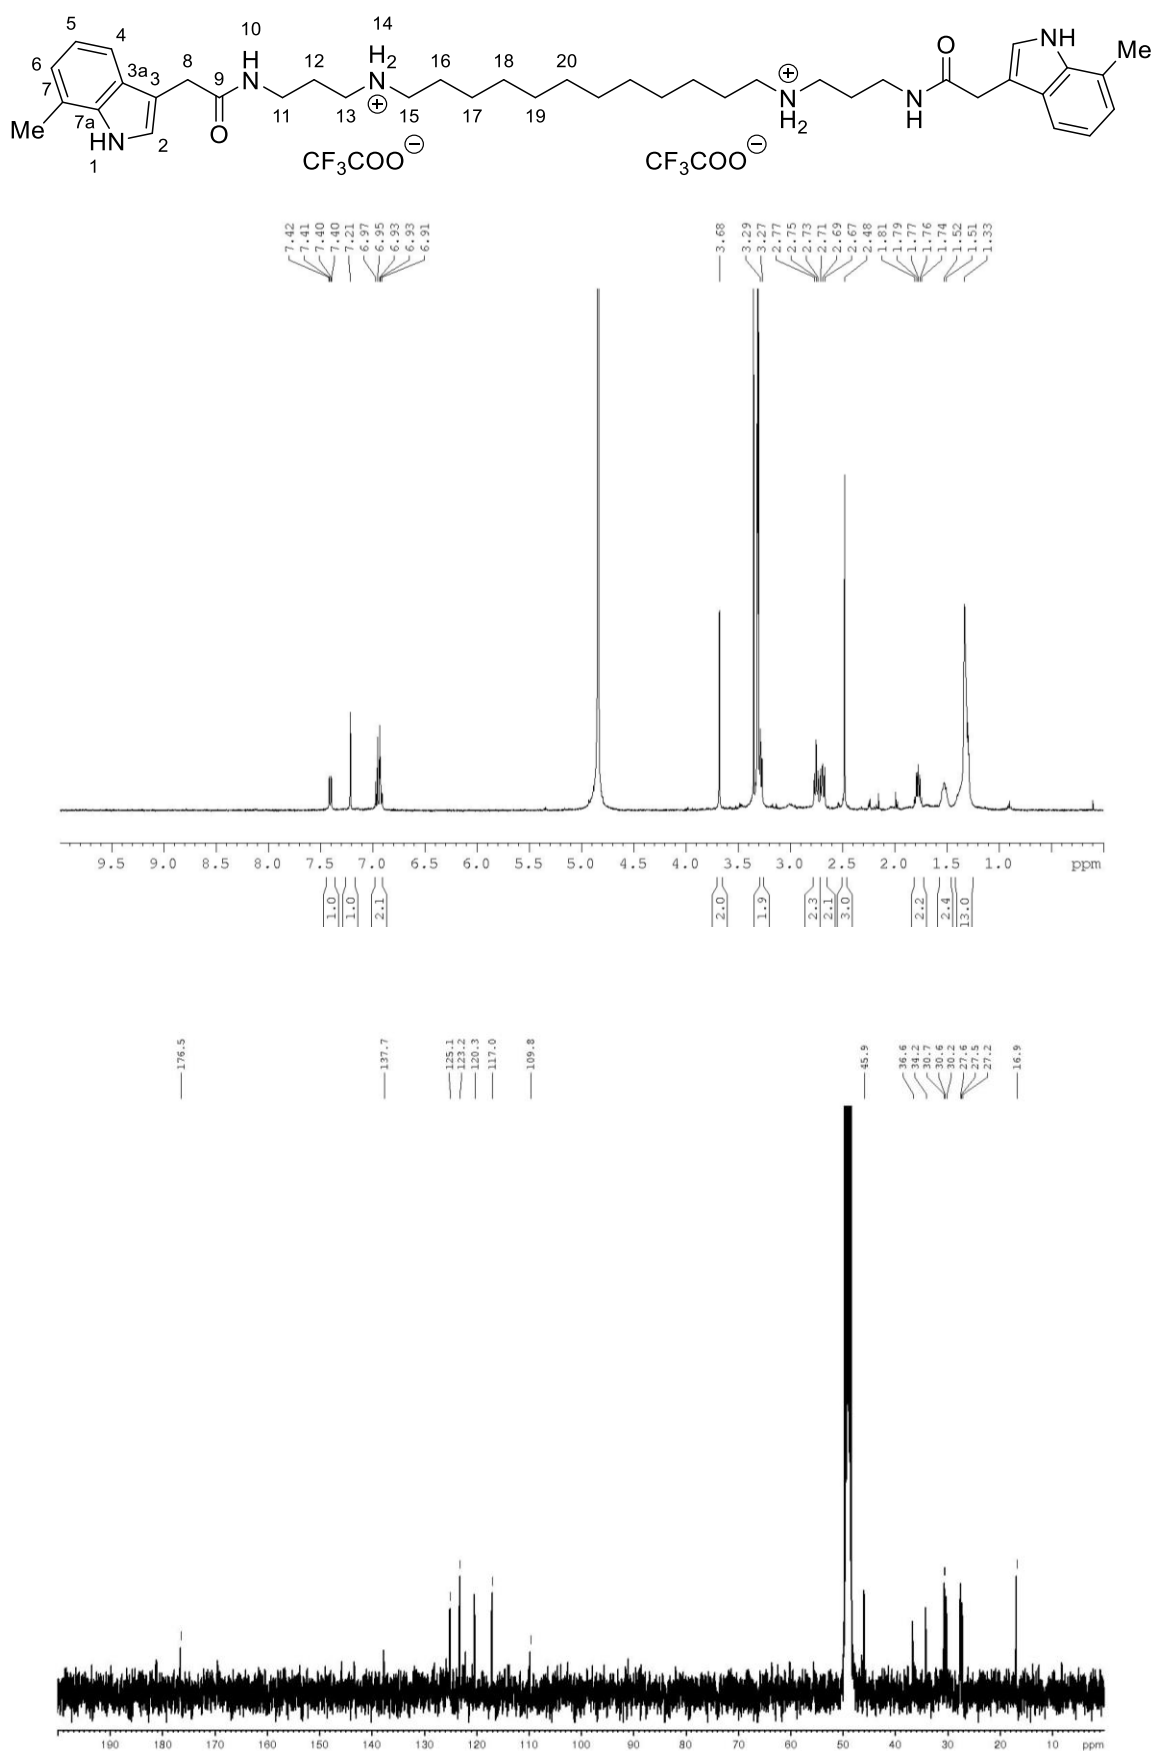

**Figure S39** <sup>1</sup>H (CD<sub>3</sub>OD, 400 MHz) and <sup>13</sup>C (CD<sub>3</sub>OD, 100 MHz) NMR spectra for **20f**
